# Supplementary material
Source: ML conference proceedings conference paper supplement (https://openreview.net/forum?id=8-aqFHleFyC)
Supplement: supplementary_material [file attachment]

# ON $\mathcal{O}(1/K)$ CONVERGENCE AND LOW SAMPLE COMPLEXITY FOR SINGLE-TIMESCALE POLICY EVALUATION WITH NONLINEAR FUNCTION APPROXIMATION

**Anonymous authors**

Paper under double-blind review

## ABSTRACT

Learning an accurate value function for a given policy is a critical step in solving reinforcement learning (RL) problems. So far, however, the convergence speed and sample complexity performances of most existing policy evaluation algorithms remain unsatisfactory, particularly with *non-linear* function approximation. This challenge motivates us to develop a new variance-reduced primal-dual method (VRPD) that is able to achieve a fast convergence speed for RL policy evaluation with nonlinear function approximation. To lower the high sample complexity limitation of variance-reduced approaches (due to the periodic full gradient evaluation with all training data), we further propose an enhanced VRPD method with an adaptive-batch adjustment (VRPD<sup>+</sup>). The main features of VRPD include: i) VRPD allows the use of *constant* step sizes and achieves the  $\mathcal{O}(1/K)$  convergence rate to the first-order stationary points of non-convex policy evaluation problems; ii) VRPD is a generic *single*-timescale algorithm that is also applicable for solving a large class of non-convex strongly-concave minimax optimization problems; iii) By adaptively adjusting the batch size via historical stochastic gradient information, VRPD<sup>+</sup> is more sample-efficient empirically without loss of theoretical convergence rate. Our extensive numerical experiments verify our theoretical findings and showcase the high efficiency of the proposed VRPD and VRPD<sup>+</sup> algorithms compared with the state-of-the-art methods.

## 1 INTRODUCTION

In recent years, advances in reinforcement learning (RL) have achieved enormous successes in a large number of areas, including healthcare (Petersen et al., 2019; Raghu et al., 2017b), financial recommendation (Theodorou et al., 2015), resources management (Mao et al., 2016; Tesauro et al., 2006) and robotics (Kober et al., 2013; Levine et al., 2016; Raghu et al., 2017a), to name just a few. In RL applications, an agent interacts with an environment and repeats the tasks of observing the current state, performing a policy-based action, receiving a reward, and transition to the next state. A key step in many RL algorithms is the policy evaluation (PE) problem, which aims to learn the value function that estimates the expected long-term accumulative reward for a given policy. Value functions not only explicitly provide the agent’s accumulative rewards, but could also be utilized to update the current policy so that the agent can visit valuable states more frequently (Bertsekas & Tsitsiklis, 1995; Lagoudakis & Parr, 2003). In RL policy evaluation, two of the most important performance metrics are *convergence rate* and *sample complexity*. First, since policy evaluation is a subroutine of an overall RL task, developing fast-converging policy evaluation algorithms is of critical importance to the overall efficiency of RL. Second, due to the challenges in collecting a large number of training samples (trajectories of state-action pairs) for policy evaluations in RL, reducing the number of samples (i.e., sample complexity) can significantly alleviate the burden of data collection for solving policy evaluation problems. These two important aspects motivate us to pursue a fast-converging policy evaluation algorithm with a low sample-complexity in this paper.

Among various algorithms for policy evaluation, one of the simplest and most effective methods is the temporal difference (TD) learning approach (Sutton, 1988). Instead of focusing on the predicted and actual outcomes, the key idea of the TD learning is to make the difference between temporally successive predictions small. Specifically, the TD learning approach learns the value function by

using the Bellman equation to bootstrap from the current estimated value function. To date, there have been many algorithms proposed within the family of TD learning (Dann et al., 2014). However, most of these methods suffer from either a unstable convergence performance, (e.g., TD( $\lambda$ ) (Sutton, 1988) for off-policy training) or a high computational complexity (e.g., least-squares temporal difference (LSTD) (Boyan, 2002; Bradtke & Barto, 1996)) in training with massive features. The limitation of these early attempts is largely due to the fact that they do not leverage the gradient-oracle in policy evaluation. Thus, in recent years, gradient-based policy evaluation algorithms have become increasingly prevalent. However, the design of efficient gradient-based policy evaluation algorithm is a non-trivial task. On one hand, as an RL task becomes more sophisticated, it is more appropriate to utilize *nonlinear function approximation* (e.g., deep neural network (DNN)) to model the value function. However, when working with nonlinear DNN models, the convergence performance of the conventional single-timescale TD algorithms may not be guaranteed (Tsitsiklis & Van Roy, 1997). To address this issue, some convergent two-timescale algorithms (Bhatnagar et al., 2009; Chung et al., 2018) have been proposed at the expense of higher implementation complexity. On the other hand, modern policy evaluation tasks could involve a large amount of state transition data. To perform policy evaluation, algorithms typically need to calculate *full gradients* that require all training data (e.g., gradient temporal difference (GTD) (Sutton et al., 2008) and TD with gradient correction (TDC) (Sutton et al., 2009b)), which entails a high sample complexity. So far, existing works on PE are either focus on linear approximation (GTD2 (Sutton et al., 2009b), PDBG (Du et al., 2017), SVRG (Du et al., 2017), SAGA (Du et al., 2017)) or have such a slower convergence performance (STSG (Qiu et al., 2020), VR-STSG (Qiu et al., 2020), nPD-VR (Wai et al., 2019)) (see detailed discussions in Section. 2). In light of the above limitations, in this paper, we ask the following question: *Could we develop an efficient single-timescale gradient-based algorithm for policy evaluation based on nonlinear function approximation?*

In this paper, we give an *affirmative* answer to the above question. Specifically, we propose an efficient gradient-based variance-reduced primal-dual algorithm (VRPD) to tackle the policy evaluation problem with nonlinear function approximation, which we recast as a minimax optimization problem. Our VRPD algorithm admits a simple and elegant *single-timescale* algorithmic structure. Then, we further enhance VRPD by proposing VRPD<sup>+</sup>, which uses adaptive batch sizes to relax the periodic full gradient evaluation to further reduce sample complexity. The main contribution of this paper is that our proposed algorithms achieve an  $\mathcal{O}(1/K)$  convergence rate ( $K$  is the number of iterations) with *constant step-sizes* for policy evaluation with *nonlinear* function approximation, which is the *best-known* result in the literature thus far. Our main results are highlighted as follows:

- By utilizing a variance reduction technique, our VRPD algorithm allows *constant step-sizes* and enjoys a low sample complexity. We show that, under mild assumptions and appropriate parameter choices, VRPD achieves an  $\mathcal{O}(1/K)$  convergence rate to the first-order stationary point of a class of nonconvex-strongly-concave (NCSC) minimax problems, which is the best-known result in the literature. To achieve this result, our convergence rate analysis introduces new proof techniques and resolves an open question and clarifies an ambiguity in the state-of-the-art convergence analysis of VR-based policy evaluation methods (see 2nd paragraph in Section 2.1 for more discussions).
- VRPD<sup>+</sup> significantly improves the sample complexity of the VRPD algorithm for policy evaluation with massive datasets. Our VRPD<sup>+</sup> (adaptive-batch VRPD) algorithm incorporates historical information along the optimization path, but does not involve backtracking and condition verification. We show that our VRPD<sup>+</sup> algorithm significantly reduces the number of samples and the computation loads of gradients, thanks to our proposed adaptive batch size technique that is able to avoid full gradient evaluation.
- Our extensive experimental results also confirm that our algorithms outperform the state-of-the-art gradient-based policy evaluation algorithms, and our VRPD<sup>+</sup> can further reduce the sample complexity compared to the VRPD algorithm. It is worth noting that, although the focus of our work is on RL policy evaluation, our algorithmic design and proof techniques contribute to the area of minimax optimization and could be of independent theoretical interest.

## 2 RELATED WORK

**1) TD Learning with Function Approximation for Policy Evaluation:** TD learning with function approximation plays a vital role in policy evaluation for RL. The key idea of TD learning is to

Table 1: Algorithms comparison for solving policy evaluation.  $M$  is the size of the dataset;  $K$  is the total iteration.

| Algorithm                       | Function Approx. | Problem          | Step-size          | Convergence Rate                            |
|---------------------------------|------------------|------------------|--------------------|---------------------------------------------|
| GTD2 Sutton et al. (2009b)      | Linear           | -                | $\mathcal{O}(1)$   | -                                           |
| PDBG Du et al. (2017)           | Linear           | Convex-Concave   | $\mathcal{O}(1)$   | $\mathcal{O}(1/K)$                          |
| SVRG Du et al. (2017)           | Linear           | Convex-Concave   | $\mathcal{O}(1)$   | $\mathcal{O}(1/K)$                          |
| SAGA Du et al. (2017)           | Linear           | Convex-Concave   | $\mathcal{O}(1)$   | $\mathcal{O}(1/K)$                          |
| STSG Qiu et al. (2020)          | Nonlinear        | Stochastic/NCSC  | $\mathcal{O}(1)$   | $\mathcal{O}(1/K^{1/2})$                    |
| VR-STSG Qiu et al. (2020)       | Nonlinear        | Stochastic/ NCSC | $\mathcal{O}(1)$   | $\mathcal{O}(1/K^{2/3})$                    |
| nPD-VR Wai et al. (2019)        | Nonlinear        | Finte-Sum / NCSC | $\mathcal{O}(1/M)$ | Conjectured <sup>1</sup> $\mathcal{O}(1/K)$ |
| <b>VRPD [Ours.]</b>             | Nonlinear        | Finte-Sum / NCSC | $\mathcal{O}(1)$   | $\mathcal{O}(1/K)$                          |
| <b>VRPD<sup>+</sup> [Ours.]</b> | Nonlinear        | Finte-Sum / NCSC | $\mathcal{O}(1)$   | $\mathcal{O}(1/K)$                          |

<sup>1</sup> Whether nPD-VR achieves  $\mathcal{O}(1/K)$  convergence rate remains an open question. See the detailed discussions in Sections 2 and 4.

minimize the Bellman error for approximating the value function. So far, most existing TD learning algorithms with theoretical guarantees focus on *the linear setting* (e.g., (Sutton et al., 2009a; Srikant & Ying, 2019; Xu et al., 2020b; Stankovic & Stankovic, 2016; Touati et al., 2018)). Doan et al. (2019), Liu et al. (2015), Macua et al. (2014), and Zhang & Xiao (2019) provided a finite-time analysis for the proposed distributed TD(0) and showed that the convergence rate of their algorithm is  $\mathcal{O}(1/K)$ . It was shown in Du et al. (2017) that policy evaluation with linear function approximation by TD(0) can be formulated as a strongly convex-concave or convex-concave problem, and can be solved by a primal-dual method with a linear convergence rate. However, the linearity assumption cannot be applied in a wide range of policy evaluations with nonlinear models. TD learning with nonlinear (smooth) function approximation is far more complex. Maei et al. (2009) was among the first to propose a general framework for minimizing the generalized mean-squared projected Bellman error (MSPBE) with smooth and *nonlinear* value functions. However, they adopted *two-timescale* step-sizes but only obtained a slow convergence performance. Other TD methods with nonlinear function approximations for policy evaluations include (Wang et al., 2017; 2016). Qiu et al. (2020) also investigated nonlinear TD learning and proposed two single-timescale first-order stochastic algorithms. However, the convergence rate of their STSG and VR-STSG are  $\mathcal{O}(1/K^{1/4})$  and  $\mathcal{O}(1/K^{1/3})$ , while our VRPD algorithm achieves a *much faster*  $\mathcal{O}(1/K)$  convergence rate.

In policy evaluation with non-linear function approximation, the state-of-the-art and the most related work to ours is (Wai et al., 2019), which showed that minimizing the generalized MSPBE problem is equivalent to solving a non-convex-strongly-concave (NCSC) minimax optimization problem via the Fenchel’s duality. However, their best convergence results only hold when the step-size is  $\mathcal{O}(\frac{1}{M})$ , where  $M$  is the size of the dataset. This is problematic for modern RL problems with a large state-action transition dataset. More importantly, although their convergence theorem appears to have a  $\frac{1}{K}$  factor ( $K$  being the total number of iterations), their convergence rate bound is in the form of  $\frac{F^{(K)} + \text{Constant1}}{K \cdot \text{Constant2}}$  (cf. Theorem 1, Eq. (26) in Wai et al. (2019)). Notably, the  $F^{(K)}$  term in the denominator in Eq. (26) inherently depends on the primal and dual values  $\theta^{(K)}$  and  $\omega^{(K)}$  in the  $K$ -th iteration, respectively. It is unclear whether  $\omega^{(K)}$  can be bounded in (Wai et al., 2019), hence leading to an ambiguity in guaranteeing an  $\mathcal{O}(1/K)$  convergence rate. Thus, *whether an  $\mathcal{O}(1/K)$  convergence rate is achievable in single-timescale policy evaluation with nonlinear function approximation and constant step-sizes remains an open question thus far.* **The key contribution and novelty** in this paper is that we resolve the above open question by proposing two new algorithms, both achieving an  $\mathcal{O}(1/K)$  convergence rate. To establish this result, we propose a **new convergence metric** (cf. Eq. (9) in Section 4.1), which necessitates new proof techniques and analysis. For easy comparisons, we summarize our algorithms and the related works in Table 1.

**2) Relations with NCSC Minimax Optimization:** Although the focus of our paper is on RL policy evaluation, our algorithmic techniques are also related to the area of NCSC minimax optimization due to the primal-dual MSPBE formulation (cf. Eq. (2) in Section 3). Early attempts in (Nouiehed et al., 2019; Lin et al., 2020b) developed gradient descent-ascent algorithms to solve the NCSC minimax problems. However, these methods suffer from a high sample complexity and slow convergence rate. To overcome this limitation, two variance-reduction algorithms named SREDA (Luo et al., 2020) are proposed for solving NCSC minimax problems, which shares some similarity to our work.

Later, Xu et al. (2020a) enhanced SREDA to allow bigger step-sizes. However, our algorithms still differ from SREDA in the following key aspects: (i) Our algorithms are *single-timescale* algorithms, which are much easier to implement. In comparison, SREDA is a two-timescale algorithm, where solving an inner concave maximization subproblem is needed. Thus, to a certain extent, SREDA can be viewed as a triple-loop structure, and hence the computational complexity of SREDA is higher than ours; (ii) *In the initialization stage, SREDA uses the PiSARAH, which is a subroutine that aims to help the SREDA algorithm achieve the desired accuracy at the initialization step and can be seen as an additional step to solve an inner concave maximization subproblem. Thus, SREDA has a higher computation cost than our paper.* (iii) The number of parameters in SREDA are far more than ours and it requires the knowledge of the condition number to set the algorithm’s parameters for good convergence performance. By contrast, our algorithms only require step-sizes  $\alpha$  and  $\beta$  to be sufficiently small, which is easier to tune in practice. (iv) SREDA does *not* provide an explicit convergence rate in their paper (it is unclear what their convergence rate is from their proof either). Yet, we show that our VRPD in theory has a lower sample complexity than that of SREDA.

Another related work in terms of NCSC minimax optimization is (Zhang et al., 2021), which also provided sample complexity upper and lower bounds. However, there remains a gap between the sample complexity lower and upper bounds in (Zhang et al., 2021). By contrast, the sample complexity of our VRPD algorithm *matches the lower bound*  $\mathcal{O}(M + \sqrt{M}\epsilon^{-2})$  in (Zhang et al., 2021), which is the *first* in the literature. Furthermore, the algorithm contains an inner minimax subproblem (cf. Line 6 of Algorithm 1 in Zhang et al. (2021)). Solving such a subproblems in the inner loop incurs high computational costs. Due to this reason, the algorithm in (Zhang et al., 2021) had to settle for an inexact solution, which hurts the convergence performance in practice. In contrast, our algorithm does not have such a limitation.

### 3 PRELIMINARIES AND PROBLEM STATEMENT

We start from introducing the necessary background of reinforcement learning, with a focus on the policy evaluation problem based on nonlinear function approximation.

**1) Policy Evaluation with Nonlinear Approximation:** RL problems are formulated using the Markov decision process (MDP) framework defined by a five-tuple  $\{\mathcal{S}, \mathcal{A}, P, \gamma, \mathcal{R}\}$ , where  $\mathcal{S}$  denotes the state space and  $\mathcal{A}$  is the action space;  $P : \mathcal{S} \times \mathcal{A} \rightarrow \mathcal{S}$  represents the transition function, which specifies the probability of one state transitioning to another after taking an action;  $\mathcal{R}$  denotes the space of the received reward upon taking an action  $a \in \mathcal{A}$  under state  $s \in \mathcal{S}$  (in this paper, we assume that the state and action spaces are finite, but the numbers of states and actions could be large); and  $\gamma \in [0, 1)$  is a time-discount factor.

For RL problems over an infinite discrete-time horizon  $\{t \in \mathbb{N}\}$ , the learning agent executes an action  $a_t$  according to the state  $s_t$  and some policy  $\pi : \mathcal{S} \rightarrow \mathcal{A}$ . The system then transitions into a new random state  $s_{t+1}$  in the next time-slot. Also, the agent receives a random reward  $R^\pi(s_t, a_t)$ . The trajectory generated by a policy  $\pi$  is a sequence of state-action pairs denoted as  $\{s_1, a_1, s_2, a_2, \dots\}$ . The goal of the agent is to learn an optimal policy  $\pi^*$  to maximize the long-term discounted total reward. Specifically, for a policy  $\pi$  (could be a randomized policy), the expected reward received by the agent at state  $s$  in any given time-slot can be computed as  $R^\pi(s) = \mathbb{E}_{a \sim \pi(\cdot|s)}[R^\pi(s, a)]$ . The value function  $V^\pi(s_0) = \mathbb{E}[\sum_{t=0}^{\infty} \gamma^t R(s_t) \mid s_0, \pi]$  indicates the long-term discounted reward of policy  $\pi$  over an infinite horizon with the initial state at  $s_0 \in \mathcal{S}$ . Also, the Bellman equation implies that  $V^\pi(\cdot) : \mathcal{S} \rightarrow \mathbb{R}$  satisfies  $V^\pi(s) = \mathcal{T}^\pi V^\pi(s)$ , where  $\mathcal{T}^\pi f(s) \triangleq \mathbb{E}[R^\pi(s) + \gamma f(s') \mid a \sim \pi(\cdot|s), s' \sim P(\cdot|s, a)]$  denotes the Bellman operator. In RL, the agent’s goal is to determine an optimal policy  $\pi^*$  that maximizes the value function  $V^\pi(s)$  from any initial state  $s$ .

However, the first obstacle in solving RL problems stems from evaluating  $V^\pi(\cdot)$  for a given  $\pi$  since  $P(\cdot|s, a)$  is unknown. Moreover, it is often infeasible to store  $V^\pi(s)$  since the state space  $\mathcal{S}$  could be large. To address these challenges, one popular approach in RL is to approximate  $V^\pi(\cdot)$  using a family of parametric and smooth functions in the form of  $V^\pi(\cdot) \approx V_{\theta^\pi}(\cdot)$ , where  $\theta^\pi \in \mathbb{R}^d$  is a  $d$ -dimensional parameter vector. Here,  $\Theta$  is a compact subspace. For notational simplicity, we will omit all superscripts “ $\pi$ ” whenever the policy  $\pi$  is clear from the context. In this paper, we focus on *nonlinear* function approximation, i.e.,  $V_\theta(\cdot) : \mathcal{S} \rightarrow \mathbb{R}$  is a nonlinear function with respect to (w.r.t.)  $\theta$ . For example,  $V_\theta(\cdot)$  could be based on a  $\theta$ -parameterized nonlinear DNN. We assume that the gradient and Hessian of  $V_\theta(\cdot)$  exist and are denoted as:  $g_\theta(s) := \nabla_\theta V_\theta(s) \in \mathbb{R}^d$ ,  $H_\theta(s) := \nabla_\theta^2 V_\theta(s) \in \mathbb{R}^{d \times d}$ .

Our goal is to find the optimal parameter  $\theta^* \in \mathbb{R}^d$  that minimizes the error between  $V_{\theta^*}(\cdot)$  and  $V(\cdot)$ . This problem can be formulated as minimizing the mean-squared projected Bellman error (MSPBE) of the value function as follows (Liu et al., 2018):

$$\begin{aligned} \text{MSPBE}(\theta) &:= \frac{1}{2} \left\| \mathbb{E}_{\mathbf{s} \sim D^\pi(\cdot)} [(\mathcal{T}^\pi V_\theta(s) - V_\theta(s)) \nabla_\theta V_\theta(s)^\top] \right\|_{\mathbf{D}^{-1}}^2 \\ &= \max_{\omega \in \mathbb{R}^d} \left( -\frac{1}{2} \mathbb{E}_{\mathbf{s} \sim D^\pi(\cdot)} [(\omega^\top g_\theta(s))^2] + \langle \omega, \mathbb{E}_{\mathbf{s} \sim D^\pi(\cdot)} [(\mathcal{T}^\pi V_\theta(s) - V_\theta(s)) g_\theta(s)] \rangle \right), \end{aligned} \quad (1)$$

where  $D^\pi(\cdot)$  is the stationary distribution of under policy  $\pi$  and  $\mathbf{D} = \mathbb{E}_{\mathbf{s} \sim D^\pi} [g_\theta(s) g_\theta(s)^\top] \in \mathbb{R}^{d \times d}$ .

**2) Primal-Dual Optimization for MSPBE:** It is shown in (Liu et al., 2018) (cf. Proposition 1) that minimizing MSPBE( $\theta$ ) in (1) is equivalent to solving a primal-dual minimax optimization problem:

$$\min_{\theta \in \mathbb{R}^d} \max_{\omega \in \mathbb{R}^d} L(\theta, \omega), \quad (2)$$

where  $L(\theta, \omega) \triangleq \langle \omega, \mathbb{E}_{\mathbf{s} \sim D^\pi(\cdot)} [(\mathcal{T}^\pi V_\theta(s) - V_\theta(s)) g_\theta(s)^\top] \rangle - \frac{1}{2} \mathbb{E}_{\mathbf{s} \sim D^\pi(\cdot)} [(\omega^\top g_\theta(s))^2]$ . Since the distribution  $D^\pi(\cdot)$  is unknown and the expectation cannot be evaluated directly, one often considers the following empirical minimax problem by replacing the expectation in  $L(\theta, \omega)$  with a finite sample average approximation in the stochastic objective function based on an  $M$ -step trajectory, i.e.,  $\min_{\theta \in \mathbb{R}^d} \max_{\omega \in \mathbb{R}^d} \mathcal{L}(\theta, \omega) = \min_{\theta \in \mathbb{R}^d} \max_{\omega \in \mathbb{R}^d} \frac{1}{M} \sum_{i=1}^M \mathcal{L}_i(\theta, \omega)$ , where

$$\mathcal{L}_i(\theta, \omega) := \langle \omega, [R(s_i, a_i, s_{i+1}) + \gamma V_\theta(s_{i+1}) - V_\theta(s_i)] \times g_\theta(s_i) \rangle - \frac{1}{2} (\omega^\top g_\theta(s_i))^2. \quad (3)$$

Solving the above empirical minimax problem for MSPBE constitutes the rest of this paper.

#### 4 SOLUTION APPROACH

As mentioned in Section 3, based on an  $M$ -step trajectory  $\{s_1, a_1, \dots, s_M, a_M, s_{M+1}\}$  generated by some policy  $\pi$ , our goal is to solve the empirical primal-dual and finite-sum optimization problem:

$$\min_{\theta \in \mathbb{R}^d} \max_{\omega \in \mathcal{W}} \frac{1}{M} \sum_{i=1}^M \mathcal{L}_i(\theta, \omega) = \min_{\theta \in \mathbb{R}^d} \max_{\omega \in \mathcal{W}} \mathcal{L}(\theta, \omega), \quad (4)$$

where  $\mathcal{W}$  is assumed to be a convex constrained set (Problem (4) becomes Problem (2) when  $\mathcal{W} = \mathbb{R}^d$ ). In our Appendix, we also discussed the min-max problem while  $\theta \in \Theta$ .  $\Theta$  is a convex constrained set. See details in Appendix. 12. Note that Problem (4) could be non-convex (e.g., DNN-based nonlinear approximation). Let  $J(\theta) \triangleq \max_{\omega \in \mathcal{W}} \mathcal{L}(\theta, \omega)$ . Then, we can equivalently rewrite Problem (4) as follows:  $\min_{\theta \in \mathbb{R}^d} \max_{\omega \in \mathcal{W}} \mathcal{L}(\theta, \omega) = \min_{\theta \in \mathbb{R}^d} J(\theta)$ .

Note from (3) that  $\mathcal{L}(\theta, \omega)$  is strongly concave w.r.t.  $\omega$ , which guarantees the existence and uniqueness of the solution to the problem  $\max_{\omega \in \mathcal{W}} \mathcal{L}(\theta, \omega)$ ,  $\forall \theta \in \mathbb{R}^d$ . Then, given  $\theta \in \mathbb{R}^d$ , we define the following notation:  $\omega^*(\theta) := \arg\max_{\omega \in \mathcal{W}} \mathcal{L}(\theta, \omega)$ . Thus,  $J(\theta)$  can be further written as:

$$J(\theta) = \mathcal{L}(\theta, \omega^*) = \max_{\omega \in \mathcal{W}} \mathcal{L}(\theta, \omega). \quad (5)$$

The function  $J(\theta)$  can be viewed as a finite empirical version of MSPBE. We aim to minimize  $J(\theta)$  by finding the stationary point of  $\mathcal{L}(\theta, \omega)$ . To simplify the notation, we use  $\omega^*$  to denote  $\omega^*(\theta)$ . Note that if  $\mathbf{D}$  in Eq. (1) is positive definite, Problem (4) is strongly concave in  $\omega$ , but non-convex in  $\theta$  in general due to the non-convexity of function  $V_\theta$ . Thus, the stated primal-dual objective function is a NCSC optimization problem. In this paper, we make the following assumptions:

**Assumption 1 ( $\mu$ -Strongly Concavity).** The differentiable function  $\mathcal{L}(\theta, \omega)$  is  $\mu$ -strongly concave in  $\omega$ : if  $\mathcal{L}(\theta, \omega) \leq \mathcal{L}(\theta, \omega') + \nabla_\omega \mathcal{L}(\theta, \omega')^\top (\omega - \omega') - \frac{\mu}{2} \|\omega - \omega'\|^2$ ,  $\forall \omega, \omega' \in \mathbb{R}^d$ ,  $\mu > 0$  and any fixed  $\theta \in \mathbb{R}^d$ . The above mentioned condition is equivalent to:  $\|\nabla_\omega \mathcal{L}(\theta, \omega) - \nabla_\omega \mathcal{L}(\theta, \omega')\| \geq \mu \|\omega - \omega'\|$ ,  $\forall \omega, \omega' \in \mathbb{R}^d$ . Similar proofs can be found in Lemma 2 and 3 in Zhou (2018).

**Assumption 2 ( $L_f$ -Smoothness).** For  $i = 1, 2, \dots, M$ , both gradient  $\nabla_\theta \mathcal{L}_i(\theta, \omega)$  and  $\nabla_\omega \mathcal{L}_i(\theta, \omega)$  are  $L_f$ -smooth. That is, for all  $\theta, \theta' \in \mathbb{R}^d$  and  $\omega, \omega' \in \mathbb{R}^d$ , there exists a constant  $L_f > 0$  such that  $\|\nabla \mathcal{L}_i(\theta, \omega) - \nabla \mathcal{L}_i(\theta', \omega')\| \leq L_f (\|\theta - \theta'\| + \|\omega - \omega'\|)$ .

**Algorithm 1** The Variance-Reduced Primal-Dual Stochastic Gradient Method (VRPD).

**Input:** An  $M$ -step trajectory of the state-action pairs  $\{s_1, a_1, s_2, a_2, \dots, s_M, a_M, s_{M+1}\}$  generated from a given policy; step sizes  $\alpha, \beta \geq 0$ ; initialization points  $\theta^0 \in \mathbb{R}^d, \omega^0 \in \mathcal{W}$ .  
**Output:**  $(\theta^{(\tilde{K})}, \omega^{(\tilde{K})})$ , where  $\tilde{K}$  is independently and uniformly picked from  $\{1, \dots, K\}$ ;  
1: **for**  $k = 0, 1, 2, \dots, K - 1$  **do**  
2:     If  $\text{mod}(k, q) = 0$ , compute full gradients  $G_\theta^{(k)}, G_\omega^{(k)}$  as in Eq. (6).  
3:     Otherwise, select  $S$  samples independently and uniformly from  $[M]$ , and compute gradients as in Eq. (7).  
4:     Perform the primal-dual updates to obtain the next iterate  $\theta^{(k+1)}, \omega^{(k+1)}$  as in Eq. (8).  
5: **end for**

**Assumption 3 (Bounded Variance).** There exists a constant  $\sigma > 0$  such that for all  $\theta \in \mathbb{R}^d, \omega \in \mathbb{R}^d$ ,  $\frac{1}{M} \sum_{i=1}^M \|\nabla_\theta \mathcal{L}_i(\theta, \omega) - \nabla_\theta \mathcal{L}(\theta, \omega)\|^2 \leq \sigma^2$  and  $\frac{1}{M} \sum_{i=1}^M \|\nabla_\omega \mathcal{L}_i(\theta, \omega) - \nabla_\omega \mathcal{L}(\theta, \omega)\|^2 \leq \sigma^2$ .

In the above assumptions, Assumption 1 is satisfied if the number of samples  $M$  is sufficiently large and coupling with the fact that the matrix  $\mathbf{D}$  is positive definite. To see that, note that  $\mu = \lambda_{\min}(\mathbf{D}) > 0$ , where  $\mathbf{D} = \mathbb{E}_s [\nabla_\theta V_\theta(s) \nabla_\theta V_\theta(s)^\top] \in \mathbb{R}^{d \times d}$  and  $\mathbf{D}$  tends to be full-rank as  $M$  increases. Thus, as soon as we find a  $\mu > 0$  when  $M$  is sufficiently large, this  $\mu$  is independent of  $M$  as  $M$  continues to increase. Assumption 2 is standard in the optimization literature. Assumption 3 is also commonly adopted for proving convergence results of SGD- and VR-based algorithms, or algorithms that draw a mini-batch of samples instead of all samples. Assumption 3 is guaranteed to hold under the compact set condition and common for stochastic approximation algorithms for minimax optimization (Qiu et al., 2020; Lin et al., 2020a). Assumptions 1–3 are also general assumptions often used in temporal difference (TD) problems (see, e.g., (Qiu et al., 2020; Wai et al., 2019)). With these assumptions, we are now in a position to present our algorithms and their convergence performance results.

#### 4.1 THE VARIANCE-REDUCED PRIMAL-DUAL METHOD

In this section, we first present the variance-reduced primal-dual (VRPD) algorithm for solving policy evaluation problems, followed by the theoretical convergence results. Due to space limitation, we provide a proof sketch in the main text and relegate the proof to the supplementary material.

**1) Algorithm Description:** The full description of VRPD is illustrated in Algorithm 1. In VRPD, for every  $q$  iterations, the algorithm calculates the full gradients as follows:

$$G_\theta^{(k)} = \frac{1}{|M|} \sum_{i \in M} \nabla_\theta \mathcal{L}_i(\theta^{(k)}, \omega^{(k)}); \quad G_\omega^{(k)} = \frac{1}{|M|} \sum_{i \in M} \nabla_\omega \mathcal{L}_i(\theta^{(k)}, \omega^{(k)}). \quad (6)$$

In all other iterations, VRPD selects a batch of samples  $S$  and computes variance-reduced gradient estimators as:

$$G_\theta^{(k)} = \frac{1}{|S|} \sum_{i \in S} (\nabla_\theta \mathcal{L}_i(\theta^{(k)}, \omega^{(k)}) - \nabla_\theta \mathcal{L}_i(\theta^{(k-1)}, \omega^{(k-1)}) + G_\theta^{(k-1)}); \quad (7a)$$

$$G_\omega^{(k)} = \frac{1}{|S|} \sum_{i \in S} (\nabla_\omega \mathcal{L}_i(\theta^{(k)}, \omega^{(k)}) - \nabla_\omega \mathcal{L}_i(\theta^{(k-1)}, \omega^{(k-1)}) + G_\omega^{(k-1)}). \quad (7b)$$

The estimators in (7) are constructed iteratively based on the previous update information  $\nabla_\theta \mathcal{L}_i(\theta^{(k-1)}, \omega^{(k-1)})$  (resp.  $\nabla_\omega \mathcal{L}_i(\theta^{(k-1)}, \omega^{(k-1)})$ ) and  $G_\theta^{(k-1)}$  (resp.  $G_\omega^{(k-1)}$ ). VRPD updates the primal and dual variables as follows:

$$\theta^{(k+1)} = \theta^{(k)} - \beta G_\theta^{(k)}; \quad (8a)$$

$$\omega^{(k+1)} = \mathcal{P}_\mathcal{W}(\omega^{(k)} + \alpha G_\omega^{(k)}) = \underset{\omega \in \Omega}{\operatorname{argmin}} \|\tilde{\omega} - (\omega^{(k)} + \alpha G_\omega^{(k)})\|^2, \quad (8b)$$

where the parameters  $\alpha$  and  $\beta$  are constant learning rates for primal and dual updates, respectively.

**2) Convergence Performance:** In this paper, we propose a *new metric* for convergence analysis:

$$\mathfrak{M}^{(k)} := \|\nabla J(\theta^{(k)})\|^2 + 2\|\omega^{(k)} - \omega^*(\theta^{(k)})\|^2. \quad (9)$$

The first term in (9) measures the convergence of the primal variable  $\theta$ . As common in non-convex optimization analysis,  $\|\nabla J(\theta)\|^2 = 0$  indicates that  $\theta$  is a first-order stationary point



(FOSP) of Problem (4). The second term in (9) measures the convergence of  $\omega^{(k)}$  to the unique maximizer  $\omega^{(k)*}$  for  $\mathcal{L}(\theta_k, \cdot)$ . Note that if Problem (4) is unconstrained in dual (i.e.,  $\omega \in \mathbb{R}^d$ ), it follows from Assumption 2 and  $\|\nabla_{\omega} \mathcal{L}(\theta^{(k)}, \omega^*(\theta^{(k)}))\|^2 = 0$  that  $\mathfrak{M}^{(k)} \geq \|\nabla J(\theta^{(k)})\|^2 + \frac{2}{L_f^2} \|\nabla_{\omega} \mathcal{L}(\theta^{(k)}, \omega^{(k)})\|^2$ . We now introduce the notion of the *approximate first-order stationary points*. We say that point  $\{\theta, \omega\}$  is an  $\epsilon$ -stationary point of function  $\mathcal{L}(\theta, \omega)$  if  $\mathfrak{M} \leq \epsilon$  is satisfied.

**Remark.** Several important remarks on the connections between our metric  $\mathfrak{M}^{(k)}$  and the conventional convergence metrics in the literature are in order. A conventional convergence metric in the literature for NCSC minimax optimization is  $\|\nabla J(\theta^{(k)})\|^2$  (Lin et al., 2020a; Luo et al., 2020; Zhang et al., 2021), which is the first term of  $\mathfrak{M}^{(k)}$  and measures the convergence of the primal variable  $\theta$  under a given dual variable  $\omega$ . This is because  $\|\nabla J(\theta)\|^2 = 0$  implies that  $\theta$  is a FOSP. The *novelty* in our convergence metric is the second term in  $\mathfrak{M}^{(k)}$ , which measures the convergence of  $\omega_k$  to the unique maximizer  $\omega_k^*$  for  $\mathcal{L}(\theta_k, \cdot)$ .

Another conventional convergence metric in the literature of minimizing the empirical MSPBE problem is  $\|\nabla_{\theta} \mathcal{L}(\theta, \omega)\|^2 + \|\nabla_{\omega} \mathcal{L}(\theta, \omega)\|^2$  (Tsitsiklis & Van Roy, 1997). Since the nonconvex-strong-concave minimax optimization problem is unconstrained in dual (i.e.,  $\omega \in \mathbb{R}^d$ ), it follows from Lipschitz-smoothness in Assumption 2 and  $\|\nabla_{\omega} \mathcal{L}(\theta^{(k)}, \omega^*(\theta^{(k)}))\|^2 = 0$  that  $\|\omega^{(k)} - \omega^*(\theta^{(k)})\|^2 \geq \frac{1}{L_f^2} \|\nabla_{\omega} \mathcal{L}(\theta^{(k)}, \omega^{(k)})\|^2$ . Therefore, the second term in our  $\mathfrak{M}^{(k)}$  ( $2\|\omega^{(k)} - \omega^*(\theta^{(k)})\|^2$ ) is an upper bound of the second term in this conventional metric ( $\|\nabla_{\omega} \mathcal{L}(\theta, \omega)\|^2$ ). Thus,  $2\|\omega^{(k)} - \omega^*(\theta^{(k)})\|^2$  is a *stronger* metric than  $\|\nabla_{\omega} \mathcal{L}(\theta, \omega)\|^2$  in the sense that an  $O(1/K)$  convergence rate under  $\mathfrak{M}^{(k)}$  implies an  $O(1/K)$  convergence rate of the conventional metric, but the converse is *not* true. Moreover, the benefit of using  $2\|\omega^{(k)} - \omega^*(\theta^{(k)})\|^2$  in our  $\mathfrak{M}^{(k)}$  is that its special structure allows us to prove the  $O(1/K)$  convergence, while the second term in the conventional metric fails.  $\square$

With our proposed convergence metric in (9), we have the following convergence result:

**Theorem 1.** Under Assumptions 1–3, choose step-sizes:  $\alpha \leq \min\{\frac{1}{4L_f}, \frac{2\mu}{34L_f^2 + 2\mu^2}\}$  and  $\beta \leq \min\{\frac{1}{4L_f}, \frac{1}{2(L_f + L_f^2/\mu)}, \frac{\mu}{8\sqrt{17}L_f^2}, \frac{\mu^2\alpha}{8\sqrt{34}L_f^2}\}$ . Let  $q = \sqrt{M}$  and  $S = \sqrt{M}$ , it holds that:

$$\frac{1}{K} \sum_{k=0}^{K-1} \mathbb{E}[\mathfrak{M}^{(k)}] \leq \frac{1}{K \min\{1, L_f^2\}} \left[ \frac{16L_f^2}{\alpha\mu} C_2 + \frac{2}{\beta} C_1 \right] = \mathcal{O}\left(\frac{1}{K}\right),$$

where  $C_1 \triangleq \mathbb{E}[J(\theta^{(0)})] - \mathbb{E}[J(\theta^{(*)})]$  and  $C_2 \triangleq (\mathbb{E}\|\omega^*(\theta^{(0)}) - \omega^{(0)}\|^2)$ .

**Corollary 2.** The overall stochastic sample complexity is  $\mathcal{O}(\sqrt{M}\kappa^3\epsilon^{-1} + M)$ . Note that  $\kappa = L_f/\mu$  denotes the condition number.

**Remark.** Theorem 1 states that VRPD achieves an  $\mathcal{O}(1/K)$  convergence rate to an  $\epsilon$ -FOSP. The most challenging part in proving Theorem 1 stems from the fact that one needs to simultaneously evaluate the progresses of the gradient descent in the primal domain and the gradient ascent in the dual domain of the minimax problem.

Toward this end, the nPD-VR method in (Wai et al., 2019) employs  $\|\nabla_{\omega} \mathcal{L}(\theta^{(k)}, \omega^{(k)})\|^2$  in their metric to evaluate convergence. However, this approach yields a term  $F^{(K)} \triangleq \mathbb{E}[\mathcal{L}(\theta^{(0)}, \omega^{(0)}) - \mathcal{L}(\theta^{(K)}, \omega^{(K)})]$  in their convergence upper bound in the form of  $\mathcal{O}(F^{(K)}/K)$  (cf. Theorem 1, Eq. (26) in (Wai et al., 2019)). Since  $F^{(K)}$  depends on  $K$ , it is unclear whether or not the nPD-VR method in (Wai et al., 2019) can achieve an  $\mathcal{O}(1/K)$  convergence rate. This unsatisfactory result motivates us to propose a new metric  $\mathfrak{M}^{(k)}$  in Eq. (9) to evaluate the convergence of our VRPD algorithm. The first part of our convergence metric  $\|\nabla J(\theta^{(k)})\|^2$  measures the *stationarity gap* of the primal variable, while the second part  $2\|\omega^{(k)} - \omega^*(\theta^{(k)})\|^2$  measures the dual *optimality gap*. Consequently, we bound per-iteration change in  $J(\theta)$  instead of the function  $\mathcal{L}(\theta^{(k)}, \omega^{(k)})$ . This helps us avoid the technical limitations of (Wai et al., 2019) and successfully establish the  $\mathcal{O}(1/K)$  convergence rate, hence resolving an open problem in this area.  $\square$

**Remark.** VRPD adopts a large  $\mathcal{O}(1)$  (i.e., constant) step-size compared to the  $\mathcal{O}(1/M)$  step-size of nPD-VR (Wai et al., 2019), where  $M$  is the dataset size. This also induces a faster convergence. Also, VRPD’s estimator uses fresher information from the previous iteration, while VR-STSG (Qiu

**Algorithm 2** Adaptive-batch VRPD method (VRPD<sup>+</sup>).

---

**Input:** A trajectory of the state-action pairs  $\{s_1, a_1, s_2, a_2, \dots, s_M, a_M, s_{M+1}\}$  generated from a given policy; step sizes  $\alpha, \beta \geq 0$ ; initialization points  $\theta^0 \in \Theta, \omega^0 \in \mathbb{R}^d$ .

**Output:**  $(\theta^{(\tilde{K})}, \omega^{(\tilde{K})})$ , where  $\tilde{K}$  is independently and uniformly picked from  $\{1, \dots, K\}$ ;

- 1: **for**  $k = 0, 1, 2, \dots, K - 1$  **do**
- 2:     If  $\text{mod}(k, q) = 0$ , select  $\mathcal{N}_s$  indices independently and uniformly from  $[M]$  as in Eq. (10) and calculate stochastic gradients as in Eq. (11);
- 3:     Otherwise, select  $S$  independently and uniformly from  $[M]$ ; Compute gradients as in Eq. (7);
- 4:     Perform the primal-dual updates as in Eq. (8).
- 5: **end for**

---

et al., 2020) and nPD-VR (Wai et al., 2019) only use the information from the beginning of  $q$ -sized windows. Collectively, VRPD makes a considerably larger progress than state-of-the-art algorithms (Qiu et al., 2020; Wai et al., 2019).  $\square$

4.2 THE ADAPTIVE-BATCH VRPD METHOD (VRPD<sup>+</sup>)

Note that VRPD still requires full gradients every  $q$  iterations, which may entail a high sample complexity. Upon closer observations, we note that accurate gradient estimation plays an important role *only* in the later stage of the convergence process. This motivates us to further lower the sample complexity of VRPD by using *adaptive batch sizes*. Toward this end, we propose an adaptive-batch VRPD method (VRPD<sup>+</sup>) to lower the sample complexity of the VRPD algorithm in Algorithm 1.

**1) Algorithm Description:** The full description of VRPD<sup>+</sup> is illustrated in Algorithm 2. In VRPD<sup>+</sup>, our key idea is to use the gradients calculated in the previous loop to adjust the batch size  $\mathcal{N}_s$  of the next loop. Specifically, VRPD<sup>+</sup> chooses  $\mathcal{N}_s$  in the  $k$ -th iteration as:

$$\mathcal{N}_s = \min\{c_\gamma \sigma^2 (\gamma^{(k)})^{-1}, c_\epsilon \sigma^2 \epsilon^{-1}, M\}, \quad (10)$$

where  $c_\gamma, c_\epsilon > c$  for certain constant  $c$ ,  $M$  denotes the size of the dataset and  $\sigma^2$  is the variance bound, and  $\gamma^{(k+1)} = \sum_{i=(n_k-1)q}^k \frac{\|G_\theta^{(i)}\|^2}{q}$  is the stochastic gradients calculated in the previous iterations. In VRPD<sup>+</sup>, for every  $q$  iterations, we select  $\mathcal{N}_s$  samples independently and uniformly from  $[M]$  and compute gradient estimators as follows:

$$G_\theta^{(k)} = \frac{1}{|\mathcal{N}_s|} \sum_{i \in \mathcal{N}_s} \nabla_\theta \mathcal{L}_i(\theta^{(k)}, \omega^{(k)}); \quad G_\omega^{(k)} = \frac{1}{|\mathcal{N}_s|} \sum_{i \in \mathcal{N}_s} \nabla_\omega \mathcal{L}_i(\theta^{(k)}, \omega^{(k)}). \quad (11)$$

For other iterations, VRPD<sup>+</sup> is exactly the same as VRPD. Next, we will theoretically show that such an adaptive batch-size scheme still retains the same convergence rate, while achieving an improved sample complexity.

**2) Convergence Performance:** For VRPD<sup>+</sup>, we have the following convergence performance result:

**Theorem 3.** Under Assumptions 1–3, choose step-sizes:  $\alpha \leq \min\{\frac{1}{4L_f}, \frac{2\mu}{34L_f^2 + 2\mu^2}\}$  and  $\beta \leq \min\{\frac{1}{4L_f}, \frac{1}{2(L_f + L_f^2/\mu)}, \frac{\mu}{8\sqrt{17}L_f^2}, \frac{\mu^2\alpha}{8\sqrt{34}L_f^2}\}$ . Let  $q = \sqrt{M}$ ,  $S = \sqrt{M}$  and  $c_\gamma \geq (288L_f^2/\mu^2 + 8)$  in VRPD<sup>+</sup>, where  $c_\gamma \geq c$  for some constant  $c > 4K + \frac{68K}{\beta\mu^2}$ . With constants  $C_1 \triangleq \mathbb{E}[J(\theta^{(0)})] - \mathbb{E}[J(\theta^{(*)})]$  and  $C_2 \triangleq (\mathbb{E}[\|\omega^*(\theta^{(0)}) - \omega^{(0)}\|^2])$ , it holds that:

$$\frac{1}{K} \sum_{k=0}^{K-1} \mathbb{E}[\mathfrak{M}^{(k)}] \leq \frac{1}{K \min\{1, L_f^2\}} \left[ K \cdot \frac{\epsilon}{2} + \frac{16L_f^2}{\alpha\mu} C_2 + \frac{2}{\beta} C_1 \right] = \mathcal{O}\left(\frac{1}{K}\right) + \frac{\epsilon}{2}.$$

**Corollary 4.** The overall stochastic sample complexity is  $\mathcal{O}(\sqrt{M}\kappa^3\epsilon^{-1} + M)$ .  $\kappa = L_f/\mu$  denotes the condition number.

**Remark.** From Theorem 3, it can be seen that VRPD<sup>+</sup> achieves the same convergence rate as that of VRPD. Since we choose the subsample set  $\mathcal{N}_s$  instead of full gradient calculation in VRPD<sup>+</sup>, it achieves a much lower sample complexity compared to VRPD. Additionally, the convergence performance of VRPD<sup>+</sup> is affected by the constant  $\frac{K\epsilon}{2}$ , which is due to the use of the adaptive batch size in each outer-loop of VRPD<sup>+</sup>. Also, it can be observed that the algorithm convergence rate is affected by the carefully chosen step-sizes  $\alpha$  and  $\beta$ , because either a too small or too large step-size may have negative impact on the convergence of the algorithm.  $\square$



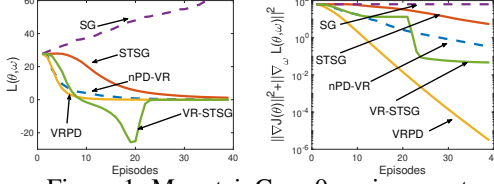

Figure 1: MountainCar-v0 environment.

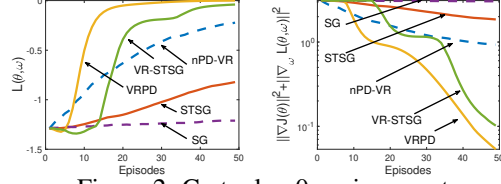

Figure 2: Cartpole-v0 environment.

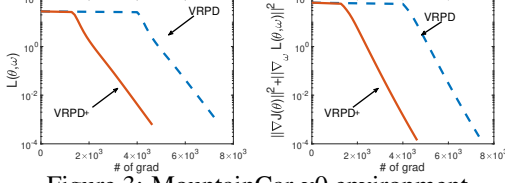

Figure 3: MountainCar-v0 environment.

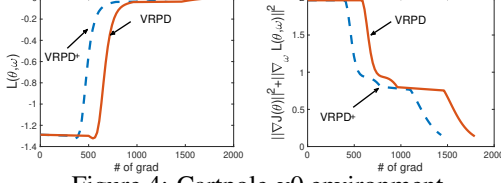

Figure 4: Cartpole-v0 environment.

**Remark.** The proof of Theorem 3 follows from a similar approach to the proof of Theorem 1. The key difference and most challenging part of proving Theorem 3 stem from the relaxation on  $\|\nabla_{\theta} \mathcal{L}(\theta^{(k)}, \omega^{(k)}) - G_{\theta}^{(k)}\|^2$  and  $\|\nabla_{\omega} \mathcal{L}(\theta^{(k)}, \omega^{(k)}) - G_{\omega}^{(k)}\|^2$ . Thanks to the bounded variance in Assumption 3 and the selected  $\mathcal{N}_s$  in Eq. (10), we are able to derive outer-loop bounds for primal and dual gaps, respectively. We refer readers to the Appendix for the details of the complete proof.  $\square$

## 5 EXPERIMENTAL RESULTS

In this section, we conduct numerical experiments to verify our theoretical results. We compare our work with the basic stochastic gradient (SG) method (Lin et al., 2020b) and three state-of-the-art algorithms for PE: nPD-VR (Wai et al., 2019), STSG (Qiu et al., 2020) and VR-STSG (Qiu et al., 2020). **Due to space limitation, we provide our detailed experiment setting**

**Numerical Results:** We set the constant learning rates  $\alpha = 10^{-3}$ ,  $\beta = 10^{-1}$ , mini-batch size  $q = \lceil \sqrt{M} \rceil$ , constant  $c = 32$  and solution accuracy  $\epsilon = 10^{-3}$ . First, we compare the loss value and gradient norm performance based on MountainCar-v0 and Cartpole-v0 with nPD-VR, SG, STSG, and VR-STSG in Figs. 1 and 2. We set the constraint  $\mathcal{W} = [0, 10]^n$  and initialize all algorithms at the same point, which is generated randomly from the normal distribution. We can see that VR-STSG and nPD-VR slowly converge after 40 epochs, while STSG and SG fail to converge. VRPD converges faster than all the other algorithms with the same step-size values. As for Cartpole-v0, we clearly see a trend of approaching zero-loss with VRPD. These results are consistent with our theoretical result that one can use a relatively large step-size with VRPD, which leads to faster convergence. Also, we compare the sample complexity of VRPD and VRPD<sup>+</sup> in MountainCar-v0 and Cartpole-v0, and the results are shown in in Figs. 3 and 4, respectively. We can see that VRPD<sup>+</sup> converges to the same level with much fewer samples than VRPD does. Next, we compared the mean squared error(MSE) between the ground truth value function and the estimated value function over 10 independent runs with linear approximation and nonlinear approximation. In Fig. 5, with the same amount of parameter size, nonlinear approximation always achieves smaller MSE than linear approximation (Du et al., 2017). Further experiments on the performance of  $J(\theta)$  are shown in the supplementary material.

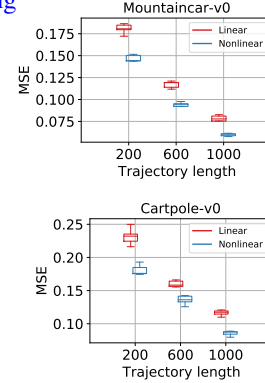

Figure 5: MSE comparison with 10 trials.

## 6 CONCLUSION

In this paper, we proposed and analyzed two algorithms called VRPD and VRPD<sup>+</sup> for policy evaluation with nonlinear approximation. The VRPD algorithm is based on a simple single-timescale framework by utilizing variance reduction techniques. The VRPD algorithm allows the use of constant step-sizes and achieves an  $\mathcal{O}(1/K)$  convergence rate. The VRPD<sup>+</sup> algorithm improves VRPD by further applying an adaptive batch size based on historical stochastic gradient information. Our experimental results also confirmed our theoretical findings in convergence and sample complexity.

## REFERENCES

- Reza Babanezhad, Mohamed Osama Ahmed, Alim Virani, Mark Jakub Schmidt, and Scott Sallinen. Stop wasting my gradients: Practical svrg. *arXiv preprint arXiv:1511.01942*, 2015.
- Dimitri P Bertsekas and John N Tsitsiklis. Neuro-dynamic programming: an overview. In *Proceedings of 1995 34th IEEE Conference on Decision and Control*, volume 1, pp. 560–564. IEEE, 1995.
- Shalabh Bhatnagar, Doina Precup, David Silver, Richard S Sutton, Hamid R Maei, and Csaba Szepesvári. Convergent temporal-difference learning with arbitrary smooth function approximation. In *Advances in Neural Information Processing Systems*, pp. 1204–1212, 2009.
- Justin A Boyan. Technical update: Least-squares temporal difference learning. *Machine learning*, 49(2-3):233–246, 2002.
- Steven J Bradtke and Andrew G Barto. Linear least-squares algorithms for temporal difference learning. *Machine learning*, 22(1-3):33–57, 1996.
- Greg Brockman, Vicki Cheung, Ludwig Pettersson, Jonas Schneider, John Schulman, Jie Tang, and Wojciech Zaremba. Openai gym. *arXiv preprint arXiv:1606.01540*, 2016.
- Wesley Chung, Somjit Nath, Ajin Joseph, and Martha White. Two-timescale networks for nonlinear value function approximation. In *International Conference on Learning Representations*, 2018.
- Christoph Dann, Gerhard Neumann, Jan Peters, et al. Policy evaluation with temporal differences: A survey and comparison. *Journal of Machine Learning Research*, 15:809–883, 2014.
- Constantinos Daskalakis, Stratis Skoulakis, and Manolis Zampetakis. The complexity of constrained min-max optimization. In *Proceedings of the 53rd Annual ACM SIGACT Symposium on Theory of Computing*, pp. 1466–1478, 2021.
- Aaron Defazio, Francis Bach, and Simon Lacoste-Julien. Saga: A fast incremental gradient method with support for non-strongly convex composite objectives. *arXiv preprint arXiv:1407.0202*, 2014.
- Thinh Doan, Siva Maguluri, and Justin Romberg. Finite-time analysis of distributed td (0) with linear function approximation on multi-agent reinforcement learning. In *International Conference on Machine Learning*, pp. 1626–1635. PMLR, 2019.
- Simon S Du, Jianshu Chen, Lihong Li, Lin Xiao, and Dengyong Zhou. Stochastic variance reduction methods for policy evaluation. *arXiv preprint arXiv:1702.07944*, 2017.
- Cong Fang, Chris Junchi Li, Zhouchen Lin, and Tong Zhang. Spider: Near-optimal non-convex optimization via stochastic path-integrated differential estimator. In *Advances in Neural Information Processing Systems*, pp. 689–699, 2018.
- Kaiyi Ji, Zhe Wang, Bowen Weng, Yi Zhou, Wei Zhang, and Yingbin Liang. History-gradient aided batch size adaptation for variance reduced algorithms. In *International Conference on Machine Learning*, pp. 4762–4772. PMLR, 2020.
- Chi Jin, Praneeth Netrapalli, and Michael Jordan. What is local optimality in nonconvex-nonconcave minimax optimization? In *International conference on machine learning*, pp. 4880–4889. PMLR, 2020.
- Rie Johnson and Tong Zhang. Accelerating stochastic gradient descent using predictive variance reduction. In *Advances in neural information processing systems*, pp. 315–323, 2013.
- Jens Kober, J Andrew Bagnell, and Jan Peters. Reinforcement learning in robotics: A survey. *The International Journal of Robotics Research*, 32(11):1238–1274, 2013.
- Michail G Lagoudakis and Ronald Parr. Least-squares policy iteration. *Journal of machine learning research*, 4(Dec):1107–1149, 2003.
- Lihua Lei and Michael I Jordan. On the adaptivity of stochastic gradient-based optimization. *SIAM Journal on Optimization*, 30(2):1473–1500, 2020.

- Lihua Lei, Cheng Ju, Jianbo Chen, and Michael I Jordan. Non-convex finite-sum optimization via scsg methods. In I. Guyon, U. V. Luxburg, S. Bengio, H. Wallach, R. Fergus, S. Vishwanathan, and R. Garnett (eds.), *Advances in Neural Information Processing Systems*, volume 30, pp. 2348–2358. Curran Associates, Inc., 2017.
- Sergey Levine, Chelsea Finn, Trevor Darrell, and Pieter Abbeel. End-to-end training of deep visuomotor policies. *The Journal of Machine Learning Research*, 17(1):1334–1373, 2016.
- Xiangru Lian, Mengdi Wang, and Ji Liu. Finite-sum composition optimization via variance reduced gradient descent. In *Artificial Intelligence and Statistics*, pp. 1159–1167. PMLR, 2017.
- Tianyi Lin, Chengyou Fan, Mengdi Wang, and Michael I Jordan. Improved sample complexity for stochastic compositional variance reduced gradient. In *2020 American Control Conference (ACC)*, pp. 126–131. IEEE, 2020a.
- Tianyi Lin, Chi Jin, and Michael Jordan. On gradient descent ascent for nonconvex-concave minimax problems. In *International Conference on Machine Learning*, pp. 6083–6093. PMLR, 2020b.
- Bo Liu, Ji Liu, Mohammad Ghavamzadeh, Sridhar Mahadevan, and Marek Petrik. Finite-sample analysis of proximal gradient td algorithms. In *UAI*, pp. 504–513. Citeseer, 2015.
- Bo Liu, Ian Gemp, Mohammad Ghavamzadeh, Ji Liu, Sridhar Mahadevan, and Marek Petrik. Proximal gradient temporal difference learning: Stable reinforcement learning with polynomial sample complexity. *Journal of Artificial Intelligence Research*, 63:461–494, 2018.
- Songtao Lu, Ioannis Tsaknakis, Mingyi Hong, and Yongxin Chen. Hybrid block successive approximation for one-sided non-convex min-max problems: algorithms and applications. *IEEE Transactions on Signal Processing*, 68:3676–3691, 2020.
- Luo Luo, Haishan Ye, Zhichao Huang, and Tong Zhang. Stochastic recursive gradient descent ascent for stochastic nonconvex-strongly-concave minimax problems. *arXiv preprint arXiv:2001.03724*, 2020.
- Sergio Valcarcel Macua, Jianshu Chen, Santiago Zazo, and Ali H Sayed. Distributed policy evaluation under multiple behavior strategies. *IEEE Transactions on Automatic Control*, 60(5):1260–1274, 2014.
- Hamid Reza Maei, Csaba Szepesvari, Shalabh Bhatnagar, Doina Precup, David Silver, and Richard S Sutton. Convergent temporal-difference learning with arbitrary smooth function approximation. In *NIPS*, pp. 1204–1212, 2009.
- Oren Mangoubi and Nisheeth K Vishnoi. Greedy adversarial equilibrium: an efficient alternative to nonconvex-nonconcave min-max optimization. In *Proceedings of the 53rd Annual ACM SIGACT Symposium on Theory of Computing*, pp. 896–909, 2021.
- Hongzi Mao, Mohammad Alizadeh, Ishai Menache, and Srikanth Kandula. Resource management with deep reinforcement learning. In *Proceedings of the 15th ACM Workshop on Hot Topics in Networks*, pp. 50–56, 2016.
- Yurii Nesterov et al. *Lectures on convex optimization*, volume 137. Springer, 2018.
- Maher Nouiehed, Maziar Sanjabi, Tianjian Huang, Jason D Lee, and Meisam Razaviyayn. Solving a class of non-convex min-max games using iterative first order methods. *Advances in Neural Information Processing Systems*, 32, 2019.
- Brenden K Petersen, Jiachen Yang, Will S Grathwohl, Chase Cockrell, Claudio Santiago, Gary An, and Daniel M Faissol. Deep reinforcement learning and simulation as a path toward precision medicine. *Journal of Computational Biology*, 26(6):597–604, 2019.
- Shuang Qiu, Zhuoran Yang, Xiaohan Wei, Jieping Ye, and Zhaoran Wang. Single-timescale stochastic nonconvex-concave optimization for smooth nonlinear td learning. *arXiv preprint arXiv:2008.10103*, 2020.

- Aniruddh Raghu, Matthieu Komorowski, Imran Ahmed, Leo Celi, Peter Szolovits, and Marzyeh Ghassemi. Deep reinforcement learning for sepsis treatment. *arXiv preprint arXiv:1711.09602*, 2017a.
- Aniruddh Raghu, Matthieu Komorowski, Leo Anthony Celi, Peter Szolovits, and Marzyeh Ghassemi. Continuous state-space models for optimal sepsis treatment-a deep reinforcement learning approach. *arXiv preprint arXiv:1705.08422*, 2017b.
- Herbert Robbins and Sutton Monro. A stochastic approximation method. *The annals of mathematical statistics*, pp. 400–407, 1951.
- Scott Sievert. Improving the convergence of sgd via adaptive batch sizes. *arXiv preprint arXiv:1910.08222*, 2019.
- Chaobing Song, Zhengyuan Zhou, Yichao Zhou, Yong Jiang, and Yi Ma. Optimistic dual extrapolation for coherent non-monotone variational inequalities. *Advances in Neural Information Processing Systems*, 33:14303–14314, 2020.
- Rayadurgam Srikant and Lei Ying. Finite-time error bounds for linear stochastic approximation and td learning. In *Conference on Learning Theory*, pp. 2803–2830. PMLR, 2019.
- Milos S Stankovic and Srdjan S Stankovic. Multi-agent temporal-difference learning with linear function approximation: Weak convergence under time-varying network topologies. In *2016 American Control Conference (ACC)*, pp. 167–172. IEEE, 2016.
- Richard S Sutton. Learning to predict by the methods of temporal differences. *Machine learning*, 3(1):9–44, 1988.
- Richard S Sutton, Csaba Szepesvári, and Hamid Reza Maei. A convergent  $o(n)$  algorithm for off-policy temporal-difference learning with linear function approximation. *Advances in neural information processing systems*, 21(21):1609–1616, 2008.
- Richard S Sutton, Hamid R Maei, and Csaba Szepesvári. A convergent  $o(n)$  temporal-difference algorithm for off-policy learning with linear function approximation. In *Advances in neural information processing systems*, pp. 1609–1616, 2009a.
- Richard S Sutton, Hamid Reza Maei, Doina Precup, Shalabh Bhatnagar, David Silver, Csaba Szepesvári, and Eric Wiewiora. Fast gradient-descent methods for temporal-difference learning with linear function approximation. In *Proceedings of the 26th Annual International Conference on Machine Learning*, pp. 993–1000, 2009b.
- Gerald Tesauro, Nicholas K Jong, Rajarshi Das, and Mohamed N Bennani. A hybrid reinforcement learning approach to autonomic resource allocation. In *2006 IEEE International Conference on Autonomic Computing*, pp. 65–73. IEEE, 2006.
- Georgios Theodorou, Philip S Thomas, and Mohammad Ghavamzadeh. Personalized ad recommendation systems for life-time value optimization with guarantees. In *Twenty-Fourth International Joint Conference on Artificial Intelligence*, 2015.
- Ahmed Touati, Pierre-Luc Bacon, Doina Precup, and Pascal Vincent. Convergent tree backup and retrace with function approximation. In *International Conference on Machine Learning*, pp. 4955–4964. PMLR, 2018.
- John N Tsitsiklis and Benjamin Van Roy. Analysis of temporal-difference learning with function approximation. In *Advances in neural information processing systems*, pp. 1075–1081, 1997.
- Hoi-To Wai, Mingyi Hong, Zhuoran Yang, Zhaoran Wang, and Kexin Tang. Variance reduced policy evaluation with smooth function approximation. In *Advances in Neural Information Processing Systems*, pp. 5784–5795, 2019.
- Mengdi Wang, Ji Liu, and Ethan X Fang. Accelerating stochastic composition optimization. *arXiv preprint arXiv:1607.07329*, 2016.

- Mengdi Wang, Ethan X Fang, and Han Liu. Stochastic compositional gradient descent: algorithms for minimizing compositions of expected-value functions. *Mathematical Programming*, 161(1-2): 419–449, 2017.
- Yuanhao Wang, Guodong Zhang, and Jimmy Ba. On solving minimax optimization locally: A follow-the-ridge approach. *arXiv preprint arXiv:1910.07512*, 2019.
- Zhe Wang, Kaiyi Ji, Yi Zhou, Yingbin Liang, and Vahid Tarokh. Spiderboost: A class of faster variance-reduced algorithms for nonconvex optimization. *arXiv preprint arXiv:1810.10690*, 2018.
- Tengyu Xu, Zhe Wang, Yingbin Liang, and H Vincent Poor. Enhanced first and zeroth order variance reduced algorithms for min-max optimization. 2020a.
- Tengyu Xu, Zhe Wang, Yi Zhou, and Yingbin Liang. Reanalysis of variance reduced temporal difference learning. *arXiv preprint arXiv:2001.01898*, 2020b.
- Junyu Zhang and Lin Xiao. A stochastic composite gradient method with incremental variance reduction. *arXiv preprint arXiv:1906.10186*, 2019.
- Siqi Zhang, Junchi Yang, Cristóbal Guzmán, Negar Kiyavash, and Niao He. The complexity of nonconvex-strongly-concave minimax optimization. *arXiv preprint arXiv:2103.15888*, 2021.
- Xingyu Zhou. On the fenchel duality between strong convexity and lipschitz continuous gradient. *arXiv preprint arXiv:1803.06573*, 2018.

## Supplementary Material

### 7 ADDITIONAL RELATED WORKS.

#### 7.1 VARIANCE-REDUCED STOCHASTIC GRADIENT APPROACHES

The study for solving large-scale statistical learning problems with the basic stochastic gradient descent (SGD) algorithm dates back to Robbins & Monro (1951). Variance-reduced (VR) techniques, such as SVRG Johnson & Zhang (2013), SAGA Defazio et al. (2014), SCGD Lian et al. (2017), SPIDER Fang et al. (2018) and SpiderBoost Wang et al. (2018), have been shown to improve the convergence rate of vanilla SGD for both convex and non-convex optimization problems. However, one major limitation of variance-reduced approaches is that most of them require a *double-loop* structure, where each outer loop iteration requires a full gradient evaluation, thus inducing high sample complexity. Recently, researchers studied the use of adaptive batch sizes to further lower the sample complexity for VR-based methods. For example, Babanezhad et al. (2015) and Lei & Jordan (2020) used exponential increasing batch sizes in each outer-loop iteration for SVRG and SCSG, respectively. Sievert (2019) and Ji et al. (2020) proposed to adapt the batch size to historical gradient information. Besides traditional supervised learning, this paper shows that our VR-based algorithms with adaptive batch size can also be used to attain substantial performance improvements for policy evaluation with nonlinear value function approximation in reinforcement learning.

#### 7.2 MIN-MAX OPTIMIZATION PROBLEM

In the nonconvex-nonconcave setting in min-max learning, research has focused on the convergence properties of learning algorithms Wang et al. (2019); Mangoubi & Vishnoi (2021), when the goal is only to compute locally optimal solution. One of the recent work of Daskalakis et al. (2021) shows that, for general smooth objectives, the computation of even approximate first-order locally optimal min-max solutions is intractable. Lateral, the method in Song et al. (2020) achieves the convergence rates  $\mathcal{O}(1/\sqrt{K})$ , which under the assumption that an Minty variational inequality(MVI) solution exists. In the nonconvex-concave setting in min-max learning, research have emerged as a focus in optimization problem Jin et al. (2020); Nouiehed et al. (2019); Lin et al. (2020b); Lu et al. (2020). However, these methods still suffers high sample complexities, where  $\mathcal{O}(\epsilon^{-6})$  gradient evaluations and  $\mathcal{O}(\epsilon^{-8})$  stochastic gradient evaluations.

### 8 FURTHER EXPERIMENTS AND ADDITIONAL RESULTS

**Simulation Environment:** We tested our stated algorithms across multiple tasks from the OpenAI Gym benchmark (Brockman et al., 2016), including the simulation environments MountainCar-v0 and Cartpole-v0. Note that the state spaces in MountainCar-v0 and CartPole -v0 are not tabular and both contain a continuous state space, which means that there are an *infinite* number of state action pairs in both environments. All experiments were performed using Python 3 on a 2.3 GHz Dual-Core Intel Core i5 desktop.

#### 8.1 STOCHASTIC ALGORITHMS FOR COMPARISONS:

- 1) *SGLin et al. (2020b)*: Stochastic gradient method randomly picks one data sample  $\xi_i$  from the whole data set and updates both primal and dual variables with stochastic gradients  $\nabla_{\theta}\mathcal{L}$  and  $\nabla_{\omega}\mathcal{L}$  in each iteration.
- 2) *nPD-VR Wai et al. (2019)*: nPD-VR is a SAGA-type algorithm proposed for minimax optimization. The method employs unbiased gradient estimates. In each iteration, it computes a stochastic gradient vector as the average of stochastic gradients evaluated at the previous iteration. Specifically, at iteration  $k$ , an approximated gradient of each function has been stored and is iteratively updated to build an estimate with reduced variance.
- 3) *STSG Qiu et al. (2020)*: The single-timescale and stochastic gradient algorithm (STSG) for non-convex primal-dual problem implements momentum updates for both primal and dual variables. The update requires only one data sample  $\xi_i$  at each iteration. In particular, the stated algorithm leads the updated gradient to be a recursive average of the historical stochastic gradients.



- 4) *VR-STSG* Qiu et al. (2020): The updates of the parameters  $\theta$  and  $\omega$  follow similar rules as those in STSG, but apply variance reduction on the primal-dual momentum updates. The associated stochastic gradients are evaluated with the previous parameters and current ones.

## 8.2 ALGORITHMS COMPARISON

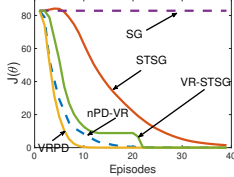

Figure 6: Algorithm performance under MountainCar-v0.

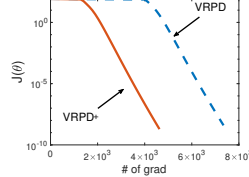

Figure 7: Algorithm performance under Cartpole-v0.

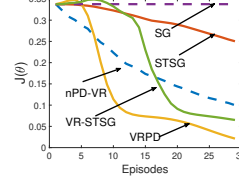

Figure 8: J-function comparison.

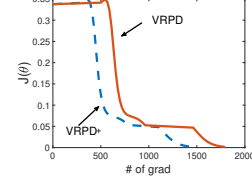

Figure 9: MSE comparison.

Fig.6, Fig.7 and Fig.9 show the additional results of the experimental settings in Section 5. The data size is fixed at  $M = 1000$ . Recall that  $J(\theta) = \mathcal{L}(\theta, \omega^*) = \max_{\omega \in \mathcal{W}} \mathcal{L}(\theta, \omega)$ . We note that minimizing  $J(\theta)$  is the same as finding the stationary point of  $\mathcal{L}(\theta, \omega)$ . We can see that VRPD converges faster than other algorithms with the same step-size values on both MountainCar-v0 and Cartpole-v0. Besides, VRPD<sup>+</sup> converges to the same level with much fewer samples than VRPD does. For additional experiments, we compare Mean Squared Error with the ground truth value function and the estimated value function over 3 runs. The ground truth can be calculated using tabular policy evaluation and the estimated value function is learned by our stated algorithm SRVR. We apply the same experimental settings as our paper. The MSE under MountainCar-v0 is  $0.0484 \pm 0.0026$  and MSE under Cartpole-v0 is  $0.0653 \pm 0.0031$ . In Fig. 9, we compare the MSE value with nPD-VR, SG, STSG, and VR-STSG under MountainCar-v0 environment. We can see that VRPD and VRPD<sup>+</sup> achieve smaller MSE than all other algorithms and the MSE value decreases as the training data size increases. We can thus see that VRPD<sup>+</sup> outperforms all other algorithms in terms of  $J(\theta)$ .

Figs. 12-15 show the convergence performance of VRPD with different learning rates  $\alpha$  and  $\beta$  via MountainCar-v0 and Cartpole-v0. We first run SARSA to obtain a good policy and then generate  $M = 500$  state-action pairs. Next, we parametrize  $V_\theta(\cdot)$  using a 2-hidden-layer neural network with 50 hidden neurons and apply the Sigmoid activation function at each unit. We set the constraints  $\mathcal{W} = [0, 10]^n$  and randomly initialize the same point from the normal distribution. Since excessive learning rates will result in larger fluctuations in loss value function, we fixed a relatively small learning rate  $\beta = 10^{-3}$  while varying  $\alpha$ , and fixed  $\alpha = 10^{-3}$  while varying  $\beta$ . In this experiment, we observe that the obtained curves by applying VRPD and VRPD<sup>+</sup> with a smaller learning rate have a smaller slope in the figure, which leads to a slower convergence.

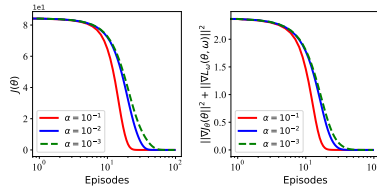

Figure 10: Algorithm performance under different step-size  $\alpha$ .

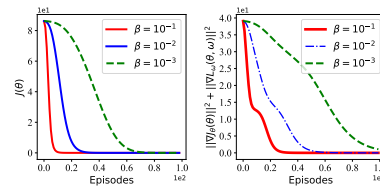

Figure 11: Algorithm performance under different step-size  $\beta$ .

Figure 12: Trajectory of the VRPD under MountainCar-v0 dataset.

Furthermore, we apply our algorithms to the Navigation task in Brockman et al. (2016). We note that the state space under the Navigation task has 30 dimensions. We initialize the parameters from the normal distribution for all the algorithms and learning rates are fixed at 0.1. The convergence

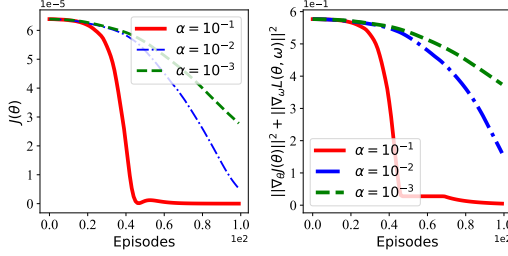Figure 13: Algorithm performance under different step-size  $\alpha$ .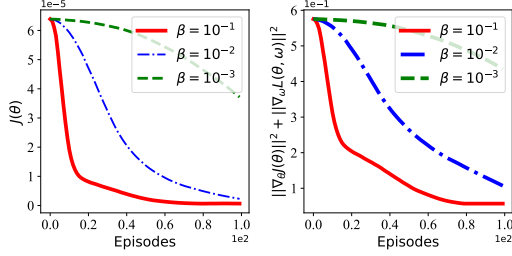Figure 14: Algorithm performance under different step-size  $\beta$ .

Figure 15: Trajectory of the VRPD under Cartpole-v0 dataset.

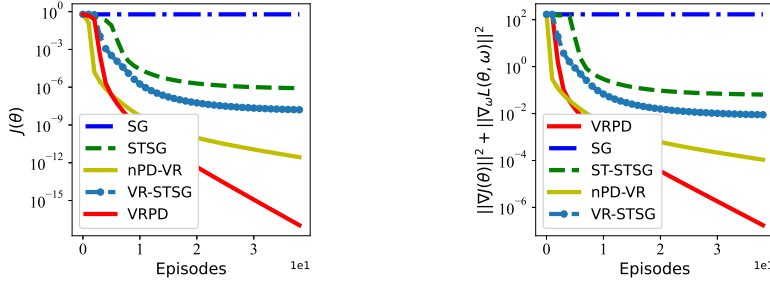

Figure 16: Performance comparison in Navigation task.

performance are shown in 16. Thus, our stated algorithm VRPD also has better converges performance in high-dimensional tasks.

## 9 SUPPORTING LEMMAS

To prove Theorem 1-3, we need the following lemmas.

**Lemma 1.** (Lemma 4.3 in Lin et al. (2020b).) Under the stated Assumptions 1-2, the gradient of the function  $J(\theta) = \max_{\omega \in \Omega} \mathcal{L}(\theta, \omega)$  wrt.  $\theta$  is  $L_J$ -Lipschitz continuous, i.e.,

$$\|\nabla J(\theta) - \nabla J(\theta')\| \leq L_J \|\theta - \theta'\|, \forall \theta, \theta' \in \Theta, \quad (12)$$

where the Lipschitz constant is

$$L_J = L_f + \frac{L_f^2}{\mu}. \quad (13)$$

**Lemma 2.** (Lemma 4.3 in Lin et al. (2020b).) Under the stated Assumptions 1-2, the mapping  $\omega^*(\theta) = \arg\max_{\omega \in \Omega} \mathcal{L}(\theta, \omega)$  is  $L_\omega$ -Lipschitz continuous, i.e.,

$$\|\omega^*(\theta) - \omega^*(\theta')\| \leq L_\omega \|\theta - \theta'\|, \forall \theta, \theta' \in \Theta, \quad (14)$$

where the Lipschitz constant is

$$L_\omega = \frac{L_f}{\mu}. \quad (15)$$

**Lemma 3.** Under Assumption 2, the function  $J(\theta) = \mathcal{L}(\theta, \omega^*(\theta))$  satisfies that  $\nabla J(\theta) = \nabla_\theta \mathcal{L}(\theta, \omega^*(\theta))$ .

*Proof.* Let  $\partial \mathcal{L}(\theta, \omega) / \partial \theta$  and  $\partial \mathcal{L}(\theta, \omega) / \partial \omega$  be the partial differential of  $\mathcal{L}(\theta, \omega)$  with respect to  $\theta$  and  $\omega$ , respectively. According to the chain rule, we have

$$dJ(\theta) = \frac{\partial \mathcal{L}(\theta, \omega)}{\partial \theta} \Big|_{\omega=\omega^*(\theta)} \cdot d\theta + \frac{\partial \mathcal{L}(\theta, \omega)}{\partial \omega} \Big|_{\omega=\omega^*(\theta)} \cdot \frac{\partial \omega^*(\theta)}{\partial \theta} \cdot d\theta. \quad (16)$$

Since  $\omega^*(\theta) = \operatorname{argmax}_{\omega \in \Omega} \mathcal{L}(\theta, \omega)$ , it follows that  $\frac{\partial \mathcal{L}(\theta, \omega)}{\partial \omega} \Big|_{\omega=\omega^*(\theta)} = 0$  for all  $\theta$ . Also, from Lemma 2, we have  $\partial \omega^*(\theta) / \partial \theta$  is bounded. Thus, we have  $dJ(\theta) = \frac{\partial \mathcal{L}(\theta, \omega)}{\partial \theta} \Big|_{\omega=\omega^*(\theta)} \cdot d\theta$ , which is  $\nabla J(\theta) = \nabla_{\theta} \mathcal{L}(\theta, \omega^*(\theta))$ .  $\square$

**Lemma 4.** *Under the stated Assumptions 1-2, for all  $(n_k - 1)q + 1 \leq k \leq n_k q - 1$ , with the update rule of Variance-Reduced Primal-Dual Stochastic Gradient Method (VRPD) in Algorithm 1, we have*

$$\begin{aligned} \mathbb{E} \|\nabla_{\theta} \mathcal{L}(\theta^{(k)}, \omega^{(k)}) - G_{\theta}^{(k)}\|^2 &\leq \mathbb{E} \|\nabla_{\theta} \mathcal{L}(\theta^{((n_k-1)q)}, \omega^{((n_k-1)q)}) - G_{\theta}^{((n_k-1)q)}\|^2 \\ &+ \frac{L_f^2}{|S|} \sum_{i=(n_k-1)q}^{k-1} \mathbb{E} \|\theta^{(i+1)} - \theta^{(i)}\|^2 + \frac{L_f^2}{|S|} \sum_{i=(n_k-1)q}^{k-1} \mathbb{E} \|\omega^{(i+1)} - \omega^{(i)}\|^2, \end{aligned} \quad (17)$$

$$\begin{aligned} \mathbb{E} \|\nabla_{\omega} \mathcal{L}(\theta^{(k)}, \omega^{(k)}) - G_{\omega}^{(k)}\|^2 &\leq \mathbb{E} \|\nabla_{\omega} \mathcal{L}(\theta^{((n_k-1)q)}, \omega^{((n_k-1)q)}) - G_{\omega}^{((n_k-1)q)}\|^2 \\ &+ \frac{L_f^2}{|S|} \sum_{i=(n_k-1)q}^{k-1} \mathbb{E} \|\theta^{(i+1)} - \theta^{(i)}\|^2 + \frac{L_f^2}{|S|} \sum_{i=(n_k-1)q}^{k-1} \mathbb{E} \|\omega^{(i+1)} - \omega^{(i)}\|^2. \end{aligned} \quad (18)$$

*Proof.* To show (17), we have:

$$\begin{aligned} &\mathbb{E}_k \|\nabla_{\theta} \mathcal{L}(\theta^{(k)}, \omega^{(k)}) - G_{\theta}^{(k)}\|^2 \\ &\stackrel{(a)}{\leq} \frac{1}{|S|} \left[ \mathbb{E}_k \|\nabla_{\theta} \mathcal{L}(\theta^{(k)}, \omega^{(k)}) - \nabla_{\theta} \mathcal{L}(\theta^{(k-1)}, \omega^{(k-1)})\|^2 \right] + \mathbb{E}_k \|\nabla_{\theta} \mathcal{L}(\theta^{(k-1)}, \omega^{(k-1)}) - G_{\theta}^{(k-1)}\|^2 \\ &\stackrel{(b)}{\leq} \frac{L_f^2}{|S|} \left[ \mathbb{E}_k \|\theta^{(k)} - \theta^{(k-1)}\|^2 + \mathbb{E}_k \|\omega^{(k)} - \omega^{(k-1)}\|^2 \right] + \mathbb{E}_k \|\nabla_{\theta} \mathcal{L}(\theta^{(k-1)}, \omega^{(k-1)}) - G_{\theta}^{(k-1)}\|^2, \end{aligned} \quad (19)$$

where (a) follows from the gradient update rule and Lemma 1 in Wang et al. (2018), and (b) follows from  $L$ -smoothness of  $\nabla_{\theta} \mathcal{L}$  and  $\nabla_{\omega} \mathcal{L}$ . Next, using the iterated law of expectation and telescoping over  $k$  from  $(n_k - 1)q + 1$  to  $k$ , where  $k \leq n_k q - 1$ , we obtain that

$$\begin{aligned} \mathbb{E} \|\nabla_{\theta} \mathcal{L}(\theta^{(k)}, \omega^{(k)}) - G_{\theta}^{(k)}\|^2 &\leq \mathbb{E} \|\nabla_{\theta} \mathcal{L}(\theta^{((n_k-1)q)}, \omega^{((n_k-1)q)}) - G_{\theta}^{((n_k-1)q)}\|^2 \\ &+ \frac{L_f^2}{|S|} \sum_{i=(n_k-1)q}^{k-1} \mathbb{E} \|\theta^{(i+1)} - \theta^{(i)}\|^2 + \frac{L_f^2}{|S|} \sum_{i=(n_k-1)q}^{k-1} \mathbb{E} \|\omega^{(i+1)} - \omega^{(i)}\|^2. \end{aligned} \quad (20)$$

This proves the first part of Lemma 4. Similarly, to show (18), we have

$$\begin{aligned} &\mathbb{E}_k \|\nabla_{\omega} \mathcal{L}(\theta^{(k)}, \omega^{(k)}) - G_{\omega}^{(k)}\|^2 \\ &\leq \frac{1}{|S|} \left[ \mathbb{E}_k \|\nabla_{\omega} \mathcal{L}(\theta^{(k)}, \omega^{(k)}) - \nabla_{\omega} \mathcal{L}(\theta^{(k-1)}, \omega^{(k-1)})\|^2 \right] \\ &+ \mathbb{E}_k \|\nabla_{\omega} \mathcal{L}(\theta^{(k-1)}, \omega^{(k-1)}) - G_{\omega}^{(k-1)}\|^2 \\ &\leq \frac{L_f^2}{|S|} \left[ \mathbb{E}_k \|\theta^{(k)} - \theta^{(k-1)}\|^2 + \mathbb{E}_k \|\omega^{(k)} - \omega^{(k-1)}\|^2 \right] \\ &+ \mathbb{E}_k \|\nabla_{\omega} \mathcal{L}(\theta^{(k-1)}, \omega^{(k-1)}) - G_{\omega}^{(k-1)}\|^2. \end{aligned} \quad (21)$$

Telescoping over  $k$  from  $(n_k - 1)q + 1$  to  $k$ , where  $k \leq n_k q - 1$ , we obtain that

$$\begin{aligned} \mathbb{E} \|\nabla_{\omega} \mathcal{L}(\theta^{(k)}, \omega^{(k)}) - G_{\omega}^{(k)}\|^2 &\leq \mathbb{E} \|\nabla_{\omega} \mathcal{L}(\theta^{((n_k-1)q)}, \omega^{((n_k-1)q)}) - G_{\omega}^{((n_k-1)q)}\|^2 \\ &+ \frac{L_f^2}{|S|} \sum_{i=(n_k-1)q}^{k-1} \mathbb{E} \|\theta^{(i+1)} - \theta^{(i)}\|^2 + \frac{L_f^2}{|S|} \sum_{i=(n_k-1)q}^{k-1} \mathbb{E} \|\omega^{(i+1)} - \omega^{(i)}\|^2. \end{aligned} \quad (22)$$

This completes the proof.  $\square$

**Lemma 5.** *Under the stated Assumptions 1-2 and the update rule of in (8). Letting  $0 < \beta \leq \frac{1}{2(L_f + \frac{L_f^2}{\mu})}$ , we have:*

$$\begin{aligned} & J(\boldsymbol{\theta}^{(k+1)}) - J(\boldsymbol{\theta}^{(k)}) \\ & \leq -\frac{\beta}{2} \|\nabla J(\boldsymbol{\theta}^{(k)})\|^2 - \frac{\beta}{4} \|G_{\boldsymbol{\theta}}^{(k)}\|^2 + L_f^2 \beta \|\boldsymbol{\omega}^*(\boldsymbol{\theta}^{(k)}) - \boldsymbol{\omega}^{(k)}\|^2 + \beta \|\nabla_{\boldsymbol{\theta}} \mathcal{L}(\boldsymbol{\theta}^{(k)}, \boldsymbol{\omega}^{(k)}) - G_{\boldsymbol{\theta}}^{(k)}\|^2, \end{aligned} \quad (23)$$

where  $J(\boldsymbol{\theta}) \triangleq \max_{\boldsymbol{\omega} \in \Omega} \mathcal{L}(\boldsymbol{\theta}, \boldsymbol{\omega})$  and  $\boldsymbol{\omega}^*(\boldsymbol{\theta}) = \operatorname{argmax}_{\boldsymbol{\omega} \in \Omega} \mathcal{L}(\boldsymbol{\theta}, \boldsymbol{\omega})$ .

*Proof.* From Lemma 1,  $J(\boldsymbol{\theta})$  has as Lipschitz continuous gradients, which implies

$$J(\boldsymbol{\theta}^{(k+1)}) - J(\boldsymbol{\theta}^{(k)}) - \langle \nabla J(\boldsymbol{\theta}^{(k)}), \boldsymbol{\theta}^{(k+1)} - \boldsymbol{\theta}^{(k)} \rangle \leq \frac{L_J}{2} \|\boldsymbol{\theta}^{(k+1)} - \boldsymbol{\theta}^{(k)}\|^2. \quad (24)$$

By rearranging the terms, we have

$$\begin{aligned} & J(\boldsymbol{\theta}^{(k+1)}) - J(\boldsymbol{\theta}^{(k)}) \\ & \leq \langle \nabla J(\boldsymbol{\theta}^{(k)}), \boldsymbol{\theta}^{(k+1)} - \boldsymbol{\theta}^{(k)} \rangle + \frac{L_J}{2} \|\boldsymbol{\theta}^{(k+1)} - \boldsymbol{\theta}^{(k)}\|^2 \\ & = -\frac{\beta}{2} \|\nabla J(\boldsymbol{\theta}^{(k)})\|^2 - \left(\frac{\beta}{2} - \frac{L_J}{2}\right) \|\boldsymbol{\theta}^{(k+1)} - \boldsymbol{\theta}^{(k)}\|^2 \\ & \quad + \frac{\beta}{2} \|\nabla J(\boldsymbol{\theta}^{(k)}) - G_{\boldsymbol{\theta}}^{(k)}\|^2 \\ & = -\frac{\beta}{2} \|\nabla J(\boldsymbol{\theta}^{(k)})\|^2 - \left(\frac{\beta}{2} - \frac{L_J \beta^2}{2}\right) \|G_{\boldsymbol{\theta}}^{(k)}\|^2 \\ & \quad + \frac{\beta}{2} \|\nabla J(\boldsymbol{\theta}^{(k)}) - \nabla_{\boldsymbol{\theta}} \mathcal{L}(\boldsymbol{\theta}^{(k)}, \boldsymbol{\omega}^{(k)}) + \nabla_{\boldsymbol{\theta}} \mathcal{L}(\boldsymbol{\theta}^{(k)}, \boldsymbol{\omega}^{(k)}) - G_{\boldsymbol{\theta}}^{(k)}\|^2 \\ & \stackrel{(a)}{\leq} -\frac{\beta}{2} \|\nabla J(\boldsymbol{\theta}^{(k)})\|^2 - \left(\frac{\beta}{2} - \frac{L_J \beta^2}{2}\right) \|G_{\boldsymbol{\theta}}^{(k)}\|^2 \\ & \quad + \beta \|\nabla J(\boldsymbol{\theta}^{(k)}) - \nabla_{\boldsymbol{\theta}} \mathcal{L}(\boldsymbol{\theta}^{(k)}, \boldsymbol{\omega}^{(k)})\|^2 + \beta \|\nabla_{\boldsymbol{\theta}} \mathcal{L}(\boldsymbol{\theta}^{(k)}, \boldsymbol{\omega}^{(k)}) - G_{\boldsymbol{\theta}}^{(k)}\|^2 \\ & \stackrel{(b)}{\leq} -\frac{\beta}{2} \|\nabla J(\boldsymbol{\theta}^{(k)})\|^2 - \left(\frac{\beta}{2} - \frac{L_J \beta^2}{2}\right) \|G_{\boldsymbol{\theta}}^{(k)}\|^2 \\ & \quad + L_f^2 \beta \|\boldsymbol{\omega}^*(\boldsymbol{\theta}^{(k)}) - \boldsymbol{\omega}^{(k)}\|^2 + \beta \|\nabla_{\boldsymbol{\theta}} \mathcal{L}(\boldsymbol{\theta}^{(k)}, \boldsymbol{\omega}^{(k)}) - G_{\boldsymbol{\theta}}^{(k)}\|^2, \end{aligned} \quad (25)$$

where (a) is follow from the Young's inequality, and (b) follows from the  $L_f$ -Smoothness assumption. We can simplify the coefficient as

$$-\left(\frac{\beta}{2} - \frac{L_J \beta^2}{2}\right) \leq -\frac{1}{4} \beta, \quad (26)$$

by setting  $\beta \leq \frac{1}{2L_J}$ . Since  $L_f \geq \mu > 0$  and recall that  $L_J = L_f + \frac{L_f^2}{\mu}$  from Lemma.1, we obtain

$$\begin{aligned} & J(\boldsymbol{\theta}^{(k+1)}) - J(\boldsymbol{\theta}^{(k)}) \\ & \leq -\frac{\beta}{2} \|\nabla J(\boldsymbol{\theta}^{(k)})\|^2 - \frac{\beta}{4} \|G_{\boldsymbol{\theta}}^{(k)}\|^2 + L_f^2 \beta \|\boldsymbol{\omega}^*(\boldsymbol{\theta}^{(k)}) - \boldsymbol{\omega}^{(k)}\|^2 + \beta \|\nabla_{\boldsymbol{\theta}} \mathcal{L}(\boldsymbol{\theta}^{(k)}, \boldsymbol{\omega}^{(k)}) - G_{\boldsymbol{\theta}}^{(k)}\|^2. \end{aligned} \quad (27)$$

This completes the proof.  $\square$

**Lemma 6.** *Under the stated Assumptions 1-2, with the update rule in (8), letting  $0 < \alpha \leq \frac{1}{2L_f}$ , we have*

$$\begin{aligned} & \|\boldsymbol{\omega}^{(k+1)} - \boldsymbol{\omega}^*(\boldsymbol{\theta}^{(k)})\|^2 \\ & \leq -\frac{1}{4} \|\boldsymbol{\omega}^{(k+1)} - \boldsymbol{\omega}^{(k)}\|^2 + \frac{4\alpha}{\mu} \|\nabla_{\boldsymbol{\omega}} \mathcal{L}(\boldsymbol{\theta}^{(k)}, \boldsymbol{\omega}^{(k)}) - G_{\boldsymbol{\omega}}^{(k)}\|^2 + \left(1 - \frac{\alpha\mu}{2}\right) \|\boldsymbol{\omega}^*(\boldsymbol{\theta}^{(k)}) - \boldsymbol{\omega}^{(k)}\|^2, \end{aligned} \quad (28)$$

where  $\boldsymbol{\omega}^*(\boldsymbol{\theta}) = \operatorname{argmax}_{\boldsymbol{\omega} \in \mathbb{R}^d} \mathcal{L}(\boldsymbol{\theta}, \boldsymbol{\omega})$ .

*Proof.* First, we expand the  $\|\omega^{(k+1)} - \omega^*(\theta^{(k)})\|^2$  as follows:

$$\begin{aligned} \|\omega^{(k+1)} - \omega^*(\theta^{(k)})\|^2 &\stackrel{(a)}{=} \|\omega^{(k)} + (\omega^{(k+1)} - \omega^{(k)}) - \omega^*(\theta^{(k)})\|^2 \\ &= \|\omega^{(k)} - \omega^*(\theta^{(k)})\|^2 + \|(\omega^{(k+1)} - \omega^{(k)})\|^2 + 2\langle \omega^{(k+1)} - \omega^{(k)}, \omega^{(k)} - \omega^*(\theta^{(k)}) \rangle, \end{aligned} \quad (29)$$

where (a) follows from the update rule  $\omega^{(k+1)} = \omega^{(k)} + (\omega^{(k+1)} - \omega^{(k)})$ . Moreover, due to the strong concavity of  $\mathcal{L}(\theta^{(k)}, \omega^{(k)})$ , it follows that:

$$\mathcal{L}(\theta^{(k)}, \omega) \leq \mathcal{L}(\theta^{(k)}, \omega^{(k)}) + \langle \nabla_{\omega} \mathcal{L}(\theta^{(k)}, \omega^{(k)}), \omega - \omega^{(k)} \rangle - \frac{\mu}{2} \|\omega - \omega^{(k)}\|. \quad (30)$$

By rearranging terms, we have:

$$\begin{aligned} &\mathcal{L}(\theta^{(k)}, \omega) + \frac{\mu}{2} \|\omega - \omega^{(k)}\| \\ &\leq \mathcal{L}(\theta^{(k)}, \omega^{(k)}) + \langle \nabla_{\omega} \mathcal{L}(\theta^{(k)}, \omega^{(k)}), \omega^{(k+1)} - \omega^{(k)} \rangle + \langle G_{\omega}^{(k)}, \omega - \omega^{(k+1)} \rangle \\ &\quad + \langle \nabla_{\omega} \mathcal{L}(\theta^{(k)}, \omega^{(k)}) - G_{\omega}^{(k)}, \omega - \omega^{(k+1)} \rangle \\ &= \mathcal{L}(\theta^{(k)}, \omega^{(k)}) + \langle \nabla_{\omega} \mathcal{L}(\theta^{(k)}, \omega^{(k)}), \omega^{(k+1)} - \omega^{(k)} \rangle + \langle G_{\omega}^{(k)}, \omega - \omega^{(k+1)} \rangle \\ &\quad + \langle \nabla_{\omega} \mathcal{L}(\theta^{(k)}, \omega^{(k)}) - G_{\omega}^{(k)}, \omega - \omega^{(k+1)} \rangle - \frac{1}{4\alpha} \|\omega^{(k+1)} - \omega^{(k)}\|^2 + \frac{1}{4\alpha} \|\omega^{(k+1)} - \omega^{(k)}\|^2. \end{aligned} \quad (31)$$

Next, we can simplify  $-\frac{1}{4\alpha} \|\omega^{(k+1)} - \omega^{(k)}\|^2$  as

$$\begin{aligned} &-\frac{1}{4\alpha} \|\omega^{(k+1)} - \omega^{(k)}\|^2 \\ &\leq -\frac{L_f}{2} \|\omega^{(k+1)} - \omega^{(k)}\|^2 \\ &\leq \mathcal{L}(\theta^{(k)}, \omega^{(k+1)}) - \mathcal{L}(\theta^{(k)}, \omega^{(k)}) - \langle \nabla_{\omega} \mathcal{L}(\theta^{(k)}, \omega^{(k)}), \omega^{(k+1)} - \omega^{(k)} \rangle, \end{aligned} \quad (32)$$

by setting the parameter  $\alpha \leq \frac{1}{2L_f}$ .

Summing both sides of the two inequalities in (31) and (32), we have:

$$\begin{aligned} &\mathcal{L}(\theta^{(k)}, \omega) + \frac{\mu}{2} \|\omega - \omega^{(k)}\| \\ &\stackrel{(a)}{\leq} \mathcal{L}(\theta^{(k)}, \omega^{(k+1)}) + \frac{1}{\alpha} \langle \omega^{(k+1)} - \omega^{(k)}, \omega - \omega^{(k+1)} \rangle \\ &\quad + \langle \nabla_{\omega} \mathcal{L}(\theta^{(k)}, \omega^{(k)}) - G_{\omega}^{(k)}, \omega - \omega^{(k+1)} \rangle + \frac{1}{4\alpha} \|\omega^{(k+1)} - \omega^{(k)}\|^2 \\ &= \mathcal{L}(\theta^{(k)}, \omega^{(k+1)}) + \frac{1}{\alpha} \langle \omega^{(k+1)} - \omega^{(k)}, \omega^{(k)} - \omega^{(k+1)} \rangle + \frac{1}{\alpha} \langle \omega^{(k+1)} - \omega^{(k)}, \omega - \omega^{(k)} \rangle \\ &\quad + \langle \nabla_{\omega} \mathcal{L}(\theta^{(k)}, \omega^{(k)}) - G_{\omega}^{(k)}, \omega - \omega^{(k+1)} \rangle + \frac{1}{4\alpha} \|\omega^{(k+1)} - \omega^{(k)}\|^2 \\ &= \mathcal{L}(\theta^{(k)}, \omega^{(k+1)}) + \frac{1}{\alpha} \langle \omega^{(k+1)} - \omega^{(k)}, \omega - \omega^{(k)} \rangle \\ &\quad + \langle \nabla_{\omega} \mathcal{L}(\theta^{(k)}, \omega^{(k)}) - G_{\omega}^{(k)}, \omega - \omega^{(k+1)} \rangle - \frac{3}{4\alpha} \|\omega^{(k+1)} - \omega^{(k)}\|^2, \end{aligned} \quad (33)$$

where (a) follows from the optimality condition for the constrained optimization that  $\langle \omega^{(k+1)} - \omega^{(k)} + \alpha G_{\omega}^{(k)}, \omega - \omega^{(k+1)} \rangle \geq 0, \forall \omega \in \Omega$ . Let  $\omega = \omega^*(\theta^{(k)})$ . We obtain:

$$\begin{aligned} &\frac{\mu}{2} \|\omega^*(\theta^{(k)}) - \omega^{(k)}\| \\ &\stackrel{(a)}{\leq} \frac{1}{\alpha} \langle \omega^{(k+1)} - \omega^{(k)}, \omega^*(\theta^{(k)}) - \omega^{(k)} \rangle \\ &\quad + \langle \nabla_{\omega} \mathcal{L}(\theta^{(k)}, \omega^{(k)}) - G_{\omega}^{(k)}, \omega^*(\theta^{(k)}) - \omega^{(k+1)} \rangle - \frac{3}{4\alpha} \|\omega^{(k+1)} - \omega^{(k)}\|^2 \end{aligned}$$

$$\begin{aligned}
&= \frac{1}{\alpha} \langle \omega^{(k+1)} - \omega^{(k)}, \omega^*(\theta^{(k)}) - \omega^{(k)} \rangle - \frac{3}{4\alpha} \|\omega^{(k+1)} - \omega^{(k)}\|^2 \\
&\quad + \langle \nabla_{\omega} \mathcal{L}(\theta^{(k)}, \omega^{(k)}) - G_{\omega}^{(k)}, \omega^*(\theta^{(k)}) - \omega^{(k)} \rangle + \langle \nabla_{\omega} \mathcal{L}(\theta^{(k)}, \omega^{(k)}) - G_{\omega}^{(k)}, \omega^{(k)} - \omega^{(k+1)} \rangle \\
&\stackrel{(b)}{\leq} \frac{1}{\alpha} \langle \omega^{(k+1)} - \omega^{(k)}, \omega^*(\theta^{(k)}) - \omega^{(k)} \rangle - \frac{3}{4\alpha} \|\omega^{(k+1)} - \omega^{(k)}\|^2 \\
&\quad + \frac{1}{\mu} \|\nabla_{\omega} \mathcal{L}(\theta^{(k)}, \omega^{(k)}) - G_{\omega}^{(k)}\|^2 + \frac{\mu}{4} \|\omega^*(\theta^{(k)}) - \omega^{(k)}\|^2 \\
&\quad + \frac{1}{\mu} \|\nabla_{\omega} \mathcal{L}(\theta^{(k)}, \omega^{(k)}) - G_{\omega}^{(k)}\|^2 + \frac{\mu}{4} \|\omega^{(k)} - \omega^{(k+1)}\|^2 \\
&= \frac{1}{\alpha} \langle \omega^{(k+1)} - \omega^{(k)}, \omega^*(\theta^{(k)}) - \omega^{(k)} \rangle - \frac{3}{4\alpha} \|\omega^{(k+1)} - \omega^{(k)}\|^2 \\
&\quad + \frac{2}{\mu} \|\nabla_{\omega} \mathcal{L}(\theta^{(k)}, \omega^{(k)}) - G_{\omega}^{(k)}\|^2 + \frac{\mu}{4} \|\omega^*(\theta^{(k)}) - \omega^{(k)}\|^2 + \frac{\mu}{4} \|\omega^{(k)} - \omega^{(k+1)}\|^2, \tag{34}
\end{aligned}$$

where (a) follows from  $\mathcal{L}(\theta^{(k)}, \omega^*(\theta^{(k)})) \geq \mathcal{L}(\theta^{(k)}, \omega^{(k+1)})$  due to strong concavity and  $\omega^*(\theta) = \operatorname{argmax}_{\omega \in \mathbb{R}^d} \mathcal{L}(\theta, \omega)$  and (b) follows from Young's inequality.

Next, multiplying both sides by  $2\alpha$  and rearranging the terms, we obtain

$$\begin{aligned}
&2 \langle \omega^{(k+1)} - \omega^{(k)}, \omega^{(k)} - \omega^*(\theta^{(k)}) \rangle \\
&\leq -\alpha\mu \|\omega^*(\theta^{(k)}) - \omega^{(k)}\| - \frac{3}{2} \|\omega^{(k+1)} - \omega^{(k)}\|^2 \\
&\quad + \frac{4\alpha}{\mu} \|\nabla_{\omega} \mathcal{L}(\theta^{(k)}, \omega^{(k)}) - G_{\omega}^{(k)}\|^2 + \frac{\alpha\mu}{2} \|\omega^*(\theta^{(k)}) - \omega^{(k)}\|^2 + \frac{\mu\alpha}{2} \|\omega^{(k)} - \omega^{(k+1)}\|^2 \\
&= (\frac{\mu\alpha}{2} - \frac{3}{2}) \|\omega^{(k+1)} - \omega^{(k)}\|^2 + \frac{4\alpha}{\mu} \|\nabla_{\omega} \mathcal{L}(\theta^{(k)}, \omega^{(k)}) - G_{\omega}^{(k)}\|^2 - \frac{\alpha\mu}{2} \|\omega^*(\theta^{(k)}) - \omega^{(k)}\|^2. \tag{35}
\end{aligned}$$

Combining (35) and (29), we have

$$\begin{aligned}
&\|\omega^{(k+1)} - \omega^*(\theta^{(k)})\|^2 \\
&\leq \|\omega^{(k)} - \omega^*(\theta^{(k)})\|^2 + \|\omega^{(k+1)} - \omega^{(k)}\|^2 + (\frac{\mu\alpha}{2} - \frac{3}{2}) \|\omega^{(k+1)} - \omega^{(k)}\|^2 \\
&\quad + \frac{4\alpha}{\mu} \|\nabla_{\omega} \mathcal{L}(\theta^{(k)}, \omega^{(k)}) - G_{\omega}^{(k)}\|^2 - \frac{\alpha\mu}{2} \|\omega^*(\theta^{(k)}) - \omega^{(k)}\|^2 \\
&= \|\omega^{(k)} - \omega^*(\theta^{(k)})\|^2 + (\frac{\mu\alpha}{2} - \frac{1}{2}) \|\omega^{(k+1)} - \omega^{(k)}\|^2 \\
&\quad + \frac{4\alpha}{\mu} \|\nabla_{\omega} \mathcal{L}(\theta^{(k)}, \omega^{(k)}) - G_{\omega}^{(k)}\|^2 - \frac{\alpha\mu}{2} \|\omega^*(\theta^{(k)}) - \omega^{(k)}\|^2. \tag{36}
\end{aligned}$$

Next, we can simplify the above inequality as

$$\begin{aligned}
&\|\omega^{(k+1)} - \omega^*(\theta^{(k)})\|^2 \\
&\leq -\frac{1}{4} \|\omega^{(k+1)} - \omega^{(k)}\|^2 + \frac{4\alpha}{\mu} \|\nabla_{\omega} \mathcal{L}(\theta^{(k)}, \omega^{(k)}) - G_{\omega}^{(k)}\|^2 + (1 - \frac{\alpha\mu}{2}) \|\omega^*(\theta^{(k)}) - \omega^{(k)}\|^2, \tag{37}
\end{aligned}$$

by setting  $\alpha \leq \frac{1}{2\mu}$ . With the fact that  $\mu \leq L_f$ , setting  $\alpha \leq \frac{1}{2L_f}$  also yields the above inequality. This completes the proof.  $\square$

**Lemma 7.** Under the stated Assumptions 1-2, with the update rule in (8), letting  $\alpha \leq \frac{1}{4L_f}$ , we have

$$\|\omega^{(k+1)} - \omega^*(\theta^{(k+1)})\|^2 \leq -\frac{1}{4} \|\omega^{(k+1)} - \omega^{(k)}\|^2 + \frac{17}{4\alpha\mu} L_{\omega}^2 \|\theta^{k+1} - \theta^k\|^2$$



$$+ \frac{17\alpha}{4\mu} \|\nabla_{\omega} \mathcal{L}(\theta^{(k)}, \omega^{(k)}) - G_{\omega}^{(k)}\|^2 + (1 - \frac{\alpha\mu}{4}) \|\omega^*(\theta^{(k)}) - \omega^{(k)}\|^2, \quad (38)$$

where  $\omega^*(\theta) = \operatorname{argmax}_{\omega \in \mathbb{R}^d} \mathcal{L}(\theta, \omega)$ .

*Proof.* First, decompose the term  $\|\omega^{(k+1)} - \omega^*(\theta^{(k+1)})\|^2$  as follows

$$\begin{aligned} \|\omega^{(k+1)} - \omega^*(\theta^{(k+1)})\|^2 &= \|\omega^{(k+1)} - \omega^*(\theta^{(k)}) + \omega^*(\theta^{(k)}) - \omega^*(\theta^{(k+1)})\|^2 \\ &\stackrel{(a)}{\leq} (1 + \frac{\mu\alpha}{4}) \|\omega^{(k+1)} - \omega^*(\theta^{(k)})\|^2 + (1 + \frac{4}{\mu\alpha}) \|\omega^*(\theta^{(k)}) - \omega^*(\theta^{(k+1)})\|^2 \\ &\stackrel{(b)}{\leq} (1 + \frac{\mu\alpha}{4}) \|\omega^{(k+1)} - \omega^*(\theta^{(k)})\|^2 + (1 + \frac{4}{\mu\alpha}) L_{\omega}^2 \|\theta^{k+1} - \theta^k\|^2, \end{aligned} \quad (39)$$

where (a) follows from Young's inequality, and (b) follows from the Lipschitz continuity property of  $\omega^*(\theta^{(k)})$  as shown in Lemma 2.

From Lemma 6, we have

$$\begin{aligned} \|\omega^{(k+1)} - \omega^*(\theta^{(k)})\|^2 &\leq -\frac{1}{4} \|\omega^{(k+1)} - \omega^{(k)}\|^2 \\ &\quad + \frac{4\alpha}{\mu} \|\nabla_{\omega} \mathcal{L}(\theta^{(k)}, \omega^{(k)}) - G_{\omega}^{(k)}\|^2 + (1 - \frac{\alpha\mu}{2}) \|\omega^*(\theta^{(k)}) - \omega^{(k)}\|^2. \end{aligned} \quad (40)$$

Therefore, plugging (40) into (39), we obtain the following inequality

$$\begin{aligned} \|\omega^{(k+1)} - \omega^*(\theta^{(k+1)})\|^2 &\leq -\frac{1}{4} (1 + \frac{\mu\alpha}{4}) \|\omega^{(k+1)} - \omega^{(k)}\|^2 + (1 + \frac{4}{\mu\alpha}) L_{\omega}^2 \|\theta^{k+1} - \theta^k\|^2 \\ &\quad + (1 + \frac{\mu\alpha}{4}) \frac{4\alpha}{\mu} \|\nabla_{\omega} \mathcal{L}(\theta^{(k)}, \omega^{(k)}) - G_{\omega}^{(k)}\|^2 + (1 + \frac{\mu\alpha}{4}) (1 - \frac{\alpha\mu}{2}) \|\omega^*(\theta^{(k)}) - \omega^{(k)}\|^2. \end{aligned} \quad (41)$$

According to the conditions  $\alpha \leq \frac{1}{4L_f} \leq \frac{1}{4\mu}$ , we have

$$\begin{aligned} -\frac{1}{4} (1 + \frac{\mu\alpha}{4}) &\leq -\frac{1}{4}, \quad (1 + \frac{4}{\mu\alpha}) L_{\omega}^2 = \frac{\alpha\mu + 4}{\alpha\mu} L_{\omega}^2 \leq \frac{17}{4\alpha\mu} L_{\omega}^2, \\ (1 + \frac{\mu\alpha}{4}) \frac{4\alpha}{\mu} &\leq \frac{17\alpha}{4\mu}, \quad (1 + \frac{\mu\alpha}{4}) (1 - \frac{\alpha\mu}{2}) \leq 1 - \frac{\alpha\mu}{4}. \end{aligned} \quad (42)$$

Plugging (42) into (41) yields:

$$\begin{aligned} \|\omega^{(k+1)} - \omega^*(\theta^{(k+1)})\|^2 &\leq -\frac{1}{4} \|\omega^{(k+1)} - \omega^{(k)}\|^2 + \frac{17}{4\alpha\mu} L_{\omega}^2 \|\theta^{k+1} - \theta^k\|^2 \\ &\quad + \frac{17\alpha}{4\mu} \|\nabla_{\omega} \mathcal{L}(\theta^{(k)}, \omega^{(k)}) - G_{\omega}^{(k)}\|^2 + (1 - \frac{\alpha\mu}{4}) \|\omega^*(\theta^{(k)}) - \omega^{(k)}\|^2. \end{aligned} \quad (43)$$

This completes the proof,  $\square$

**Lemma 8.** Under the stated assumptions, with the update rule of Adaptive-Batch Variance-Reduced Primal-Dual Stochastic Gradient Method (VRPD<sup>+</sup>) in Algorithm 2, for all  $(n_k - 1)q + 1 \leq k \leq n_k q - 1$ , we have

$$\begin{aligned} &\mathbb{E} \|\nabla_{\theta} \mathcal{L}(\theta^{(k)}, \omega^{(k)}) - G_{\theta}^{(k)}\|^2 \\ &\leq \frac{I_{(\mathcal{N}_s \leq M)}}{\mathcal{N}_s} \sigma^2 + \frac{L_f^2}{|S|} \sum_{i=(n_k-1)q}^{k-1} \mathbb{E} \|\theta^{(i+1)} - \theta^{(i)}\|^2 + \frac{L_f^2}{|S|} \sum_{i=(n_k-1)q}^{k-1} \mathbb{E} \|\omega^{(i+1)} - \omega^{(i)}\|^2, \end{aligned} \quad (44)$$

$$\begin{aligned} &\mathbb{E} \|\nabla_{\omega} \mathcal{L}(\theta^{(k)}, \omega^{(k)}) - G_{\omega}^{(k)}\|^2 \\ &\leq \frac{I_{(\mathcal{N}_s \leq M)}}{\mathcal{N}_s} \sigma^2 + \frac{L_f^2}{|S|} \sum_{i=(n_k-1)q}^{k-1} \mathbb{E} \|\theta^{(i+1)} - \theta^{(i)}\|^2 + \frac{L_f^2}{|S|} \sum_{i=(n_k-1)q}^{k-1} \mathbb{E} \|\omega^{(i+1)} - \omega^{(i)}\|^2. \end{aligned} \quad (45)$$

*Proof.* To show (44), we have:

$$\begin{aligned}
\mathbb{E}_k \|\nabla_{\theta} \mathcal{L}(\theta^{(k)}, \omega^{(k)}) - G_{\theta}^{(k)}\|^2 &\stackrel{(a)}{\leq} \frac{1}{|S|} \left[ \mathbb{E}_k \|\nabla_{\theta} \mathcal{L}(\theta^{(k)}, \omega^{(k)}) - \nabla_{\theta} \mathcal{L}(\theta^{(k-1)}, \omega^{(k-1)})\|^2 \right] \\
&\quad + \mathbb{E}_k \|\nabla_{\theta} \mathcal{L}(\theta^{(k-1)}, \omega^{(k-1)}) - G_{\theta}^{(k-1)}\|^2 \\
&\stackrel{(b)}{\leq} \frac{L_f^2}{|S|} \left[ \mathbb{E}_k \|\theta^{(k)} - \theta^{(k-1)}\|^2 + \mathbb{E}_k \|\omega^{(k)} - \omega^{(k-1)}\|^2 \right] \\
&\quad + \mathbb{E}_k \|\nabla_{\theta} \mathcal{L}(\theta^{(k-1)}, \omega^{(k-1)}) - G_{\theta}^{(k-1)}\|^2, \tag{46}
\end{aligned}$$

where (a) follows from the gradient update rule and Lemma 1 in Wang et al. (2018), and (b) follows from  $L$ -smoothness of  $\nabla_{\theta} \mathcal{L}$  and  $\nabla_{\omega} \mathcal{L}$ . Next, using the iterated law of expectation and telescoping over  $k$  from  $(n_k - 1)q + 1$  to  $k$ , where  $k \leq n_k q - 1$ , we obtain that

$$\begin{aligned}
\mathbb{E} \|\nabla_{\theta} \mathcal{L}(\theta^{(k)}, \omega^{(k)}) - G_{\theta}^{(k)}\|^2 &\leq \mathbb{E} \|\nabla_{\theta} \mathcal{L}(\theta^{((n_k-1)q)}, \omega^{((n_k-1)q)}) - G_{\theta}^{((n_k-1)q)}\|^2 \\
&\quad + \frac{L_f^2}{|S|} \sum_{i=(n_k-1)q}^{k-1} \mathbb{E} \|\theta^{(i+1)} - \theta^{(i)}\|^2 + \frac{L_f^2}{|S|} \sum_{i=(n_k-1)q}^{k-1} \mathbb{E} \|\omega^{(i+1)} - \omega^{(i)}\|^2 \\
&\stackrel{(a)}{\leq} \frac{I_{(\mathcal{N}_s \leq M)}}{\mathcal{N}_s} \sigma^2 + \frac{L_f^2}{|S|} \sum_{i=(n_k-1)q}^{k-1} \mathbb{E} \|\theta^{(i+1)} - \theta^{(i)}\|^2 + \frac{L_f^2}{|S|} \sum_{i=(n_k-1)q}^{k-1} \mathbb{E} \|\omega^{(i+1)} - \omega^{(i)}\|^2, \tag{47}
\end{aligned}$$

where (a) follows from Lemma B.2 in Lei et al. (2017). This proves the first part of Lemma. Similarly, to show (45), we have

$$\begin{aligned}
\mathbb{E}_k \|\nabla_{\omega} \mathcal{L}(\theta^{(k)}, \omega^{(k)}) - G_{\omega}^{(k)}\|^2 &\leq \frac{1}{|S|} \left[ \mathbb{E}_k \|\nabla_{\omega} \mathcal{L}(\theta^{(k)}, \omega^{(k)}) - \nabla_{\omega} \mathcal{L}(\theta^{(k-1)}, \omega^{(k-1)})\|^2 \right] \\
&\quad + \mathbb{E}_k \|\nabla_{\omega} \mathcal{L}(\theta^{(k-1)}, \omega^{(k-1)}) - G_{\omega}^{(k-1)}\|^2 \\
&\leq \frac{L_f^2}{|S|} \left[ \mathbb{E}_k \|\theta^{(k)} - \theta^{(k-1)}\|^2 + \mathbb{E}_k \|\omega^{(k)} - \omega^{(k-1)}\|^2 \right] \\
&\quad + \mathbb{E}_k \|\nabla_{\omega} \mathcal{L}(\theta^{(k-1)}, \omega^{(k-1)}) - G_{\omega}^{(k-1)}\|^2. \tag{48}
\end{aligned}$$

Telescoping over  $k$  from  $(n_k - 1)q + 1$  to  $k$ , where  $k \leq n_k q - 1$ , we obtain that

$$\begin{aligned}
\mathbb{E} \|\nabla_{\omega} \mathcal{L}(\theta^{(k)}, \omega^{(k)}) - G_{\omega}^{(k)}\|^2 &\leq \mathbb{E} \|\nabla_{\omega} \mathcal{L}(\theta^{((n_k-1)q)}, \omega^{((n_k-1)q)}) - G_{\omega}^{((n_k-1)q)}\|^2 \\
&\quad + \frac{L_f^2}{|S|} \sum_{i=(n_k-1)q}^{k-1} \mathbb{E} \|\theta^{(i+1)} - \theta^{(i)}\|^2 + \frac{L_f^2}{|S|} \sum_{i=(n_k-1)q}^{k-1} \mathbb{E} \|\omega^{(i+1)} - \omega^{(i)}\|^2 \\
&\stackrel{(a)}{\leq} \frac{I_{(\mathcal{N}_s \leq M)}}{\mathcal{N}_s} \sigma^2 + \frac{L_f^2}{|S|} \sum_{i=(n_k-1)q}^{k-1} \mathbb{E} \|\theta^{(i+1)} - \theta^{(i)}\|^2 + \frac{L_f^2}{|S|} \sum_{i=(n_k-1)q}^{k-1} \mathbb{E} \|\omega^{(i+1)} - \omega^{(i)}\|^2, \tag{49}
\end{aligned}$$

where (a) follows from Lemma B.2 in Lei et al. (2017). This completes the proof.  $\square$

## 10 PROOF OF THEOREM 1

*Proof.* Taking expectation on both sides of Lemma 5 with respect to the randomness of the algorithm, we have

$$\begin{aligned}
&\mathbb{E}[J(\theta^{(k+1)}) - J(\theta^{(k)})] \\
&\leq -\frac{\beta}{2} \mathbb{E} \|\nabla J(\theta^{(k)})\|^2 - \frac{\beta}{4} \mathbb{E} \|G_{\theta}^{(k)}\|^2 + L_f^2 \beta \mathbb{E} \|\omega^*(\theta^{(k)}) - \omega^{(k)}\|^2 + \beta \mathbb{E} \|\nabla_{\theta} \mathcal{L}(\theta^{(k)}, \omega^{(k)}) - G_{\theta}^{(k)}\|^2 \\
&\stackrel{(a)}{\leq} \beta \left[ \mathbb{E} \|\nabla_{\theta} \mathcal{L}(\theta^{((n_k-1)q)}, \omega^{((n_k-1)q)}) - G_{\theta}^{((n_k-1)q)}\|^2 \right]
\end{aligned}$$

$$\begin{aligned}
& + \frac{L_f^2}{|S|} \sum_{i=(n_k-1)q}^{k-1} \mathbb{E} \|\boldsymbol{\theta}^{(i+1)} - \boldsymbol{\theta}^{(i)}\|^2 + \frac{L_f^2}{|S|} \sum_{i=(n_k-1)q}^{k-1} \mathbb{E} \|\boldsymbol{\omega}^{(i+1)} - \boldsymbol{\omega}^{(i)}\|^2 \\
& - \frac{\beta}{2} \mathbb{E} \|\nabla J(\boldsymbol{\theta}^{(k)})\|^2 - \frac{\beta}{4} \mathbb{E} \|G_{\boldsymbol{\theta}}^{(k)}\|^2 + L_f^2 \beta \mathbb{E} \|\boldsymbol{\omega}^*(\boldsymbol{\theta}^{(k)}) - \boldsymbol{\omega}^{(k)}\|^2 \\
& \stackrel{(b)}{=} \beta \left[ \frac{L_f^2}{|S|} \beta^2 \sum_{i=(n_k-1)q}^{k-1} \mathbb{E} \|G_{\boldsymbol{\theta}}^{(i)}\|^2 + \frac{L_f^2}{|S|} \sum_{i=(n_k-1)q}^{k-1} \mathbb{E} \|\boldsymbol{\omega}^{(i+1)} - \boldsymbol{\omega}^{(i)}\|^2 \right] \\
& - \frac{\beta}{2} \mathbb{E} \|\nabla J(\boldsymbol{\theta}^{(k)})\|^2 - \frac{\beta}{4} \mathbb{E} \|G_{\boldsymbol{\theta}}^{(k)}\|^2 + L_f^2 \beta \mathbb{E} \|\boldsymbol{\omega}^*(\boldsymbol{\theta}^{(k)}) - \boldsymbol{\omega}^{(k)}\|^2, \tag{50}
\end{aligned}$$

where (a) follows from Lemma 4 and (b) follows from the update rule of stated algorithm in (7) and  $\mathbb{E} \|\nabla_{\boldsymbol{\theta}} \mathcal{L}(\boldsymbol{\theta}^{((n_k-1)q)}, \boldsymbol{\omega}^{((n_k-1)q)}) - G_{\boldsymbol{\theta}}^{((n_k-1)q)}\|^2 = 0$ . Next, telescoping over  $k$  from  $(n_k - 1)q + 1$  to  $k$ , where  $k \leq n_k q - 1$ , we obtain that

$$\begin{aligned}
& \mathbb{E}[J(\boldsymbol{\theta}^{(k+1)}) - J(\boldsymbol{\theta}^{(n_k-1)q})] \\
& \leq \beta \left[ \frac{L_f^2}{|S|} \beta^2 \sum_{j=(n_k-1)q}^k \sum_{i=(n_k-1)q}^{j-1} \mathbb{E} \|G_{\boldsymbol{\theta}}^{(i)}\|^2 + \frac{L_f^2}{|S|} \sum_{j=(n_k-1)q}^k \sum_{i=(n_k-1)q}^{j-1} \mathbb{E} \|\boldsymbol{\omega}^{(i+1)} - \boldsymbol{\omega}^{(i)}\|^2 \right] \\
& + L_f^2 \beta \sum_{i=(n_k-1)q}^k \mathbb{E} \|\boldsymbol{\omega}^{(i)} - \boldsymbol{\omega}^*(\boldsymbol{\theta}^{(i)})\|^2 - \frac{1}{4} \beta \sum_{j=(n_k-1)q}^k \mathbb{E} \|G_{\boldsymbol{\theta}}^{(j)}\|^2 \\
& - \frac{\beta}{2} \sum_{i=(n_k-1)q}^k \mathbb{E} \|\nabla J(\boldsymbol{\theta}^{(i)})\|^2 \\
& \stackrel{(a)}{\leq} \beta \left[ \frac{L_f^2 \beta^2}{|S|} \sum_{j=(n_k-1)q}^k \sum_{i=(n_k-1)q}^k \mathbb{E} \|G_{\boldsymbol{\theta}}^{(i)}\|^2 - \frac{1}{2} \sum_{i=(n_k-1)q}^k \mathbb{E} \|\nabla J(\boldsymbol{\theta}^{(i)})\|^2 \right] \\
& + \frac{L_f^2}{|S|} \sum_{j=(n_k-1)q}^k \sum_{i=(n_k-1)q}^k \mathbb{E} \|\boldsymbol{\omega}^{(i+1)} - \boldsymbol{\omega}^{(i)}\|^2 \\
& + L_f^2 \beta \sum_{i=(n_k-1)q}^k \mathbb{E} \|\boldsymbol{\omega}^{(i)} - \boldsymbol{\omega}^*(\boldsymbol{\theta}^{(i)})\|^2 - \frac{1}{4} \beta \sum_{j=(n_k-1)q}^k \mathbb{E} \|G_{\boldsymbol{\theta}}^{(j)}\|^2 \\
& \stackrel{(b)}{\leq} \beta \left[ \frac{L_f^2 \beta^2}{|S|} q \sum_{i=(n_k-1)q}^k \mathbb{E} \|G_{\boldsymbol{\theta}}^{(i)}\|^2 - \frac{1}{2} \sum_{i=(n_k-1)q}^k \mathbb{E} \|\nabla J(\boldsymbol{\theta}^{(i)})\|^2 \right] \\
& + \frac{L_f^2}{|S|} q \sum_{i=(n_k-1)q}^k \mathbb{E} \|\boldsymbol{\omega}^{(i+1)} - \boldsymbol{\omega}^{(i)}\|^2 \\
& + L_f^2 \beta \sum_{i=(n_k-1)q}^k \mathbb{E} \|\boldsymbol{\omega}^{(i)} - \boldsymbol{\omega}^*(\boldsymbol{\theta}^{(i)})\|^2 - \frac{1}{4} \beta \sum_{j=(n_k-1)q}^k \mathbb{E} \|G_{\boldsymbol{\theta}}^{(j)}\|^2 \\
& = \left( \frac{\beta^3 L_f^2}{|S|} q - \frac{1}{4} \beta \right) \sum_{i=(n_k-1)q}^k \mathbb{E} \|G_{\boldsymbol{\theta}}^{(i)}\|^2 - \frac{\beta}{2} \sum_{i=(n_k-1)q}^k \mathbb{E} \|\nabla J(\boldsymbol{\theta}^{(i)})\|^2 \\
& + \frac{\beta L_f^2}{|S|} q \sum_{i=(n_k-1)q}^k \mathbb{E} \|\boldsymbol{\omega}^{(i+1)} - \boldsymbol{\omega}^{(i)}\|^2 \\
& + L_f^2 \beta \sum_{i=(n_k-1)q}^k \mathbb{E} \|\boldsymbol{\omega}^{(i)} - \boldsymbol{\omega}^*(\boldsymbol{\theta}^{(i)})\|^2, \tag{51}
\end{aligned}$$

where (a) extends the summation of second term from  $j - 1$  to  $k$ , and (b) follows from the fact that  $k \leq n_k q - 1$ . We continue the proof by further deriving

$$\begin{aligned}
& \mathbb{E}J(\boldsymbol{\theta}^{(K)}) - \mathbb{E}J(\boldsymbol{\theta}^{(0)}) \\
&= \mathbb{E}J(\boldsymbol{\theta}^{(q)}) - \mathbb{E}J(\boldsymbol{\theta}^{(0)}) + \mathbb{E}J(\boldsymbol{\theta}^{(2q)}) - \mathbb{E}J(\boldsymbol{\theta}^{(q)}) + \mathbb{E}J(\boldsymbol{\theta}^{(K)}) - \mathbb{E}J(\boldsymbol{\theta}^{((n_K-1)q)}) \\
&\stackrel{(a)}{\leq} \left( \frac{\beta^3 L_f^2}{|S|} q - \frac{1}{4} \beta \right) \sum_{i=0}^{K-1} \mathbb{E}\|G_{\boldsymbol{\theta}}^{(i)}\|^2 + \frac{\beta L_f^2}{|S|} q \sum_{i=0}^{K-1} \mathbb{E}\|\boldsymbol{\omega}^{(i+1)} - \boldsymbol{\omega}^{(i)}\|^2 \\
&\quad + L_f^2 \beta \sum_{i=0}^{K-1} \mathbb{E}\|\boldsymbol{\omega}^{(i)} - \boldsymbol{\omega}^*(\boldsymbol{\theta}^{(i)})\|^2 - \frac{\beta}{2} \sum_{i=0}^K \mathbb{E}\|\nabla J(\boldsymbol{\theta}^{(i)})\|^2, \tag{52}
\end{aligned}$$

where (a) follows from (51).

By taking expectation on both sides of Lemma 7 with respect to the randomness of the algorithm, we have

$$\begin{aligned}
& \mathbb{E}\|\boldsymbol{\omega}^{(k+1)} - \boldsymbol{\omega}^*(\boldsymbol{\theta}^{(k+1)})\|^2 \leq -\frac{1}{4} \mathbb{E}\|\boldsymbol{\omega}^{(k+1)} - \boldsymbol{\omega}^{(k)}\|^2 + \frac{17}{4\alpha\mu} L_{\omega}^2 \mathbb{E}\|\boldsymbol{\theta}^{k+1} - \boldsymbol{\theta}^k\|^2 \\
&\quad + \frac{17\alpha}{4\mu} \mathbb{E}\|\nabla_{\omega} \mathcal{L}(\boldsymbol{\theta}^{(k)}, \boldsymbol{\omega}^{(k)}) - G_{\omega}^{(k)}\|^2 + (1 - \frac{\alpha\mu}{4}) \mathbb{E}\|\boldsymbol{\omega}^*(\boldsymbol{\theta}^{(k)}) - \boldsymbol{\omega}^{(k)}\|^2 \\
&\stackrel{(a)}{\leq} -\frac{1}{4} \mathbb{E}\|\boldsymbol{\omega}^{(k+1)} - \boldsymbol{\omega}^{(k)}\|^2 + \frac{17\beta^2}{4\alpha\mu} L_{\omega}^2 \mathbb{E}\|G_{\boldsymbol{\theta}}^k\|^2 + (1 - \frac{\alpha\mu}{4}) \mathbb{E}\|\boldsymbol{\omega}^*(\boldsymbol{\theta}^{(k)}) - \boldsymbol{\omega}^{(k)}\|^2 \\
&\quad + \frac{17\alpha}{4\mu} [\mathbb{E}\|\nabla_{\omega} \mathcal{L}(\boldsymbol{\theta}^{((n_k-1)q)}, \boldsymbol{\omega}^{((n_k-1)q)}) - G_{\omega}^{((n_k-1)q)}\|^2 \\
&\quad + \frac{L_f^2}{|S|} \sum_{i=(n_k-1)q}^{k-1} \mathbb{E}\|\boldsymbol{\theta}^{(i+1)} - \boldsymbol{\theta}^{(i)}\|^2 + \frac{L_f^2}{|S|} \sum_{i=(n_k-1)q}^{k-1} \mathbb{E}\|\boldsymbol{\omega}^{(i+1)} - \boldsymbol{\omega}^{(i)}\|^2] \\
&\stackrel{(b)}{\leq} -\frac{1}{4} \mathbb{E}\|\boldsymbol{\omega}^{(k+1)} - \boldsymbol{\omega}^{(k)}\|^2 + \frac{17\beta^2}{4\alpha\mu} L_{\omega}^2 \mathbb{E}\|G_{\boldsymbol{\theta}}^k\|^2 + (1 - \frac{\alpha\mu}{4}) \mathbb{E}\|\boldsymbol{\omega}^*(\boldsymbol{\theta}^{(k)}) - \boldsymbol{\omega}^{(k)}\|^2 \\
&\quad + \frac{17\alpha}{4\mu} \left[ \frac{L_f^2}{|S|} \beta^2 \sum_{i=(n_k-1)q}^{k-1} \mathbb{E}\|G_{\boldsymbol{\theta}}^{(i)}\|^2 + \frac{L_f^2}{|S|} \sum_{i=(n_k-1)q}^{k-1} \mathbb{E}\|\boldsymbol{\omega}^{(i+1)} - \boldsymbol{\omega}^{(i)}\|^2 \right], \tag{53}
\end{aligned}$$

where (a) follows from Lemma 4, and (b) follows from the update rule of stated algorithm in 7 and  $\|\nabla_{\omega} \mathcal{L}(\boldsymbol{\theta}^{((n_k-1)q)}, \boldsymbol{\omega}^{((n_k-1)q)}) - G_{\omega}^{((n_k-1)q)}\|^2 = 0$ . Next, summing up both sides of (53) from  $i = k$  to  $i = (n_k - 1)q$  yields

$$\begin{aligned}
& \mathbb{E}\|\boldsymbol{\omega}^{(k+1)} - \boldsymbol{\omega}^*(\boldsymbol{\theta}^{(k+1)})\|^2 - \mathbb{E}\|\boldsymbol{\omega}^*(\boldsymbol{\theta}^{(n_k-1)q}) - \boldsymbol{\omega}^{(n_k-1)q}\|^2 \\
&\leq -\frac{1}{4} \sum_{i=(n_k-1)q}^k \mathbb{E}\|\boldsymbol{\omega}^{(i+1)} - \boldsymbol{\omega}^{(i)}\|^2 + \frac{17\beta^2}{4\alpha\mu} L_{\omega}^2 \sum_{i=(n_k-1)q}^k \mathbb{E}\|G_{\boldsymbol{\theta}}^{(i)}\|^2 \\
&\quad - \frac{\alpha\mu}{4} \sum_{i=(n_k-1)q}^k \mathbb{E}\|\boldsymbol{\omega}^*(\boldsymbol{\theta}^{(i)}) - \boldsymbol{\omega}^{(i)}\|^2 \\
&\quad + \frac{17\alpha}{4\mu} \left[ \frac{L_f^2}{|S|} \beta^2 \sum_{j=(n_k-1)q}^k \sum_{i=(n_k-1)q}^{j-1} \mathbb{E}\|G_{\boldsymbol{\theta}}^{(i)}\|^2 + \frac{L_f^2}{|S|} \sum_{j=(n_k-1)q}^k \sum_{i=(n_k-1)q}^{j-1} \mathbb{E}\|\boldsymbol{\omega}^{(i+1)} - \boldsymbol{\omega}^{(i)}\|^2 \right] \\
&\stackrel{(a)}{\leq} -\frac{1}{4} \sum_{i=(n_k-1)q}^k \mathbb{E}\|\boldsymbol{\omega}^{(i+1)} - \boldsymbol{\omega}^{(i)}\|^2 + \frac{17\beta^2}{4\alpha\mu} L_{\omega}^2 \sum_{i=(n_k-1)q}^k \mathbb{E}\|G_{\boldsymbol{\theta}}^{(i)}\|^2 \\
&\quad - \frac{\alpha\mu}{4} \sum_{i=(n_k-1)q}^k \mathbb{E}\|\boldsymbol{\omega}^*(\boldsymbol{\theta}^{(i)}) - \boldsymbol{\omega}^{(i)}\|^2 \\
&\quad + \frac{17\alpha}{4\mu} \left[ \frac{\beta^2 L_f^2}{|S|} \sum_{j=(n_k-1)q}^k \sum_{i=(n_k-1)q}^k \mathbb{E}\|G_{\boldsymbol{\theta}}^{(i)}\|^2 + \frac{L_f^2}{|S|} \sum_{j=(n_k-1)q}^k \sum_{i=(n_k-1)q}^k \mathbb{E}\|\boldsymbol{\omega}^{(i+1)} - \boldsymbol{\omega}^{(i)}\|^2 \right]
\end{aligned}$$

$$\begin{aligned}
&\stackrel{(b)}{\leq} -\frac{1}{4} \sum_{i=(n_k-1)q}^k \mathbb{E}\|\omega^{(i+1)} - \omega^{(i)}\|^2 + \frac{17\beta^2}{4\alpha\mu} L_\omega^2 \sum_{i=(n_k-1)q}^k \mathbb{E}\|G_\theta^{(i)}\|^2 \\
&\quad - \frac{\alpha\mu}{4} \sum_{i=(n_k-1)q}^k \mathbb{E}\|\omega^*(\theta^{(i)}) - \omega^{(i)}\|^2 \\
&\quad + \frac{17\alpha}{4\mu} \left[ \frac{\beta^2 L_f^2}{|S|} q \sum_{i=(n_k-1)q}^k \mathbb{E}\|G_\theta^{(i)}\|^2 + \frac{L_f^2}{|S|} q \sum_{i=(n_k-1)q}^k \mathbb{E}\|\omega^{(i+1)} - \omega^{(i)}\|^2 \right], \tag{54}
\end{aligned}$$

where (a) extends the summation of second term from  $j-1$  to  $k$ , and (b) follows from the fact that  $k \leq n_k q - 1$ . We continue the proof by further driving

$$\begin{aligned}
&\mathbb{E}\|\omega^{(K)} - \omega^*(\theta^{(K)})\|^2 - \mathbb{E}\|\omega^*(\theta^{(0)}) - \omega^{(0)}\|^2 \\
&= \mathbb{E}\|\omega^{(q)} - \omega^*(\theta^{(q)})\|^2 - \mathbb{E}\|\omega^*(\theta^{(0)}) - \omega^{(0)}\|^2 + \mathbb{E}\|\omega^{(2q)} - \omega^*(\theta^{(2q)})\|^2 \\
&\quad - \mathbb{E}\|\omega^*(\theta^{(q)}) - \omega^{(q)}\|^2 + \dots + \mathbb{E}\|\omega^{(K)} - \omega^*(\theta^{(K)})\|^2 - \mathbb{E}\|\omega^*(\theta^{(n_K-1)q}) - \omega^{(n_K-1)q}\|^2 \\
&\leq -\frac{1}{4} \sum_{i=0}^{K-1} \mathbb{E}\|\omega^{(i+1)} - \omega^{(i)}\|^2 + \frac{17}{4\alpha\mu} L_\omega^2 \sum_{i=0}^{K-1} \mathbb{E}\|\theta^{(i+1)} - \theta^{(i)}\|^2 \\
&\quad - \frac{\alpha\mu}{4} \sum_{i=0}^{K-1} \mathbb{E}\|\omega^*(\theta^{(i)}) - \omega^{(i)}\|^2 + \frac{17\alpha}{4\mu} \left[ \frac{\beta^2 L_f^2}{|S|} q \sum_{i=0}^{K-1} \mathbb{E}\|G_\theta^{(i)}\|^2 \right. \\
&\quad \left. + \frac{L_f^2}{|S|} q \sum_{i=0}^{K-1} \mathbb{E}\|\omega^{(i+1)} - \omega^{(i)}\|^2 \right]. \tag{55}
\end{aligned}$$

Next, multiplying both sides by  $\frac{8\beta L_f^2}{\alpha\mu}$  and rearranging the above terms, we obtain

$$\begin{aligned}
&2\beta L_f^2 \sum_{i=0}^{K-1} \mathbb{E}\|\omega^*(\theta^{(i)}) - \omega^{(i)}\|^2 \\
&\leq -\frac{2\beta L_f^2}{\alpha\mu} \sum_{i=0}^{K-1} \mathbb{E}\|\omega^{(i+1)} - \omega^{(i)}\|^2 + \frac{34\beta^3 L_f^2}{\alpha^2 \mu^2} L_\omega^2 \sum_{i=0}^{K-1} \mathbb{E}\|G_\theta^{(i)}\|^2 \\
&\quad - \frac{8\beta L_f^2}{\alpha\mu} (\mathbb{E}\|\omega^{(K)} - \omega^*(\theta^{(K)})\|^2 - \mathbb{E}\|\omega^*(\theta^{(0)}) - \omega^{(0)}\|^2) \\
&\quad + \frac{34\beta L_f^2}{\mu^2} \left[ \frac{\beta^2 L_f^2}{|S|} q \sum_{i=0}^{K-1} \mathbb{E}\|G_\theta^{(i)}\|^2 + \frac{L_f^2}{|S|} q \sum_{i=0}^{K-1} \mathbb{E}\|\omega^{(i+1)} - \omega^{(i)}\|^2 \right]. \tag{56}
\end{aligned}$$

Plugging (56) into (52) yields that

$$\begin{aligned}
&\mathbb{E}J(\theta^{(K)}) - \mathbb{E}J(\theta^{(0)}) + \frac{8\beta L_f^2}{\alpha\mu} \left( \mathbb{E}\|\omega^{(K)} - \omega^*(\theta^{(K)})\|^2 - \mathbb{E}\|\omega^*(\theta^{(0)}) - \omega^{(0)}\|^2 \right) \\
&\leq \left( \frac{\beta^3 L_f^2}{|S|} q - \frac{1}{4} \beta \right) \sum_{i=0}^{K-1} \mathbb{E}\|G_\theta^{(i)}\|^2 + \frac{\beta L_f^2}{|S|} q \sum_{i=0}^{K-1} \mathbb{E}\|\omega^{(i+1)} - \omega^{(i)}\|^2 \\
&\quad - \frac{\beta}{2} \sum_{i=0}^K \mathbb{E}\|\nabla J(\theta^{(i)})\|^2 - L_f^2 \beta \sum_{i=0}^{K-1} \mathbb{E}\|\omega^*(\theta^{(i)}) - \omega^{(i)}\|^2 \\
&\quad - \frac{2\beta L_f^2}{\alpha\mu} \sum_{i=0}^{K-1} \mathbb{E}\|\omega^{(i+1)} - \omega^{(i)}\|^2 + \frac{34\beta^3 L_f^2}{\alpha^2 \mu^2} L_\omega^2 \sum_{i=0}^{K-1} \mathbb{E}\|G_\theta^{(i)}\|^2 \\
&\quad + \frac{34\beta L_f^2}{\mu^2} \left[ \frac{\beta^2 L_f^2}{|S|} q \sum_{i=0}^{K-1} \mathbb{E}\|G_\theta^{(i)}\|^2 + \frac{L_f^2}{|S|} q \sum_{i=0}^{K-1} \mathbb{E}\|\omega^{(i+1)} - \omega^{(i)}\|^2 \right].
\end{aligned}$$

(57)

Choose the following parameters:

$$\begin{aligned}\bar{C}_1 &\triangleq \mathbb{E}J(\boldsymbol{\theta}^{(0)}) - \mathbb{E}J(\boldsymbol{\theta}^{(K)}), \\ \bar{C}_2 &\triangleq (\mathbb{E}\|\boldsymbol{\omega}^*(\boldsymbol{\theta}^{(0)}) - \boldsymbol{\omega}^{(0)}\|^2 - \mathbb{E}\|\boldsymbol{\omega}^{(K)} - \boldsymbol{\omega}^*(\boldsymbol{\theta}^{(K)})\|^2).\end{aligned}\quad (58)$$

Next, multiplying both sides of (57) by  $\frac{2}{\beta}$ , and rearranging the terms, we obtain

$$\begin{aligned}& \sum_{i=0}^{K-1} \mathbb{E}\|\nabla J(\boldsymbol{\theta}^{(i)})\|^2 + 2L_f^2 \sum_{i=0}^{K-1} \mathbb{E}\|\boldsymbol{\omega}^*(\boldsymbol{\theta}^{(i)}) - \boldsymbol{\omega}^{(i)}\|^2 \\& - \frac{2}{\beta} \left( \frac{34L_f^4\beta^3}{\mu^2} \frac{1}{|S|} q + \frac{34L_f^2\beta^3}{\alpha^2\mu^2} L_\omega^2 + \frac{\beta^3 L_f^2}{|S|} q - \frac{1}{4}\beta \right) \sum_{i=0}^{K-1} \mathbb{E}\|G_{\boldsymbol{\theta}}^{(i)}\|^2 \\& - \frac{2}{\beta} \left( -\frac{2L_f^2\beta}{\mu\alpha} + \frac{34\beta}{\mu^2} \frac{L_f^4}{|S|} q + \frac{\beta L_f^2}{|S|} q \right) \sum_{i=0}^{K-1} \mathbb{E}\|\boldsymbol{\omega}^{(i+1)} - \boldsymbol{\omega}^{(i)}\|^2 \\& \leq \frac{16L_f^2}{\alpha\mu} \bar{C}_2 + \frac{2}{\beta} \bar{C}_1.\end{aligned}\quad (59)$$

We note that  $L_\omega = \frac{L_f}{\mu}$  from Lemma 2 . Based on the parameter settings, we have

$$\begin{aligned}q &= \sqrt{m}, S = \sqrt{m}, \alpha \leq \min\left\{\frac{1}{4L_f}, \frac{2\mu}{34L_f^2 + 2\mu^2}\right\}, \\ \beta &\leq \min\left\{\frac{1}{4L_f}, \frac{1}{2(L_f + \frac{L_f^2}{\mu})}, \frac{\mu}{8\sqrt{17}L_f^2}, \frac{\mu^2\alpha}{8\sqrt{34}L_f^2}\right\}.\end{aligned}\quad (60)$$

It follows that

$$\begin{aligned}& -\frac{2}{\beta} \left( \frac{34L_f^4\beta^3}{\mu^2} \frac{1}{|S|} q + \frac{34L_f^2\beta^3}{\alpha^2\mu^2} L_\omega^2 + \frac{\beta^3 L_f^2}{|S|} q - \frac{1}{4}\beta \right) \\& = \frac{1}{2} - \left( \frac{68L_f^4\beta^2}{\mu^2} + \frac{68L_f^2\beta^2}{\alpha^2\mu^2} L_\omega^2 + 2\beta^2 L_f^2 \right) \\& = \frac{1}{2} - \beta^2 \frac{68L_f^4}{\mu^2} - \frac{\beta^2 L_\omega^2}{\alpha^2\mu^2} (68L_f^2) - 2\beta^2 L_f^2 \\& \geq \frac{1}{2} - \frac{1}{16} - \frac{1}{32} - \frac{1}{8} > 0; \\& -\frac{2}{\beta} \left( -\frac{2L_f^2\beta}{\mu\alpha} + \frac{34\beta}{\mu^2} \frac{L_f^4}{|S|} q + \frac{\beta L_f^2}{|S|} q \right) = \frac{4L_f^2}{\mu\alpha} - \frac{68L_f^4}{\mu^2} - 2L_f^2 \\& = L_f^2 \left( \frac{4}{\mu\alpha} - 2 - \frac{68L_f^2}{\mu^2} \right) \geq 2L_f^2.\end{aligned}\quad (61)$$

In addition, we have

$$\begin{aligned}\mathbb{E}\|G_{\boldsymbol{\theta}}^{(\xi)}\|^2 &= \frac{1}{K} \sum_{i=0}^{K-1} \mathbb{E}\|G_{\boldsymbol{\theta}}^{(i)}\|^2, \\ \mathbb{E}\|\boldsymbol{\omega}^{(\xi+1)} - \boldsymbol{\omega}^{(\xi)}\|^2 &= \frac{1}{K} \sum_{i=0}^{K-1} \mathbb{E}\|\boldsymbol{\omega}^{(i+1)} - \boldsymbol{\omega}^{(i)}\|^2, \\ \mathbb{E}\|\nabla J(\boldsymbol{\theta}^{(\xi)})\|^2 &= \frac{1}{K} \sum_{i=0}^{K-1} \mathbb{E}\|\nabla J(\boldsymbol{\theta}^{(i)})\|^2,\end{aligned}\quad (62)$$



where  $\xi$  is selected uniformly at random from  $\{0, 1, \dots, K-1\}$ . By choosing  $q = \sqrt{m}$ ,  $S = \sqrt{m}$ , we have

$$\begin{aligned}
& \frac{1}{K} \left[ \sum_{i=0}^{K-1} \|\nabla J(\theta^{(i)})\|^2 - \frac{2}{\beta} \left( \frac{34L_f^4\beta^3}{\mu^2} \frac{1}{|S|} q + \frac{34L_f^2\beta^3}{\alpha^2\mu^2} L_\omega^2 + \frac{\beta^3 L_f^2}{|S|} q - \frac{1}{4}\beta \right) \sum_{i=0}^{K-1} \mathbb{E} \|G_\theta^{(i)}\|^2 \right. \\
& \quad \left. - \frac{2}{\beta} \left( -\frac{2L_f^2\beta}{\mu\alpha} + \frac{34\beta}{\mu^2} \frac{L_f^4}{|S|} q + \frac{\beta L_f^2}{|S|} q \right) \sum_{i=0}^{K-1} \mathbb{E} \|\omega^{(i+1)} - \omega^{(i)}\|^2 \right] \\
& \leq \frac{1}{K} \left[ \sum_{i=0}^{K-1} \|\nabla J(\theta^{(i)})\|^2 - \frac{2}{\beta} \left( -\frac{2L_f^2\beta}{\mu\alpha} + \frac{34\beta}{\mu^2} \frac{L_f^4}{|S|} q + \frac{\beta L_f^2}{|S|} q \right) \sum_{i=0}^{K-1} \mathbb{E} \|\omega^{(i+1)} - \omega^{(i)}\|^2 \right] \\
& \leq \frac{1}{K} \left[ \sum_{i=0}^{K-1} \|\nabla J(\theta^{(i)})\|^2 + 2L_f^2 \sum_{i=0}^{K-1} \mathbb{E} \|\omega^{(i+1)} - \omega^{(i)}\|^2 \right] \\
& \leq + \frac{16L_f^2}{\alpha\mu} \bar{C}_2 + \frac{2}{\beta} \bar{C}_1,
\end{aligned} \tag{63}$$

where (a) follows from (61). Since  $r_1 \geq 0$ ,  $r_2 \geq 0$ , we have

$$\mathbb{E} \left[ \|\nabla J(\theta^{(\xi)})\|^2 + 2L_f^2 \|\omega^{(\xi)} - \omega^*(\theta^{(\xi)})\|^2 \right] \leq \frac{1}{K} \left[ \frac{16L_f^2}{\alpha\mu} \bar{C}_2 + \frac{2}{\beta} \bar{C}_1 \right]. \tag{64}$$

Thus, we have

$$\frac{1}{K} \sum_{k=0}^{K-1} \mathbb{E} [\mathfrak{M}^{(k)}] \leq \frac{1}{K \min\{1, L_f^2\}} \left[ \frac{16L_f^2}{\alpha\mu} \bar{C}_2 + \frac{2}{\beta} \bar{C}_1 \right]. \tag{65}$$

We note that  $\bar{C}_1$  and  $\bar{C}_2$  cannot be negative. This is because  $C_1$  is always upper bounded by  $\mathbb{E}[J(\theta^{(0)})] - \mathbb{E}[J(\theta^*)]$  and  $J(\theta^{(k)}) \geq J(\theta^*)$ ,  $\forall k$ . Thus,  $\bar{C}_1$  is non-negative. Also, the term  $\mathbb{E} \|\omega^{(K)} - \omega^*(\theta^{(K)})\|^2$  in  $\bar{C}_2$  vanishes as the algorithm converges. Thus,  $C_2 \triangleq \mathbb{E} \|\omega^*(\theta^{(0)}) - \omega^{(0)}\|^2 - \mathbb{E} \|\omega^{(K)} - \omega^*(\theta^{(K)})\|^2 \rightarrow \mathbb{E} \|\omega^{(0)} - \omega^*(\theta^{(0)})\|^2$ , which implies  $\bar{C}_2$  to be non-negative.

Let's choose  $C_1 \triangleq \mathbb{E}[J(\theta^{(0)})] - \mathbb{E}[J(\theta^*)]$  and  $C_2 \triangleq (\mathbb{E} \|\omega^*(\theta^{(0)}) - \omega^{(0)}\|^2)$ , we have

$$\frac{1}{K} \sum_{k=0}^{K-1} \mathbb{E} [\mathfrak{M}^{(k)}] \leq \frac{1}{K \min\{1, L_f^2\}} \left[ \frac{16L_f^2}{\alpha\mu} C_2 + \frac{2}{\beta} C_1 \right] = \mathcal{O}\left(\frac{1}{K}\right).$$

Lastly, to show the sample complexity, the number of amplies in the outer loops can be calculated as:  $\lceil \frac{K}{q} \rceil \cdot M$ . Also, the number of samples in the inner loop can be calculated as  $KS$ . Hence, the total sample complexity can be calculated as:  $\lceil \frac{K}{q} \rceil M + K \cdot S \leq \frac{K+q}{q} M + K\sqrt{M} = K\sqrt{M} + M + K\sqrt{M} = \mathcal{O}(\sqrt{M}\epsilon^{-1} + M)$ . Thus, the overall sample complexity is  $\mathcal{O}(\sqrt{M}\epsilon^{-1} + M)$ . This completes the proof.  $\square$

## 11 PROOF OF THEOREM 3

*Proof.* By taking expectation on both sides of Lemma 5 with respect to the randomness of the algorithm, we have

$$\begin{aligned}
& \mathbb{E}[J(\theta^{(k+1)}) - J(\theta^{(k)})] \\
& \leq -\frac{\beta}{2} \|\nabla J(\theta^{(k)})\|^2 - \frac{\beta}{4} \|G_\theta^{(k)}\|^2 + L_f^2 \beta \|\omega^*(\theta^{(k)}) - \omega^{(k)}\|^2 + \beta \|\nabla_\theta \mathcal{L}(\theta^{(k)}, \omega^{(k)}) - G_\theta^{(k)}\|^2 \\
& \stackrel{(a)}{\leq} \beta \left[ \frac{I_{\mathcal{N}_s \leq M}}{\mathcal{N}_s} \sigma^2 + \frac{L_f^2}{|S|} \sum_{i=(n_k-1)q}^{k-1} \mathbb{E} \|\theta^{(i+1)} - \theta^{(i)}\|^2 + \frac{L_f^2}{|S|} \sum_{i=(n_k-1)q}^{k-1} \mathbb{E} \|\omega^{(i+1)} - \omega^{(i)}\|^2 \right]
\end{aligned}$$

$$- \frac{\beta}{2} \|\nabla J(\boldsymbol{\theta}^{(k)})\|^2 - \frac{\beta}{4} \|G_{\boldsymbol{\theta}}^{(k)}\|^2 + L_f^2 \beta \|\boldsymbol{\omega}^*(\boldsymbol{\theta}^{(k)}) - \boldsymbol{\omega}^{(k)}\|^2, \quad (66)$$

where (a) follows from Lemma 8.

Recall that  $\mathcal{N}_s = \min\{c_\gamma \sigma^2(\gamma^{(k)})^{-1}, c_\epsilon \sigma^2 \epsilon^{-1}, M\}$ . Then we have

$$\begin{aligned} \frac{I_{(\mathcal{N}_s < M)}}{\mathcal{N}_s} &\leq \frac{1}{\min\{c_\epsilon \sigma^2(\epsilon)^{-1}, c_\gamma \sigma^2(\gamma^{(k)})^{-1}\}} \\ &= \max\left\{\frac{\gamma^{(k)}}{c_\gamma \sigma^2}, \frac{\epsilon}{c_\epsilon \sigma^2}\right\} \leq \frac{\gamma^{(k)}}{c_\gamma \sigma^2} + \frac{\epsilon}{c_\epsilon \sigma^2}. \end{aligned} \quad (67)$$

Next, telescoping (66) over  $k$  from  $(n_k - 1)q + 1$  to  $k$ , where  $k \leq n_k q - 1$ , we obtain that

$$\begin{aligned} &\mathbb{E}[J(\boldsymbol{\theta}^{(k+1)}) - J(\boldsymbol{\theta}^{(n_k-1)q})] \\ &\stackrel{(a)}{\leq} \beta \left[ \frac{\beta^2 L_f^2}{|S|} \sum_{j=(n_k-1)q}^k \sum_{i=(n_k-1)q}^{j-1} \mathbb{E}\|G_{\boldsymbol{\theta}}^{(i)}\|^2 + \frac{L_f^2}{|S|} \sum_{j=(n_k-1)q}^k \sum_{i=(n_k-1)q}^{j-1} \mathbb{E}\|\boldsymbol{\omega}^{(i+1)} - \boldsymbol{\omega}^{(i)}\|^2 \right] \\ &\quad + \beta \sum_{i=(n_k-1)q}^k \frac{I_{(\mathcal{N}_s < M)}}{\mathcal{N}_s} \sigma^2 + L_f^2 \beta \sum_{i=(n_k-1)q}^k \mathbb{E}\|\boldsymbol{\omega}^{(i)} - \boldsymbol{\omega}^*(\boldsymbol{\theta}^{(i)})\|^2 \\ &\quad - \frac{\beta}{2} \sum_{i=(n_k-1)q}^k \|\nabla J(\boldsymbol{\theta}^{(i)})\|^2 - \frac{1}{4} \beta \sum_{i=(n_k-1)q}^k \mathbb{E}\|G_{\boldsymbol{\theta}}^{(i)}\|^2 \\ &\stackrel{(b)}{\leq} \beta \left[ \frac{\beta^2 L_f^2}{|S|} \sum_{j=(n_k-1)q}^k \sum_{i=(n_k-1)q}^k \mathbb{E}\|G_{\boldsymbol{\theta}}^{(i)}\|^2 + \frac{L_f^2}{|S|} \sum_{j=(n_k-1)q}^k \sum_{i=(n_k-1)q}^k \mathbb{E}\|\boldsymbol{\omega}^{(i+1)} - \boldsymbol{\omega}^{(i)}\|^2 \right] \\ &\quad + \beta \sum_{i=(n_k-1)q}^k \left( \frac{\mathbb{E}[\gamma^{(i)}]}{c_\gamma} + \frac{\epsilon}{c_\epsilon} \right) + L_f^2 \beta \sum_{i=(n_k-1)q}^k \mathbb{E}\|\boldsymbol{\omega}^{(i)} - \boldsymbol{\omega}^*(\boldsymbol{\theta}^{(i)})\|^2 \\ &\quad - \frac{\beta}{2} \sum_{i=(n_k-1)q}^k \|\nabla J(\boldsymbol{\theta}^{(i)})\|^2 - \frac{1}{4} \beta \sum_{i=(n_k-1)q}^k \mathbb{E}\|G_{\boldsymbol{\theta}}^{(i)}\|^2 \\ &= \beta \left[ \frac{\beta^2 L_f^2}{|S|} q \sum_{i=(n_k-1)q}^k \mathbb{E}\|G_{\boldsymbol{\theta}}^{(i)}\|^2 + \frac{L_f^2}{|S|} q \sum_{i=(n_k-1)q}^k \mathbb{E}\|\boldsymbol{\omega}^{(i+1)} - \boldsymbol{\omega}^{(i)}\|^2 \right] \\ &\quad + \beta \sum_{i=(n_k-1)q}^k \frac{\mathbb{E}[\gamma^{(i)}]}{c_\gamma} + \beta \sum_{i=(n_k-1)q}^k \frac{\epsilon}{c_\epsilon} + L_f^2 \beta \sum_{i=(n_k-1)q}^k \mathbb{E}\|\boldsymbol{\omega}^{(i)} - \boldsymbol{\omega}^*(\boldsymbol{\theta}^{(i)})\|^2 \\ &\quad - \frac{\beta}{2} \sum_{i=(n_k-1)q}^k \|\nabla J(\boldsymbol{\theta}^{(i)})\|^2 - \frac{1}{4} \beta \sum_{i=(n_k-1)q}^k \mathbb{E}\|G_{\boldsymbol{\theta}}^{(i)}\|^2, \end{aligned} \quad (68)$$

where (a) follows from (66), and (b) follows from (67). We continue the proof by further deriving

$$\begin{aligned} &\mathbb{E}J(\boldsymbol{\theta}^{(K)}) - \mathbb{E}J(\boldsymbol{\theta}^{(0)}) \\ &= \mathbb{E}J(\boldsymbol{\theta}^{(q)}) - \mathbb{E}J(\boldsymbol{\theta}^{(0)}) + \mathbb{E}J(\boldsymbol{\theta}^{(2q)}) - \mathbb{E}J(\boldsymbol{\theta}^{(q)}) + \dots + \mathbb{E}J(\boldsymbol{\theta}^{(K)}) - \mathbb{E}J(\boldsymbol{\theta}^{((n_K-1)q)}) \\ &\stackrel{(a)}{\leq} \beta \left[ \frac{\beta^2 L_f^2}{|S|} q \sum_{i=0}^{K-1} \mathbb{E}\|G_{\boldsymbol{\theta}}^{(i)}\|^2 + \frac{L_f^2}{|S|} q \sum_{i=0}^{K-1} \mathbb{E}\|\boldsymbol{\omega}^{(i+1)} - \boldsymbol{\omega}^{(i)}\|^2 + \sum_{i=0}^{K-1} \frac{\mathbb{E}[\gamma^{(i)}]}{c_\gamma} \right] \\ &\quad + \beta K \frac{\epsilon}{c_\epsilon} + L_f^2 \beta \sum_{i=0}^{K-1} \mathbb{E}\|\boldsymbol{\omega}^{(i)} - \boldsymbol{\omega}^*(\boldsymbol{\theta}^{(i)})\|^2 - \frac{\beta}{2} \sum_{i=0}^{K-1} \|\nabla J(\boldsymbol{\theta}^{(i)})\|^2 - \frac{1}{4} \beta \sum_{i=0}^{K-1} \mathbb{E}\|G_{\boldsymbol{\theta}}^{(i)}\|^2, \end{aligned} \quad (69)$$

where (a) follows from (67).

From Lemma 7, by taking expectation with respect to the randomness of the algorithm, we have

$$\begin{aligned}
\mathbb{E}\|\omega^{(k+1)} - \omega^*(\theta^{(k+1)})\|^2 &\leq -\frac{1}{4}\mathbb{E}\|\omega^{(k+1)} - \omega^{(k)}\|^2 + \frac{17}{4\alpha\mu}L_\omega^2\mathbb{E}\|\theta^{k+1} - \theta^k\|^2 \\
&\quad + \frac{17\alpha}{4\mu}\mathbb{E}\|\nabla\omega\mathcal{L}(\theta^{(k)}, \omega^{(k)}) - G_\omega^{(k)}\|^2 + (1 - \frac{\alpha\mu}{4})\mathbb{E}\|\omega^*(\theta^{(k)}) - \omega^{(k)}\|^2 \\
&\stackrel{(a)}{\leq} -\frac{1}{4}\mathbb{E}\|\omega^{(k+1)} - \omega^{(k)}\|^2 + \frac{17\beta^2}{4\alpha\mu}L_\omega^2\mathbb{E}\|G_\theta^k\|^2 + (1 - \frac{\alpha\mu}{4})\mathbb{E}\|\omega^*(\theta^{(k)}) - \omega^{(k)}\|^2 \\
&\quad + \frac{17\alpha}{4\mu}\left[\frac{I_{(\mathcal{N}_s < M)}}{\mathcal{N}_s}\sigma^2 + \frac{L_f^2}{|S|}\sum_{i=(n_k-1)q}^{k-1}\mathbb{E}\|\theta^{(i+1)} - \theta^{(i)}\|^2 + \frac{L_f^2}{|S|}\sum_{i=(n_k-1)q}^{k-1}\mathbb{E}\|\omega^{(i+1)} - \omega^{(i)}\|^2\right] \\
&\stackrel{(b)}{\leq} -\frac{1}{4}\mathbb{E}\|\omega^{(k+1)} - \omega^{(k)}\|^2 + \frac{17\beta^2}{4\alpha\mu}L_\omega^2\mathbb{E}\|G_\theta^k\|^2 + (1 - \frac{\alpha\mu}{4})\mathbb{E}\|\omega^*(\theta^{(k)}) - \omega^{(k)}\|^2 \\
&\quad + \frac{17\alpha}{4\mu}\left[\max\left\{\frac{\mathbb{E}[\gamma^{(i)}]}{c_\gamma}, \frac{\epsilon}{c_\epsilon}\right\} + \frac{L_f^2}{|S|}\beta^2\sum_{i=(n_k-1)q}^{k-1}\mathbb{E}\|G_\theta^{(i)}\|^2 + \frac{L_f^2}{|S|}\sum_{i=(n_k-1)q}^{k-1}\mathbb{E}\|\omega^{(i+1)} - \omega^{(i)}\|^2\right],
\end{aligned} \tag{70}$$

where (a) follows from Lemma 8 and (b) follows from (67). Next, summing both sides of (70) from  $i = k$  to  $i = (n_k - 1)q$  yields:

$$\begin{aligned}
&\mathbb{E}\|\omega^{(k+1)} - \omega^*(\theta^{(k+1)})\|^2 - \mathbb{E}\|\omega^*(\theta^{(n_k-1)q}) - \omega^{(n_k-1)q}\|^2 \\
&\stackrel{(a)}{\leq} -\frac{1}{4}\sum_{i=(n_k-1)q}^k\mathbb{E}\|\omega^{(i+1)} - \omega^{(i)}\|^2 + \frac{17\beta^2}{4\alpha\mu}L_\omega^2\sum_{i=(n_k-1)q}^k\mathbb{E}\|G_\theta^{(i)}\|^2 \\
&\quad - \frac{\alpha\mu}{4}\sum_{i=(n_k-1)q}^k\mathbb{E}\|\omega^*(\theta^{(i)}) - \omega^{(i)}\|^2 + \frac{17\alpha}{4\mu}\sum_{i=(n_k-1)q}^k\max\left\{\frac{\mathbb{E}[\gamma^{(i)}]}{c_\gamma}, \frac{\epsilon}{c_\epsilon}\right\} \\
&\quad + \frac{17\alpha}{4\mu}\left[\frac{\beta^2}{|S|}L_f^2\sum_{j=(n_k-1)q}^k\sum_{i=(n_k-1)q}^{j-1}\mathbb{E}\|G_\theta^{(i)}\|^2 + \frac{L_f^2}{|S|}\sum_{j=(n_k-1)q}^k\sum_{i=(n_k-1)q}^{j-1}\mathbb{E}\|\omega^{(i+1)} - \omega^{(i)}\|^2\right] \\
&\stackrel{(b)}{\leq} -\frac{1}{4}\sum_{i=(n_k-1)q}^k\mathbb{E}\|\omega^{(i+1)} - \omega^{(i)}\|^2 + \frac{17\beta^2}{4\alpha\mu}L_\omega^2\sum_{i=(n_k-1)q}^k\mathbb{E}\|G_\theta^{(i)}\|^2 \\
&\quad - \frac{\alpha\mu}{4}\sum_{i=(n_k-1)q}^k\mathbb{E}\|\omega^*(\theta^{(i)}) - \omega^{(i)}\|^2 + \frac{17\alpha}{4\mu}\sum_{i=(n_k-1)q}^k\frac{\mathbb{E}[\gamma^{(i)}]}{c_\gamma} + \frac{17\alpha}{4\mu}\sum_{i=(n_k-1)q}^k\frac{\epsilon}{c_\epsilon} \\
&\quad + \frac{17\alpha}{4\mu}\left[\frac{\beta^2}{|S|}L_f^2\sum_{j=(n_k-1)q}^k\sum_{i=(n_k-1)q}^k\mathbb{E}\|G_\theta^{(i)}\|^2 + \frac{L_f^2}{|S|}\sum_{j=(n_k-1)q}^k\sum_{i=(n_k-1)q}^k\mathbb{E}\|\omega^{(i+1)} - \omega^{(i)}\|^2\right] \\
&\stackrel{(c)}{\leq} -\frac{1}{4}\sum_{i=(n_k-1)q}^k\mathbb{E}\|\omega^{(i+1)} - \omega^{(i)}\|^2 + \frac{17\beta^2}{4\alpha\mu}L_\omega^2\sum_{i=(n_k-1)q}^k\mathbb{E}\|G_\theta^{(i)}\|^2 \\
&\quad - \frac{\alpha\mu}{4}\sum_{i=(n_k-1)q}^k\mathbb{E}\|\omega^*(\theta^{(i)}) - \omega^{(i)}\|^2 + \frac{17\alpha}{4\mu}\sum_{i=(n_k-1)q}^k\frac{\epsilon}{c} + \frac{17\alpha}{4\mu}\sum_{i=(n_k-1)q}^k\frac{\mathbb{E}[\gamma^{(i)}]}{c_\gamma} \\
&\quad + \frac{17\alpha}{4\mu}\left[\frac{\beta^2}{|S|}L_f^2\sum_{j=(n_k-1)q}^k\sum_{i=(n_k-1)q}^k\mathbb{E}\|G_\theta^{(i)}\|^2 + \frac{L_f^2}{|S|}\sum_{j=(n_k-1)q}^k\sum_{i=(n_k-1)q}^k\mathbb{E}\|\omega^{(i+1)} - \omega^{(i)}\|^2\right],
\end{aligned} \tag{71}$$

where (a) follows from the fact that  $\beta \leq \frac{\mu}{L_f^2}$ . (b) follows from extending the summation of the second term from  $j - 1$  to  $k$ , and (c) follows from the fact that  $k \leq n_k q - 1$ . We continue the proof by further driving

$$\mathbb{E}\|\omega^{(K)} - \omega^*(\theta^{(K)})\|^2 - \mathbb{E}\|\omega^*(\theta^{(0)}) - \omega^{(0)}\|^2$$

$$\begin{aligned}
&= \mathbb{E} \|\omega^{(q)} - \omega^*(\theta^{(q)})\|^2 - \mathbb{E} \|\omega^*(\theta^{(0)}) - \omega^{(0)}\|^2 + \mathbb{E} \|\omega^{(2q)} - \omega^*(\theta^{(2q)})\|^2 \\
&\quad - \mathbb{E} \|\omega^*(\theta^{(q)}) - \omega^{(q)}\|^2 + \dots + \mathbb{E} \|\omega^{(K)} - \omega^*(\theta^{(K)})\|^2 - \mathbb{E} \|\omega^*(\theta^{(n_K-1)q}) - \omega^*(\theta^{(n_K-1)q})\|^2 \\
&\leq -\frac{1}{4} \sum_{i=0}^{K-1} \mathbb{E} \|\omega^{(i+1)} - \omega^{(i)}\|^2 + \frac{17\beta^2}{4\alpha\mu} L_\omega^2 \sum_{i=0}^{K-1} \mathbb{E} \|G_\theta^{(i)}\|^2 - \frac{\alpha\mu}{4} \sum_{i=0}^{K-1} \mathbb{E} \|\omega^*(\theta^{(i)}) - \omega^{(i)}\|^2 \\
&\quad + \frac{17\alpha}{4\mu} \sum_{i=0}^{K-1} \frac{\epsilon}{c} + \frac{17\alpha}{4\mu} \sum_{i=0}^{K-1} \frac{\mathbb{E}[\gamma^{(i)}]}{c_\gamma} + \frac{17\alpha}{4\mu} \left[ \frac{\beta^2}{|S|} L_f^2 q \sum_{i=0}^{K-1} \mathbb{E} \|G_\theta^{(i)}\|^2 + \frac{L_f^2}{|S|} q \sum_{i=0}^{K-1} \mathbb{E} \|\omega^{(i+1)} - \omega^{(i)}\|^2 \right]. \tag{72}
\end{aligned}$$

By rearranging the terms, we have

$$\begin{aligned}
&\frac{\alpha\mu}{4} \sum_{i=0}^{K-1} \mathbb{E} \|\omega^*(\theta^{(i)}) - \omega^{(i)}\|^2 \\
&\leq \left( -\frac{1}{4} + \frac{17\alpha}{4\mu} \frac{L_f^2}{|S|} q \right) \sum_{i=0}^{K-1} \mathbb{E} \|\omega^{(i+1)} - \omega^{(i)}\|^2 + \left( \frac{17\alpha}{4\mu} \frac{\beta^2}{|S|} L_f^2 q + \frac{17\beta^2}{4\alpha\mu} L_\omega^2 \right) \sum_{i=0}^{K-1} \mathbb{E} \|G_\theta^{(i)}\|^2 \\
&\quad + \frac{17\alpha}{4\mu} \sum_{i=0}^{K-1} \frac{\mathbb{E}[\gamma^{(i)}]}{c_\gamma} + \frac{17\alpha}{4\mu} \sum_{i=0}^{K-1} \frac{\epsilon}{c} + \mathbb{E} \|\omega^*(\theta^{(0)}) - \omega^{(0)}\|^2 - \mathbb{E} \|\omega^{(K)} - \omega^*(\theta^{(K)})\|^2. \tag{73}
\end{aligned}$$

Next, multiplying both sides of (72) by  $\frac{8\beta L_f^2}{\alpha\mu}$ , and rearranging the terms, we obtain

$$\begin{aligned}
&\frac{8\beta L_f^2}{\alpha\mu} (\mathbb{E} \|\omega^{(K)} - \omega^*(\theta^{(K)})\|^2 - \mathbb{E} \|\omega^*(\theta^{(0)}) - \omega^{(0)}\|^2) \\
&\leq \left( -\frac{2\beta L_f^2}{\mu\alpha} + \frac{17\beta L_f^2}{\mu^2} \frac{2\beta^2 L_f^2}{|S|} q \right) \sum_{i=0}^{K-1} \mathbb{E} \|\omega^{(i+1)} - \omega^{(i)}\|^2 + \frac{34\beta L_f^2}{\mu^2} \sum_{i=0}^{K-1} \frac{\epsilon}{c} + \frac{34\beta L_f^2}{\mu^2} \sum_{i=0}^{K-1} \frac{\gamma^{(i)}}{c_\gamma} \\
&\quad + 2\beta L_f^2 \left( \frac{17}{\mu^2} \frac{\beta^2 L_f^2}{|S|} q + \frac{17\beta^2}{\alpha^2 \mu^2} L_\omega^2 \right) \sum_{i=0}^{K-1} \mathbb{E} \|G_\theta^{(i)}\|^2 - 2\beta L_f^2 \sum_{i=0}^{K-1} \mathbb{E} \|\omega^*(\theta^{(i)}) - \omega^{(i)}\|^2. \tag{74}
\end{aligned}$$

Plugging (74) into (69) yields that

$$\begin{aligned}
&\mathbb{E} J(\theta^{(K)}) - \mathbb{E} J(\theta^{(0)}) + \frac{8\beta L_f^2}{\alpha\mu} (\mathbb{E} \|\omega^{(K)} - \omega^*(\theta^{(K)})\|^2 - \mathbb{E} \|\omega^*(\theta^{(0)}) - \omega^{(0)}\|^2) \\
&\leq \beta \left[ \frac{\beta^2 L_f^2}{|S|} q \sum_{i=0}^{K-1} \mathbb{E} \|G_\theta^{(i)}\|^2 + \frac{L_f^2}{|S|} q \sum_{i=0}^{K-1} \mathbb{E} \|\omega^{(i+1)} - \omega^{(i)}\|^2 \right] - \frac{\beta}{2} \sum_{i=0}^{K-1} \|\nabla J(\theta^{(i)})\|^2 \\
&\quad - \frac{1}{4} \beta \sum_{i=0}^{K-1} \mathbb{E} \|G_\theta^{(i)}\|^2 + 2L_f^2 \beta \left( -\frac{1}{\mu\alpha} + \frac{17}{\mu^2} \frac{\beta^2 L_f^2}{|S|} q \right) \sum_{i=0}^{K-1} \mathbb{E} \|\omega^{(i+1)} - \omega^{(i)}\|^2 \\
&\quad + 2L_f^2 \beta \left( \frac{17}{\mu^2} \frac{\beta^2 L_f^2}{|S|} q + \frac{17\beta^2}{\alpha^2 \mu^2} L_\omega^2 \right) \sum_{i=0}^{K-1} \mathbb{E} \|G_\theta^{(i)}\|^2 - \beta L_f^2 \sum_{i=0}^{K-1} \mathbb{E} \|\omega^*(\theta^{(i)}) - \omega^{(i)}\|^2 \\
&\quad + \beta K \frac{\epsilon}{c_\epsilon} + \frac{17}{\mu^2} \sum_{i=0}^{K-1} \frac{\epsilon}{c_\epsilon} + \frac{34\beta L_f^2}{\mu^2} \sum_{i=0}^{K-1} \frac{\gamma^{(i)}}{c_\gamma} + \beta \sum_{i=0}^{K-1} \frac{\gamma^{(i)}}{c_\gamma} \\
&= \left( -\frac{2L_f^2 \beta}{\mu\alpha} + \frac{34L_f^4 \beta^3}{\mu^2 |S|} q + \frac{L_f^2}{|S|} \beta q \right) \sum_{i=0}^{K-1} \mathbb{E} \|\omega^{(i+1)} - \omega^{(i)}\|^2 - \frac{\beta}{2} \sum_{i=0}^{K-1} \|\nabla J(\theta^{(i)})\|^2 \\
&\quad - \beta L_f^2 \sum_{i=0}^{K-1} \mathbb{E} \|\omega^*(\theta^{(i)}) - \omega^{(i)}\|^2 + \left( \frac{34L_f^4 \beta^3}{\mu^2 |S|} q + \frac{34L_f^2 \beta^3}{\alpha^2 \mu^2} L_\omega^2 + \frac{\beta^3 L_f^2}{|S|} q - \frac{1}{4} \beta \right) \sum_{i=0}^{K-1} \mathbb{E} \|G_\theta^{(i)}\|^2 \\
&\quad + \beta K \frac{\epsilon}{c_\epsilon} + \frac{17}{\mu^2} \sum_{i=0}^{K-1} \frac{\epsilon}{c_\epsilon} + \frac{34\beta L_f^2}{\mu^2} \sum_{i=0}^{K-1} \frac{\gamma^{(i)}}{c_\gamma} + \beta \sum_{i=0}^{K-1} \frac{\gamma^{(i)}}{c_\gamma}. \tag{75}
\end{aligned}$$

Recall that  $\gamma^{(k)} = \frac{1}{q} \sum_{i=(n_k-1)q}^k \|G_{\theta}^{(i)}\|^2$ . Then, we have

$$\begin{aligned}
& \mathbb{E}J(\theta^{(K)}) - \mathbb{E}J(\theta^{(0)}) + \frac{8\beta L_f^2}{\alpha\mu} (\mathbb{E}\|\omega^{(K)} - \omega^*(\theta^{(K)})\|^2 - \mathbb{E}\|\omega^*(\theta^{(0)}) - \omega^{(0)}\|^2) \\
& \leq \left( -\frac{2L_f^2\beta}{\mu\alpha} + \frac{34L_f^4\beta^3}{\mu^2|S|}q + \frac{L_f^2}{|S|}\beta q \right) \sum_{i=0}^{K-1} \mathbb{E}\|\omega^{(i+1)} - \omega^{(i)}\|^2 - \frac{\beta}{2} \sum_{i=0}^{K-1} \|\nabla J(\theta^{(i)})\|^2 \\
& \quad - \beta L_f^2 \sum_{i=0}^{K-1} \mathbb{E}\|\omega^*(\theta^{(i)}) - \omega^{(i)}\|^2 + \left( \frac{34L_f^4\beta^3}{\mu^2|S|}q + \frac{34L_f^2\beta^3}{\alpha^2\mu^2}L_\omega^2 + \frac{\beta^3 L_f^2}{|S|}q - \frac{1}{4}\beta + \frac{34\beta L_f^2}{\mu^2 c_\gamma} \right. \\
& \quad \left. + \frac{\beta}{c_\gamma} \right) \sum_{i=0}^{K-1} \mathbb{E}\|G_{\theta}^{(i)}\|^2 + \beta K \frac{\epsilon}{c_\epsilon} + \frac{17}{\mu^2} K \frac{\epsilon}{c_\epsilon}.
\end{aligned} \tag{76}$$

Choose the following parameters:

$$\begin{aligned}
\bar{C}_1 & \triangleq \mathbb{E}J(\theta^{(0)}) - \mathbb{E}J(\theta^{(K)}), \\
\bar{C}_2 & \triangleq (\mathbb{E}\|\omega^*(\theta^{(0)}) - \omega^{(0)}\|^2 - \mathbb{E}\|\omega^{(K)} - \omega^*(\theta^{(K)})\|^2).
\end{aligned} \tag{77}$$

Next, multiplying both sides of (75) by  $\frac{2}{\beta}$  and rearranging terms, we obtain

$$\begin{aligned}
& -\frac{2}{\beta} \left( \frac{34L_f^4\beta^3}{\mu^2|S|}q + \frac{34L_f^2\beta^3}{\alpha^2\mu^2}L_\omega^2 + \frac{\beta^3 L_f^2}{|S|}q - \frac{1}{4}\beta + \frac{34\beta L_f^2}{\mu^2 c_\gamma} + \frac{\beta}{c_\gamma} \right) \sum_{i=0}^{K-1} \mathbb{E}\|G_{\theta}^{(i)}\|^2 \\
& + \sum_{i=0}^{K-1} \|\nabla J(\theta^{(i)})\|^2 - \frac{2}{\beta} \left( -\frac{2L_f^2\beta}{\mu\alpha} + \frac{34L_f^4\beta^3}{\mu^2|S|}q + \frac{L_f^2}{|S|}\beta q \right) \sum_{i=0}^{K-1} \mathbb{E}\|\omega^{(i+1)} - \omega^{(i)}\|^2 \\
& + 2L_f^2 \sum_{i=0}^{K-1} \mathbb{E}\|\omega^*(\theta^{(i)}) - \omega^{(i)}\|^2 \\
& \leq 2K \frac{\epsilon}{c} + \frac{34}{\beta\mu^2} K \frac{\epsilon}{c} + \frac{16L_f^2}{\alpha\mu} \bar{C}_2 + \frac{2}{\beta} \bar{C}_1.
\end{aligned} \tag{78}$$

Note that  $L_\omega = \frac{L_f}{\mu}$  from Lemma 2. Based on the parameter settings, we have

$$\begin{aligned}
q & = \sqrt{m}, S = \sqrt{m}, c_\gamma \geq \left( \frac{288L_f^2}{\mu^2} + 8 \right), \alpha \leq \min \left\{ \frac{1}{4L_f}, \frac{2\mu}{34L_f^2 + 2\mu^2} \right\}, \\
\beta & \leq \min \left\{ \frac{1}{4L_f}, \frac{1}{2(L_f + \frac{L_f^2}{\mu})}, \frac{\mu}{8\sqrt{17}L_f^2}, \frac{\mu^2\alpha}{8\sqrt{34}L_f^2} \right\}.
\end{aligned} \tag{79}$$

Similar to (61), we have

$$\begin{aligned}
& -\frac{2}{\beta} \left( \frac{34L_f^4\beta^3}{\mu^2|S|}q + \frac{34L_f^2\beta^3}{\alpha^2\mu^2}L_\omega^2 + \frac{\beta^3 L_f^2}{|S|}q - \frac{1}{4}\beta + \frac{34\beta L_f^2}{\mu^2 c_\gamma} + \frac{\beta}{c_\gamma} \right) \\
& = \frac{1}{2} - \left( \frac{68L_f^4\beta^2}{\mu^2} + \frac{68L_f^2\beta^2}{\alpha^2\mu^2}L_\omega^2 + 2\beta^2 L_f^2 \right) - \left( \frac{68L_f^2}{\mu^2 c_\gamma} + \frac{2}{c_\gamma} \right) \\
& = \frac{1}{2} - \beta^2 \frac{68L_f^4}{\mu^2} - \frac{\beta^2 L_\omega^2}{\alpha^2\mu^2} (68L_f^2) - 2\beta^2 L_f^2 - \left( \frac{68L_f^2}{\mu^2 c_\gamma} + \frac{2}{c_\gamma} \right) \\
& \geq \frac{1}{2} - \frac{1}{16} - \frac{1}{32} - \frac{1}{8} - \frac{1}{4} > 0; \\
& \quad -\frac{2}{\beta} \left( -\frac{2L_f^2\beta}{\mu\alpha} + \frac{34L_f^4\beta^3}{\mu^2|S|}q + \frac{L_f^2}{|S|}\beta q \right) \\
& = \frac{4L_f^2}{\mu\alpha} - \frac{68L_f^4}{\mu^2} - 2L_f^2 = L_f^2 \left( \frac{4}{\mu\alpha} - 2 - \frac{68L_f^2}{\mu^2} \right) \geq 2L_f^2.
\end{aligned} \tag{80}$$

It then follows that:

$$\sum_{i=0}^{K-1} \|\nabla J(\boldsymbol{\theta}^{(i)})\|^2 + 2L_f^2 \sum_{i=0}^{K-1} \mathbb{E} \|\boldsymbol{\omega}^*(\boldsymbol{\theta}^{(i)}) - \boldsymbol{\omega}^{(i)}\|^2 \leq 2K \frac{\epsilon}{c} + \frac{34}{\beta \mu^2} K \frac{\epsilon}{c} + \frac{16L_f^2}{\alpha \mu} \bar{C}_2 + \frac{2}{\beta} \bar{C}_1. \quad (81)$$

Thus, we have

$$\frac{1}{K} \sum_{k=0}^{K-1} \mathbb{E}[\mathfrak{M}^{(k)}] \leq \frac{1}{K \min\{1, L_f^2\}} \left[ 2K \frac{\epsilon}{c} + \frac{34}{\beta \mu^2} K \frac{\epsilon}{c} + \frac{16L_f^2}{\alpha \mu} \bar{C}_2 + \frac{2}{\beta} \bar{C}_1 \right]. \quad (82)$$

We note that  $\bar{C}_1$  and  $\bar{C}_2$  cannot be negative. This is because  $C_1$  is always upper bounded by  $\mathbb{E}[J(\boldsymbol{\theta}^{(0)})] - \mathbb{E}[J(\boldsymbol{\theta}^*)]$  and  $J(\boldsymbol{\theta}^{(k)}) \geq J(\boldsymbol{\theta}^*)$ ,  $\forall k$ . Thus,  $\bar{C}_1$  is non-negative. Also, the term  $\mathbb{E} \|\boldsymbol{\omega}^{(K)} - \boldsymbol{\omega}^*(\boldsymbol{\theta}^{(K)})\|^2$  in  $\bar{C}_2$  vanishes as the algorithm converges. Thus,  $\bar{C}_2 \triangleq \mathbb{E} \|\boldsymbol{\omega}^*(\boldsymbol{\theta}^{(0)}) - \boldsymbol{\omega}^{(0)}\|^2 - \mathbb{E} \|\boldsymbol{\omega}^{(K)} - \boldsymbol{\omega}^*(\boldsymbol{\theta}^{(K)})\|^2 \rightarrow \mathbb{E} \|\boldsymbol{\omega}^{(0)} - \boldsymbol{\omega}^*(\boldsymbol{\theta}^{(0)})\|^2$ , which implies  $\bar{C}_2$  is non-negative.

Let's choose  $C_1 \triangleq \mathbb{E}[J(\boldsymbol{\theta}^{(0)})] - \mathbb{E}[J(\boldsymbol{\theta}^*)]$  and  $C_2 \triangleq (\mathbb{E} \|\boldsymbol{\omega}^*(\boldsymbol{\theta}^{(0)}) - \boldsymbol{\omega}^{(0)}\|^2)$ , we have

$$\frac{1}{K} \sum_{k=0}^{K-1} \mathbb{E}[\mathfrak{M}^{(k)}] \leq \frac{1}{K \min\{1, L_f^2\}} \left[ 2K \frac{\epsilon}{c} + \frac{34}{\beta \mu^2} K \frac{\epsilon}{c} + \frac{16L_f^2}{\alpha \mu} C_2 + \frac{2}{\beta} C_1 \right] = \mathcal{O}\left(\frac{1}{K}\right).$$

Similar to Theroem 1, to show the sample complexity, we note that the number of samples being used in the outer loops can be calculated as:  $\lceil \frac{K}{q} \rceil \cdot \mathcal{N}_s \leq \lceil \frac{K}{q} \rceil \cdot M$ . Also, the number of samples in the inner loop can be calculated as  $KS$ . Hence, the total sample complexity can be calculated as:

$$\lceil \frac{K}{q} \rceil M + K \cdot S \leq \frac{K+q}{q} M + K\sqrt{M} = K\sqrt{M} + M + K\sqrt{M} = \mathcal{O}(\sqrt{M}\epsilon^{-1} + M).$$

Thus, the overall sample complexity is  $\mathcal{O}(\sqrt{M}\epsilon^{-1} + M)$ . This completes the proof.  $\square$

## 12 ADDITIONAL ANALYSIS ON $\theta \in \Theta$

In this section, our goal is to solve a more general case, where the empirical primal-dual and finite-sum optimization problem shown as follows:

$$\min_{\theta \in \Theta} \max_{\omega \in \mathcal{W}} \frac{1}{M} \sum_{i=1}^M \mathcal{L}_i(\theta, \omega) = \min_{\theta \in \Theta} \max_{\omega \in \mathcal{W}} \mathcal{L}(\theta, \omega). \quad (83)$$

Compared to the original Algorithm. 1, our new Algorithm. Algorithm: VRPD-constraint-theta performs the projection operations to cope with the domain constraint set  $\Theta$  to ensure the upper-level variables  $\theta \in \Theta$ . Specifically, the update rule of in Eqs. (8) was instead by

$$\theta^{(k+1)} = \mathcal{P}_{\Theta}(\theta^{(k)} - \beta G_{\theta}^{(k)}) = \underset{\tilde{\theta} \in \Theta}{\operatorname{argmin}} \|\tilde{\theta} - (\theta^{(k)} - \beta G_{\theta}^{(k)})\|^2.$$

---

**Algorithm 3** The Variance-Reduced Primal-Dual Stochastic Gradient Method with the proximal operator on  $\theta$  (Prox- $\theta$ -VRPD).

---

**Input:** An  $M$ -step trajectory of the state-action pairs  $\{s_1, a_1, s_2, a_2, \dots, s_M, a_M, s_{M+1}\}$  generated from a given policy; step sizes  $\alpha, \beta \geq 0$ ; initialization points  $\theta^0 \in \mathbb{R}^d, \omega^0 \in \mathcal{W}$ .

**Output:**  $(\theta^{(\tilde{K})}, \omega^{(\tilde{K})})$ , where  $\tilde{K}$  is independently and uniformly picked from  $\{1, \dots, K\}$ ;

- 1: **for**  $k = 0, 1, 2, \dots, K-1$  **do**
- 2:   If  $\text{mod}(k, q) = 0$ , compute full gradients  $G_{\theta}^{(k)}, G_{\omega}^{(k)}$  as in Eq. (6).
- 3:   Otherwise, select  $S$  samples independently and uniformly from  $[M]$ , and compute gradients as in Eq. (7).
- 4:   Perform the primal-dual updates to obtain the next iterate  $\theta^{(k+1)}, \omega^{(k+1)}$  as follows:

$$\theta^{(k+1)} = \mathcal{P}_{\Theta}(\theta^{(k)} - \beta G_{\theta}^{(k)}) = \underset{\tilde{\theta} \in \Theta}{\operatorname{argmin}} \|\tilde{\theta} - (\theta^{(k)} - \beta G_{\theta}^{(k)})\|^2; \quad (84a)$$

$$\omega^{(k+1)} = \mathcal{P}_{\mathcal{W}}(\omega^{(k)} + \alpha G_{\omega}^{(k)}) = \underset{\tilde{\omega} \in \Omega}{\operatorname{argmin}} \|\tilde{\omega} - (\omega^{(k)} + \alpha G_{\omega}^{(k)})\|^2, \quad (84b)$$

5: **end for**

---

**Theorem 5.** Under Assumptions 1–3, and the update rule of of Algorithm. 3. Letting  $0 < \beta \leq \frac{1}{2(L_f + \frac{L_f^2}{\mu})}$ , choose step-sizes:  $\alpha \leq \min\{\frac{1}{4L_f}, \frac{2\mu}{34L_f^2 + 2\mu^2}\}$  and  $\beta \leq \min\{\frac{1}{4L_f}, \frac{1}{2(L_f + L_f^2/\mu)}, \frac{\mu}{8\sqrt{17}L_f^2}, \frac{\mu^2\alpha}{8\sqrt{34}L_f^2}\}$ . Let  $q = \sqrt{M}$  and  $S = \sqrt{M}$ , it holds that:

$$\begin{aligned} & \frac{1}{K} \sum_{k=0}^{K-1} \mathbb{E}[\|\theta^{(k+1)} - \theta^{(k)}\|^2 + \|\omega^{(k)} - \omega^*(\theta^{(k)})\|^2] \\ & \leq \frac{1}{K \min\{1, L_f^2\}} \left[ \frac{16L_f^2}{\alpha\mu} C_2 + \frac{2}{\beta} C_1 \right] = \mathcal{O}\left(\frac{1}{K}\right), \end{aligned}$$

where  $C_1 \triangleq \mathbb{E}[J(\theta^{(0)})] - \mathbb{E}[J(\theta^*)]$  and  $C_2 \triangleq (\mathbb{E}\|\omega^*(\theta^{(0)}) - \omega^{(0)}\|^2)$ .

### 12.1 SUPPORTING LEMMA FOR THEOREM.5

**Lemma 9.** Under the stated Assumptions 1-2 and Algorithm. 3. Letting  $0 < \beta \leq \frac{1}{2(L_f + \frac{L_f^2}{\mu})}$ , we have:

$$\begin{aligned} & J(\theta^{(k+1)}) - J(\theta^{(k)}) \\ & \leq L_f^2 \beta \|\omega^*(\theta^{(k)}) - \omega^{(k)}\|^2 + \beta \|\nabla_{\theta} \mathcal{L}(\theta^{(k)}, \omega^{(k)}) - G_{\theta}^{(k)}\|^2 - \frac{1}{4\beta} \|\theta^{(k+1)} - \theta^{(k)}\|^2 \end{aligned} \quad (85)$$

where  $J(\theta) \triangleq \max_{\omega \in \Omega} \mathcal{L}(\theta, \omega)$  and  $\omega^*(\theta) = \operatorname{argmax}_{\omega \in \Omega} \mathcal{L}(\theta, \omega)$ .

*Proof.*  $J(\theta)$  has as Lipschitz continuous gradients, which implies

$$J(\theta^{(k+1)}) - J(\theta^{(k)}) - \langle \nabla J(\theta^{(k)}), \theta^{(k+1)} - \theta^{(k)} \rangle \leq \frac{L_J}{2} \|\theta^{(k+1)} - \theta^{(k)}\|^2. \quad (86)$$

By rearranging the terms, we have

$$\begin{aligned} & J(\theta^{(k+1)}) - J(\theta^{(k)}) \\ & \leq \langle \nabla J(\theta^{(k)}), \theta^{(k+1)} - \theta^{(k)} \rangle + \frac{L_J}{2} \|\theta^{(k+1)} - \theta^{(k)}\|^2 \\ & = \langle \nabla J(\theta^{(k)}) - \nabla_{\theta} \mathcal{L}(\theta^{(k)}, \omega^{(k)}), \theta^{(k+1)} - \theta^{(k)} \rangle + \langle \nabla_{\theta} \mathcal{L}(\theta^{(k)}, \omega^{(k)}) - G_{\theta}^{(k)}, \theta^{(k+1)} - \theta^{(k)} \rangle \\ & \quad + \langle G_{\theta}^{(k)}, \theta^{(k+1)} - \theta^{(k)} \rangle + \frac{L_J}{2} \|\theta^{(k+1)} - \theta^{(k)}\|^2. \end{aligned} \quad (87)$$

Since  $\theta^{(k+1)} = \mathcal{P}_{\Theta}(\theta^{(k)} - \beta G_{\theta}^{(k)}) = \underset{\tilde{\theta} \in \Theta}{\operatorname{argmin}} \|\tilde{\theta} - (\theta^{(k)} - \beta G_{\theta}^{(k)})\|^2$  and the optimality condition for constrained optimization Nesterov et al. (2018), we have

$$\langle \beta G_{\theta}^{(k)} + \theta^{(k+1)} - \theta^{(k)}, \theta - \theta^{(k+1)} \rangle \geq 0, \quad \forall \theta \in \Theta. \quad (88)$$

Let  $\theta = \theta^{(k)}$ , we have

$$\langle \beta G_{\theta}^{(k)} + \theta^{(k+1)} - \theta^{(k)}, \theta^{(k)} - \theta^{(k+1)} \rangle \geq 0. \quad (89)$$

Thus, for (87), we can conclude that

$$\begin{aligned} & J(\theta^{(k+1)}) - J(\theta^{(k)}) \\ & \leq \langle \nabla J(\theta^{(k)}) - \nabla_{\theta} \mathcal{L}(\theta^{(k)}, \omega^{(k)}), \theta^{(k+1)} - \theta^{(k)} \rangle + \langle \nabla_{\theta} \mathcal{L}(\theta^{(k)}, \omega^{(k)}) - G_{\theta}^{(k)}, \theta^{(k+1)} - \theta^{(k)} \rangle \\ & \quad + \langle G_{\theta}^{(k)}, \theta^{(k+1)} - \theta^{(k)} \rangle + \frac{L_J}{2} \|\theta^{(k+1)} - \theta^{(k)}\|^2 \\ & \stackrel{(a)}{\leq} \langle \nabla J(\theta^{(k)}) - \nabla_{\theta} \mathcal{L}(\theta^{(k)}, \omega^{(k)}), \theta^{(k+1)} - \theta^{(k)} \rangle + \langle \nabla_{\theta} \mathcal{L}(\theta^{(k)}, \omega^{(k)}) - G_{\theta}^{(k)}, \theta^{(k+1)} - \theta^{(k)} \rangle \\ & \quad - \frac{1}{\beta} \|\theta^{(k+1)} - \theta^{(k)}\|^2 + \frac{L_J}{2} \|\theta^{(k+1)} - \theta^{(k)}\|^2 \\ & \stackrel{(b)}{\leq} \frac{2\beta}{2} \|\nabla J(\theta^{(k)}) - \nabla_{\theta} \mathcal{L}(\theta^{(k)}, \omega^{(k)})\|^2 + \frac{1}{4\beta} \|\theta^{(k+1)} - \theta^{(k)}\|^2 \\ & \quad + \frac{2\beta}{2} \|\nabla_{\theta} \mathcal{L}(\theta^{(k)}, \omega^{(k)}) - G_{\theta}^{(k)}\|^2 + \frac{1}{4\beta} \|\theta^{(k+1)} - \theta^{(k)}\|^2 \\ & \quad - \frac{1}{\beta} \|\theta^{(k+1)} - \theta^{(k)}\|^2 + \frac{L_J}{2} \|\theta^{(k+1)} - \theta^{(k)}\|^2 \\ & = \beta \|\nabla J(\theta^{(k)}) - \nabla_{\theta} \mathcal{L}(\theta^{(k)}, \omega^{(k)})\|^2 + \beta \|\nabla_{\theta} \mathcal{L}(\theta^{(k)}, \omega^{(k)}) - G_{\theta}^{(k)}\|^2 \\ & \quad - \frac{1}{2\beta} \|\theta^{(k+1)} - \theta^{(k)}\|^2 + \frac{L_J}{2} \|\theta^{(k+1)} - \theta^{(k)}\|^2 \\ & \stackrel{(c)}{\leq} L_f^2 \beta \|\omega^*(\theta^{(k)}) - \omega^{(k)}\|^2 + \beta \|\nabla_{\theta} \mathcal{L}(\theta^{(k)}, \omega^{(k)}) - G_{\theta}^{(k)}\|^2 \\ & \quad - \left( \frac{1}{2\beta} - \frac{L_J}{2} \right) \|\theta^{(k+1)} - \theta^{(k)}\|^2, \end{aligned} \quad (90)$$

where (a) follows from (89), (b) follows from the Young's inequality, and (c) follows from the  $L_f$ -Smoothness assumption. We can simplify the coefficient as

$$- \left( \frac{1}{2\beta} - \frac{L_J}{2} \right) \leq - \frac{1}{4\beta}, \quad (91)$$



by setting  $\beta \leq \frac{1}{2L_J}$ . Since  $L_f \geq \mu > 0$  and recall that  $L_J = L_f + \frac{L_f^2}{\mu}$  from Lemma 1, we obtain

$$\begin{aligned} & J(\boldsymbol{\theta}^{(k+1)}) - J(\boldsymbol{\theta}^{(k)}) \\ & \leq L_f^2 \beta \|\boldsymbol{\omega}^*(\boldsymbol{\theta}^{(k)}) - \boldsymbol{\omega}^{(k)}\|^2 + \beta \|\nabla_{\boldsymbol{\theta}} \mathcal{L}(\boldsymbol{\theta}^{(k)}, \boldsymbol{\omega}^{(k)}) - G_{\boldsymbol{\theta}}^{(k)}\|^2 - \frac{1}{4\beta} \|\boldsymbol{\theta}^{(k+1)} - \boldsymbol{\theta}^{(k)}\|^2. \end{aligned} \quad (92)$$

This completes the proof.  $\square$

## 12.2 PROOF OF THEOREM 5

*Proof.* Taking expectation on both sides of Lemma 5 with respect to the randomness of the algorithm, we have

$$\begin{aligned} & \mathbb{E}[J(\boldsymbol{\theta}^{(k+1)}) - J(\boldsymbol{\theta}^{(k)})] \\ & \leq -\frac{1}{4\beta} \mathbb{E}\|\boldsymbol{\theta}^{(k+1)} - \boldsymbol{\theta}^{(k)}\|^2 + L_f^2 \beta \mathbb{E}\|\boldsymbol{\omega}^*(\boldsymbol{\theta}^{(k)}) - \boldsymbol{\omega}^{(k)}\|^2 + \beta \mathbb{E}\|\nabla_{\boldsymbol{\theta}} \mathcal{L}(\boldsymbol{\theta}^{(k)}, \boldsymbol{\omega}^{(k)}) - G_{\boldsymbol{\theta}}^{(k)}\|^2 \\ & \stackrel{(a)}{\leq} \beta [\mathbb{E}\|\nabla_{\boldsymbol{\theta}} \mathcal{L}(\boldsymbol{\theta}^{((n_k-1)q)}, \boldsymbol{\omega}^{((n_k-1)q)}) - G_{\boldsymbol{\theta}}^{((n_k-1)q)}\|^2 \\ & \quad + \frac{L_f^2}{|S|} \sum_{i=(n_k-1)q}^{k-1} \mathbb{E}\|\boldsymbol{\theta}^{(i+1)} - \boldsymbol{\theta}^{(i)}\|^2 + \frac{L_f^2}{|S|} \sum_{i=(n_k-1)q}^{k-1} \mathbb{E}\|\boldsymbol{\omega}^{(i+1)} - \boldsymbol{\omega}^{(i)}\|^2] \\ & \quad - \frac{\beta}{2} \mathbb{E}\|\nabla J(\boldsymbol{\theta}^{(k)})\|^2 - \frac{1}{4\beta} \mathbb{E}\|\boldsymbol{\theta}^{(k+1)} - \boldsymbol{\theta}^{(k)}\|^2 + L_f^2 \beta \mathbb{E}\|\boldsymbol{\omega}^*(\boldsymbol{\theta}^{(k)}) - \boldsymbol{\omega}^{(k)}\|^2, \end{aligned} \quad (93)$$

where (a) follows from Lemma 4. Next, telescoping over  $k$  from  $(n_k - 1)q + 1$  to  $k$ , where  $k \leq n_k q - 1$ , we obtain that

$$\begin{aligned} & \mathbb{E}[J(\boldsymbol{\theta}^{(k+1)}) - J(\boldsymbol{\theta}^{(n_k-1)q})] \\ & \leq \beta \left[ \frac{L_f^2}{|S|} \sum_{j=(n_k-1)q}^k \sum_{i=(n_k-1)q}^{j-1} \mathbb{E}\|\boldsymbol{\theta}^{(i+1)} - \boldsymbol{\theta}^{(i)}\|^2 + \frac{L_f^2}{|S|} \sum_{j=(n_k-1)q}^k \sum_{i=(n_k-1)q}^{j-1} \mathbb{E}\|\boldsymbol{\omega}^{(i+1)} - \boldsymbol{\omega}^{(i)}\|^2 \right] \\ & \quad + L_f^2 \beta \sum_{i=(n_k-1)q}^k \mathbb{E}\|\boldsymbol{\omega}^{(i)} - \boldsymbol{\omega}^*(\boldsymbol{\theta}^{(i)})\|^2 - \frac{1}{4\beta} \sum_{j=(n_k-1)q}^k \mathbb{E}\|\boldsymbol{\theta}^{(j+1)} - \boldsymbol{\theta}^{(j)}\|^2 \\ & \stackrel{(a)}{\leq} \beta \left[ \frac{L_f^2}{|S|} \sum_{j=(n_k-1)q}^k \sum_{i=(n_k-1)q}^k \mathbb{E}\|\boldsymbol{\theta}^{(i+1)} - \boldsymbol{\theta}^{(i)}\|^2 + \frac{L_f^2}{|S|} \sum_{j=(n_k-1)q}^k \sum_{i=(n_k-1)q}^k \mathbb{E}\|\boldsymbol{\omega}^{(i+1)} - \boldsymbol{\omega}^{(i)}\|^2 \right] \\ & \quad + L_f^2 \beta \sum_{i=(n_k-1)q}^k \mathbb{E}\|\boldsymbol{\omega}^{(i)} - \boldsymbol{\omega}^*(\boldsymbol{\theta}^{(i)})\|^2 - \frac{1}{4\beta} \sum_{j=(n_k-1)q}^k \mathbb{E}\|\boldsymbol{\theta}^{(j+1)} - \boldsymbol{\theta}^{(j)}\|^2 \\ & \stackrel{(b)}{\leq} \beta \left[ \frac{L_f^2}{|S|} q \sum_{i=(n_k-1)q}^k \mathbb{E}\|\boldsymbol{\theta}^{(i+1)} - \boldsymbol{\theta}^{(i)}\|^2 + \frac{L_f^2}{|S|} q \sum_{i=(n_k-1)q}^k \mathbb{E}\|\boldsymbol{\omega}^{(i+1)} - \boldsymbol{\omega}^{(i)}\|^2 \right] \\ & \quad + L_f^2 \beta \sum_{i=(n_k-1)q}^k \mathbb{E}\|\boldsymbol{\omega}^{(i)} - \boldsymbol{\omega}^*(\boldsymbol{\theta}^{(i)})\|^2 - \frac{1}{4\beta} \sum_{j=(n_k-1)q}^k \mathbb{E}\|\boldsymbol{\theta}^{(j+1)} - \boldsymbol{\theta}^{(j)}\|^2 \\ & = \left( \frac{\beta L_f^2}{|S|} q - \frac{1}{4} \beta \right) \sum_{i=(n_k-1)q}^k \mathbb{E}\|\boldsymbol{\theta}^{(i+1)} - \boldsymbol{\theta}^{(i)}\|^2 + \frac{\beta L_f^2}{|S|} q \sum_{i=(n_k-1)q}^k \mathbb{E}\|\boldsymbol{\omega}^{(i+1)} - \boldsymbol{\omega}^{(i)}\|^2 \\ & \quad + L_f^2 \beta \sum_{i=(n_k-1)q}^k \mathbb{E}\|\boldsymbol{\omega}^{(i)} - \boldsymbol{\omega}^*(\boldsymbol{\theta}^{(i)})\|^2, \end{aligned} \quad (94)$$

where (a) extends the summation of second term from  $j - 1$  to  $k$ , and (b) follows from the fact that  $k \leq n_k q - 1$ . We continue the proof by further deriving

$$\begin{aligned}
& \mathbb{E}J(\boldsymbol{\theta}^{(K)}) - \mathbb{E}J(\boldsymbol{\theta}^{(0)}) \\
&= \mathbb{E}J(\boldsymbol{\theta}^{(q)}) - \mathbb{E}J(\boldsymbol{\theta}^{(0)}) + \mathbb{E}J(\boldsymbol{\theta}^{(2q)}) - \mathbb{E}J(\boldsymbol{\theta}^{(q)}) + \mathbb{E}J(\boldsymbol{\theta}^{(K)}) - \mathbb{E}J(\boldsymbol{\theta}^{((n_K-1)q)}) \\
&\stackrel{(a)}{\leq} \left(\frac{\beta L_f^2}{|S|}q - \frac{1}{4\beta}\right) \sum_{i=0}^{K-1} \mathbb{E}\|\boldsymbol{\theta}^{(i+1)} - \boldsymbol{\theta}^{(i)}\|^2 + \frac{\beta L_f^2}{|S|}q \sum_{i=0}^{K-1} \mathbb{E}\|\boldsymbol{\omega}^{(i+1)} - \boldsymbol{\omega}^{(i)}\|^2 \\
&\quad + L_f^2 \beta \sum_{i=0}^{K-1} \mathbb{E}\|\boldsymbol{\omega}^{(i)} - \boldsymbol{\omega}^*(\boldsymbol{\theta}^{(i)})\|^2, \tag{95}
\end{aligned}$$

where (a) follows from (94).

By taking expectation on both sides of Lemma 7 with respect to the randomness of the algorithm, we have

$$\begin{aligned}
& \mathbb{E}\|\boldsymbol{\omega}^{(k+1)} - \boldsymbol{\omega}^*(\boldsymbol{\theta}^{(k+1)})\|^2 \leq -\frac{1}{4}\mathbb{E}\|\boldsymbol{\omega}^{(k+1)} - \boldsymbol{\omega}^{(k)}\|^2 + \frac{17}{4\alpha\mu}L_\omega^2\mathbb{E}\|\boldsymbol{\theta}^{k+1} - \boldsymbol{\theta}^k\|^2 \\
&\quad + \frac{17\alpha}{4\mu}\mathbb{E}\|\nabla_\omega \mathcal{L}(\boldsymbol{\theta}^{(k)}, \boldsymbol{\omega}^{(k)}) - G_\omega^{(k)}\|^2 + (1 - \frac{\alpha\mu}{4})\mathbb{E}\|\boldsymbol{\omega}^*(\boldsymbol{\theta}^{(k)}) - \boldsymbol{\omega}^{(k)}\|^2 \\
&\stackrel{(a)}{\leq} -\frac{1}{4}\mathbb{E}\|\boldsymbol{\omega}^{(k+1)} - \boldsymbol{\omega}^{(k)}\|^2 + \frac{17\beta^2}{4\alpha\mu}L_\omega^2\mathbb{E}\|G_\theta^k\|^2 + (1 - \frac{\alpha\mu}{4})\mathbb{E}\|\boldsymbol{\omega}^*(\boldsymbol{\theta}^{(k)}) - \boldsymbol{\omega}^{(k)}\|^2 \\
&\quad + \frac{17\alpha}{4\mu}[\mathbb{E}\|\nabla_\omega \mathcal{L}(\boldsymbol{\theta}^{((n_k-1)q)}, \boldsymbol{\omega}^{((n_k-1)q)}) - G_\omega^{((n_k-1)q)}\|^2 \\
&\quad + \frac{L_f^2}{|S|} \sum_{i=(n_k-1)q}^{k-1} \mathbb{E}\|\boldsymbol{\theta}^{(i+1)} - \boldsymbol{\theta}^{(i)}\|^2 + \frac{L_f^2}{|S|} \sum_{i=(n_k-1)q}^{k-1} \mathbb{E}\|\boldsymbol{\omega}^{(i+1)} - \boldsymbol{\omega}^{(i)}\|^2] \\
&\stackrel{(b)}{\leq} -\frac{1}{4}\mathbb{E}\|\boldsymbol{\omega}^{(k+1)} - \boldsymbol{\omega}^{(k)}\|^2 + \frac{17\beta^2}{4\alpha\mu}L_\omega^2\mathbb{E}\|G_\theta^k\|^2 + (1 - \frac{\alpha\mu}{4})\mathbb{E}\|\boldsymbol{\omega}^*(\boldsymbol{\theta}^{(k)}) - \boldsymbol{\omega}^{(k)}\|^2 \\
&\quad + \frac{17\alpha}{4\mu}[\frac{L_f^2}{|S|} \sum_{i=(n_k-1)q}^{k-1} \mathbb{E}\|\boldsymbol{\theta}^{(i+1)} - \boldsymbol{\theta}^{(i)}\|^2 + \frac{L_f^2}{|S|} \sum_{i=(n_k-1)q}^{k-1} \mathbb{E}\|\boldsymbol{\omega}^{(i+1)} - \boldsymbol{\omega}^{(i)}\|^2], \tag{96}
\end{aligned}$$

where (a) follows from Lemma 4, and (b) follows from  $\|\nabla_\omega \mathcal{L}(\boldsymbol{\theta}^{((n_k-1)q)}, \boldsymbol{\omega}^{((n_k-1)q)}) - G_\omega^{((n_k-1)q)}\|^2 = 0$ . Next, summing up both sides of (96) from  $i = k$  to  $i = (n_k - 1)q$  yields

$$\begin{aligned}
& \mathbb{E}\|\boldsymbol{\omega}^{(k+1)} - \boldsymbol{\omega}^*(\boldsymbol{\theta}^{(k+1)})\|^2 - \mathbb{E}\|\boldsymbol{\omega}^*(\boldsymbol{\theta}^{(n_k-1)q}) - \boldsymbol{\omega}^{(n_k-1)q}\|^2 \\
&\leq -\frac{1}{4} \sum_{i=(n_k-1)q}^k \mathbb{E}\|\boldsymbol{\omega}^{(i+1)} - \boldsymbol{\omega}^{(i)}\|^2 + \frac{17\beta^2}{4\alpha\mu}L_\omega^2 \sum_{i=(n_k-1)q}^k \mathbb{E}\|G_\theta^{(i)}\|^2 \\
&\quad - \frac{\alpha\mu}{4} \sum_{i=(n_k-1)q}^k \mathbb{E}\|\boldsymbol{\omega}^*(\boldsymbol{\theta}^{(i)}) - \boldsymbol{\omega}^{(i)}\|^2 \\
&\quad + \frac{17\alpha}{4\mu}[\frac{L_f^2}{|S|} \sum_{j=(n_k-1)q}^k \sum_{i=(n_k-1)q}^{j-1} \mathbb{E}\|\boldsymbol{\theta}^{(i+1)} - \boldsymbol{\theta}^{(i)}\|^2 + \frac{L_f^2}{|S|} \sum_{j=(n_k-1)q}^k \sum_{i=(n_k-1)q}^{j-1} \mathbb{E}\|\boldsymbol{\omega}^{(i+1)} - \boldsymbol{\omega}^{(i)}\|^2] \\
&\stackrel{(a)}{\leq} -\frac{1}{4} \sum_{i=(n_k-1)q}^k \mathbb{E}\|\boldsymbol{\omega}^{(i+1)} - \boldsymbol{\omega}^{(i)}\|^2 + \frac{17\beta^2}{4\alpha\mu}L_\omega^2 \sum_{i=(n_k-1)q}^k \mathbb{E}\|G_\theta^{(i)}\|^2 \\
&\quad - \frac{\alpha\mu}{4} \sum_{i=(n_k-1)q}^k \mathbb{E}\|\boldsymbol{\omega}^*(\boldsymbol{\theta}^{(i)}) - \boldsymbol{\omega}^{(i)}\|^2 \\
&\quad + \frac{17\alpha}{4\mu}[\frac{L_f^2}{|S|} \sum_{j=(n_k-1)q}^k \sum_{i=(n_k-1)q}^k \mathbb{E}\|\boldsymbol{\theta}^{(i+1)} - \boldsymbol{\theta}^{(i)}\|^2 + \frac{L_f^2}{|S|} \sum_{j=(n_k-1)q}^k \sum_{i=(n_k-1)q}^k \mathbb{E}\|\boldsymbol{\omega}^{(i+1)} - \boldsymbol{\omega}^{(i)}\|^2]
\end{aligned}$$

$$\begin{aligned}
&\stackrel{(b)}{\leq} -\frac{1}{4} \sum_{i=(n_k-1)q}^k \mathbb{E} \|\omega^{(i+1)} - \omega^{(i)}\|^2 + \frac{17}{4\alpha\mu} L_\omega^2 \sum_{i=(n_k-1)q}^k \|\omega^{(i+1)} - \omega^{(i)}\|^2 \\
&\quad - \frac{\alpha\mu}{4} \sum_{i=(n_k-1)q}^k \mathbb{E} \|\omega^*(\theta^{(i)}) - \omega^{(i)}\|^2 \\
&\quad + \frac{17\alpha}{4\mu} \left[ \frac{L_f^2}{|S|} q \sum_{i=(n_k-1)q}^k \mathbb{E} \|\theta^{(i+1)} - \theta^{(i)}\|^2 + \frac{L_f^2}{|S|} q \sum_{i=(n_k-1)q}^k \mathbb{E} \|\omega^{(i+1)} - \omega^{(i)}\|^2 \right], \tag{97}
\end{aligned}$$

where (a) extends the summation of second term from  $j-1$  to  $k$ , and (b) follows from the fact that  $k \leq n_k q - 1$ . We continue the proof by further driving

$$\begin{aligned}
&\mathbb{E} \|\omega^{(K)} - \omega^*(\theta^{(K)})\|^2 - \mathbb{E} \|\omega^*(\theta^{(0)}) - \omega^{(0)}\|^2 \\
&= \mathbb{E} \|\omega^{(q)} - \omega^*(\theta^{(q)})\|^2 - \mathbb{E} \|\omega^*(\theta^{(0)}) - \omega^{(0)}\|^2 + \mathbb{E} \|\omega^{(2q)} - \omega^*(\theta^{(2q)})\|^2 \\
&\quad - \mathbb{E} \|\omega^*(\theta^{(q)}) - \omega^{(q)}\|^2 + \dots + \mathbb{E} \|\omega^{(K)} - \omega^*(\theta^{(K)})\|^2 - \mathbb{E} \|\omega^*(\theta^{(n_K-1)q}) - \omega^*(\theta^{(n_K-1)q})\|^2 \\
&\leq -\frac{1}{4} \sum_{i=0}^{K-1} \mathbb{E} \|\omega^{(i+1)} - \omega^{(i)}\|^2 + \frac{17}{4\alpha\mu} L_\omega^2 \sum_{i=0}^{K-1} \mathbb{E} \|\theta^{(i+1)} - \theta^{(i)}\|^2 \\
&\quad - \frac{\alpha\mu}{4} \sum_{i=0}^{K-1} \mathbb{E} \|\omega^*(\theta^{(i)}) - \omega^{(i)}\|^2 + \frac{17\alpha}{4\mu} \left[ \frac{L_f^2}{|S|} q \sum_{i=0}^{K-1} \mathbb{E} \|\theta^{(i+1)} - \theta^{(i)}\|^2 \right. \\
&\quad \left. + \frac{L_f^2}{|S|} q \sum_{i=0}^{K-1} \mathbb{E} \|\omega^{(i+1)} - \omega^{(i)}\|^2 \right]. \tag{98}
\end{aligned}$$

Next, multiplying both sides by  $\frac{8\beta L_f^2}{\alpha\mu}$  and rearranging the above terms, we obtain

$$\begin{aligned}
&2\beta L_f^2 \sum_{i=0}^{K-1} \mathbb{E} \|\omega^*(\theta^{(i)}) - \omega^{(i)}\|^2 \\
&\leq -\frac{2\beta L_f^2}{\alpha\mu} \sum_{i=0}^{K-1} \mathbb{E} \|\omega^{(i+1)} - \omega^{(i)}\|^2 + \frac{34\beta L_f^2}{\alpha^2 \mu^2} L_\omega^2 \sum_{i=0}^{K-1} \mathbb{E} \|\theta^{(i+1)} - \theta^{(i)}\|^2 \\
&\quad - \frac{8\beta L_f^2}{\alpha\mu} (\mathbb{E} \|\omega^{(K)} - \omega^*(\theta^{(K)})\|^2 - \mathbb{E} \|\omega^*(\theta^{(0)}) - \omega^{(0)}\|^2) \\
&\quad + \frac{34\beta L_f^2}{\mu^2} \left[ \frac{L_f^2}{|S|} q \sum_{i=0}^{K-1} \mathbb{E} \|\theta^{(i+1)} - \theta^{(i)}\|^2 + \frac{L_f^2}{|S|} q \sum_{i=0}^{K-1} \mathbb{E} \|\omega^{(i+1)} - \omega^{(i)}\|^2 \right]. \tag{99}
\end{aligned}$$

Plugging (99) into (95) yields that

$$\begin{aligned}
&\mathbb{E} J(\theta^{(K)}) - \mathbb{E} J(\theta^{(0)}) + \frac{8\beta L_f^2}{\alpha\mu} \left( \mathbb{E} \|\omega^{(K)} - \omega^*(\theta^{(K)})\|^2 - \mathbb{E} \|\omega^*(\theta^{(0)}) - \omega^{(0)}\|^2 \right) \\
&\leq \left( \frac{\beta L_f^2}{|S|} q - \frac{1}{4\beta} \right) \sum_{i=0}^{K-1} \mathbb{E} \|\theta^{(i+1)} - \theta^{(i)}\|^2 + \frac{\beta L_f^2}{|S|} q \sum_{i=0}^{K-1} \mathbb{E} \|\omega^{(i+1)} - \omega^{(i)}\|^2 \\
&\quad - L_f^2 \beta \sum_{i=0}^{K-1} \mathbb{E} \|\omega^*(\theta^{(i)}) - \omega^{(i)}\|^2 \\
&\quad - \frac{2\beta L_f^2}{\alpha\mu} \sum_{i=0}^{K-1} \mathbb{E} \|\omega^{(i+1)} - \omega^{(i)}\|^2 + \frac{34\beta L_f^2}{\alpha^2 \mu^2} L_\omega^2 \sum_{i=0}^{K-1} \mathbb{E} \|\theta^{(i+1)} - \theta^{(i)}\|^2 \\
&\quad + \frac{34\beta L_f^2}{\mu^2} \left[ \frac{L_f^2}{|S|} q \sum_{i=0}^{K-1} \mathbb{E} \|\theta^{(i+1)} - \theta^{(i)}\|^2 + \frac{L_f^2}{|S|} q \sum_{i=0}^{K-1} \mathbb{E} \|\omega^{(i+1)} - \omega^{(i)}\|^2 \right].
\end{aligned}$$

(100)

Choose the following parameters:

$$\begin{aligned}\bar{C}_1 &\triangleq \mathbb{E}J(\boldsymbol{\theta}^{(0)}) - \mathbb{E}J(\boldsymbol{\theta}^{(K)}), \\ \bar{C}_2 &\triangleq (\mathbb{E}\|\boldsymbol{\omega}^*(\boldsymbol{\theta}^{(0)}) - \boldsymbol{\omega}^{(0)}\|^2 - \mathbb{E}\|\boldsymbol{\omega}^{(K)} - \boldsymbol{\omega}^*(\boldsymbol{\theta}^{(K)})\|^2).\end{aligned}\quad (101)$$

Next, multiplying both sides of (100) by  $\frac{2}{\beta}$ , and rearranging the terms, we obtain

$$\begin{aligned}& 2L_f^2 \sum_{i=0}^{K-1} \mathbb{E}\|\boldsymbol{\omega}^*(\boldsymbol{\theta}^{(i)}) - \boldsymbol{\omega}^{(i)}\|^2 \\ & - \frac{2}{\beta} \left( \frac{34L_f^4\beta}{\mu^2} \frac{1}{|S|} q + \frac{34L_f^2\beta}{\alpha^2\mu^2} L_\omega^2 + \frac{\beta L_f^2}{|S|} q - \frac{1}{4\beta} \right) \sum_{i=0}^{K-1} \mathbb{E}\|\boldsymbol{\theta}^{(i+1)} - \boldsymbol{\theta}^{(i)}\|^2 \\ & - \frac{2}{\beta} \left( -\frac{2L_f^2\beta}{\mu\alpha} + \frac{34\beta}{\mu^2} \frac{L_f^4}{|S|} q + \frac{\beta L_f^2}{|S|} q \right) \sum_{i=0}^{K-1} \mathbb{E}\|\boldsymbol{\omega}^{(i+1)} - \boldsymbol{\omega}^{(i)}\|^2 \\ & \leq \frac{16L_f^2}{\alpha\mu} \bar{C}_2 + \frac{2}{\beta} \bar{C}_1.\end{aligned}\quad (102)$$

We note that  $L_\omega = \frac{L_f}{\mu}$  from Lemma 2 . Based on the parameter settings, we have

$$\begin{aligned}q &= \sqrt{m}, S = \sqrt{m}, \alpha \leq \min\left\{\frac{1}{4L_f}, \frac{2\mu}{34L_f^2 + \mu^2}\right\}, \\ \beta &\leq \min\left\{\frac{1}{4L_f}, \frac{1}{2(L_f + \frac{L_f}{\mu})}, \frac{\mu}{8\sqrt{17}L_f^2}, \frac{\mu^2\alpha}{8\sqrt{34}L_f^2}\right\}.\end{aligned}\quad (103)$$

It follows that

$$\begin{aligned}& -\frac{2}{\beta} \left( \frac{34L_f^4\beta}{\mu^2} \frac{1}{|S|} q + \frac{34L_f^2\beta}{\alpha^2\mu^2} L_\omega^2 + \frac{\beta L_f^2}{|S|} q - \frac{1}{4\beta} \right) \\ & = \frac{1}{\beta^2} \left[ \frac{1}{2} - \left( \frac{68L_f^4\beta^2}{\mu^2} + \frac{68L_f^2\beta^2}{\alpha^2\mu^2} L_\omega^2 + 2\beta^2 L_f^2 \right) \right] \\ & = \frac{1}{\beta^2} \left[ \frac{1}{2} - \beta^2 \frac{68L_f^4}{\mu^2} - \frac{\beta^2 L_\omega^2}{\alpha^2\mu^2} (68L_f^2) - 2\beta^2 L_f^2 \right] \\ & \geq \frac{1}{\beta^2} \left[ \frac{1}{2} - \frac{1}{16} - \frac{1}{32} - \frac{1}{8} \right] > \frac{9}{32\beta^2}; \\ & -\frac{2}{\beta} \left( -\frac{2L_f^2\beta}{\mu\alpha} + \frac{34\beta}{\mu^2} \frac{L_f^4}{|S|} q + \frac{\beta L_f^2}{|S|} q \right) = \frac{4L_f^2}{\mu\alpha} - \frac{68L_f^4}{\mu^2} - 2L_f^2 \\ & = L_f^2 \left( \frac{4}{\mu\alpha} - 2 - \frac{68L_f^2}{\mu^2} \right) \geq 0.\end{aligned}\quad (104)$$

In addition, we have

$$\begin{aligned}\mathbb{E}\|\boldsymbol{\theta}^{(\xi+1)} - \boldsymbol{\theta}^{(\xi)}\|^2 &= \frac{1}{K} \sum_{i=0}^{K-1} \mathbb{E}\|\boldsymbol{\theta}^{(i+1)} - \boldsymbol{\theta}^{(i)}\|^2, \\ \mathbb{E}\|\boldsymbol{\omega}^{(\xi+1)} - \boldsymbol{\omega}^{(\xi)}\|^2 &= \frac{1}{K} \sum_{i=0}^{K-1} \mathbb{E}\|\boldsymbol{\omega}^{(i+1)} - \boldsymbol{\omega}^{(i)}\|^2, \\ \mathbb{E}\|\nabla J(\boldsymbol{\theta}^{(\xi)})\|^2 &= \frac{1}{K} \sum_{i=0}^{K-1} \|\nabla J(\boldsymbol{\theta}^{(i)})\|^2,\end{aligned}\quad (105)$$

where  $\xi$  is selected uniformly at random from  $\{0, 1, \dots, K-1\}$ . By choosing  $q = \sqrt{m}, S = \sqrt{m}$ , we have

$$\begin{aligned} & \sum_{i=0}^{K-1} \left[ \frac{9}{32\beta^2} \mathbb{E} \|\boldsymbol{\theta}^{(\xi+1)} - \boldsymbol{\theta}^{(\xi)}\|^2 + 2L_f^2 \mathbb{E} \|\boldsymbol{\omega}^*(\boldsymbol{\theta}^{(i)}) - \boldsymbol{\omega}^{(i)}\|^2 \right] \\ & \leq \frac{16L_f^2}{\alpha\mu} \bar{C}_2 + \frac{2}{\beta} \bar{C}_1, \end{aligned} \quad (106)$$

where (a) follows from (104). Since  $r_1 \geq 0, r_2 \geq 0$ , we have

$$\mathbb{E} \left[ \frac{9}{32\beta^2} \|\boldsymbol{\theta}^{(\xi+1)} - \boldsymbol{\theta}^{(\xi)}\|^2 + 2L_f^2 \|\boldsymbol{\omega}^{(\xi)} - \boldsymbol{\omega}^*(\boldsymbol{\theta}^{(\xi)})\|^2 \right] \leq \frac{1}{K} \left[ \frac{16L_f^2}{\alpha\mu} \bar{C}_2 + \frac{2}{\beta} \bar{C}_1 \right]. \quad (107)$$

Let's choose  $C_1 \triangleq \mathbb{E}[J(\boldsymbol{\theta}^{(0)})] - \mathbb{E}[J(\boldsymbol{\theta}^{(*)})]$  and  $C_2 \triangleq (\mathbb{E} \|\boldsymbol{\omega}^*(\boldsymbol{\theta}^{(0)}) - \boldsymbol{\omega}^{(0)}\|^2)$ , we have

$$\begin{aligned} & \frac{1}{K} \sum_{k=0}^{K-1} \mathbb{E} [\|\boldsymbol{\theta}^{(k+1)} - \boldsymbol{\theta}^{(k)}\|^2 + \|\boldsymbol{\omega}^{(k)} - \boldsymbol{\omega}^*(\boldsymbol{\theta}^{(k)})\|^2] \\ & \leq \frac{1}{K \min\{\frac{9}{32\beta^2}, 2L_f^2\}} \left[ \frac{16L_f^2}{\alpha\mu} C_2 + \frac{2}{\beta} C_1 \right] = \mathcal{O}\left(\frac{1}{K}\right). \end{aligned}$$

We would like to note that instead of  $\|J(\boldsymbol{\theta})\|^2$  in our proposed convergence metric, the term  $\|\boldsymbol{\theta}^{(k+1)} - \boldsymbol{\theta}^{(k)}\|^2$  measures the convergence of the primal side  $\{\boldsymbol{\theta}^{(k)}\}_{k \geq 0}$ . Since there is a condition that  $\boldsymbol{\theta} \in \Theta$ , the update rule of  $\boldsymbol{\theta}$  is that  $\boldsymbol{\theta}^{(k+1)} = \mathcal{P}_\Theta \left( \boldsymbol{\theta}^{(k)} - \beta G_{\boldsymbol{\theta}}^{(k)} \right)$ . Once we have  $\|\boldsymbol{\theta}^{(k+1)} - \boldsymbol{\theta}^{(k)}\|^2 \rightarrow 0$ , we can state that there exists a stationary point  $\boldsymbol{\theta} \in \Theta$ .

□
